# Supplementary material for: Chidamide enhances cytotoxicity of doxorubicin by promoting autophagy and apoptosis in breast cancer
Source: BMC Cancer. 2023 Apr 17;23:353. doi: 10.1186/s12885-023-10774-w (PMC10111806; doi:10.1186/s12885-023-10774-w)
Supplement: Supplementary file 1 — Additional file 1. [file 12885_2023_10774_MOESM1_ESM.xlsx]

## Sheet: up.H-1_vs_NC-1
up H-1 vs NC-1 Fold change cutoff: 2.0 Pvalue cutoff: 0.05 Column A: gene_id, the Ensembl gene identifier. Column B-F: Statistics results by edgeR between two samples, including Fold change, log2(Fold change), pvalue, padj and regulation. Column G-H: raw count of each sample. Column I-J: logCPM of each sample. Column K-Z: annotation informations, including gene name, chromosome location, EntrezID…
	statistics					raw counts		logCPM		gene annotations
gene_id	Fold change	log2FoldChange	pvalue	padj	Regulation	H-1	NC-1	H-1	NC-1	chromosome	start	end	strand	genomic_position	gene_name	gene_biotype	GeneID	Synonyms	dbXrefs	map_location	description	Pathway	GO-BP	GO-CC	GO-MF
ENSG00000000003	9.03101	3.17489	3.64988e-08	8.99477e-07	up	38	6	1.88768	-0.911577	chrX	100627108	100639991	-	chrX:100627108-100639991	TSPAN6	protein_coding	7105	T245|TM4SF6|TSPAN-6	MIM:300191|HGNC:HGNC:11858|Ensembl:ENSG00000000003	Xq22.1	tetraspanin 6		GO:0043123(positive regulation of I-kappaB kinase/NF-kappaB signaling)//GO:1901223(negative regulation of NIK/NF-kappaB signaling)//GO:0039532(negative regulation of viral-induced cytoplasmic pattern recognition receptor signaling pathway)	GO:0016021(integral component of membrane)//GO:0016020(membrane)//GO:0005887(integral component of plasma membrane)//GO:0070062(extracellular exosome)	GO:0005515(protein binding)
ENSG00000000938	2.25489	1.17306	6.2607e-07	1.0632e-05	up	421	272	5.3045	4.1377	chr1	27612064	27635185	-	chr1:27612064-27635185	FGR	protein_coding	2268	SRC2|c-fgr|c-src2|p55-Fgr|p55c-fgr|p58-Fgr|p58c-fgr	MIM:164940|HGNC:HGNC:3697|Ensembl:ENSG00000000938	1p35.3	FGR proto-oncogene, Src family tyrosine kinase	hsa04062(Chemokine signaling pathway)	GO:0006468(protein phosphorylation)//GO:0016310(phosphorylation)//GO:0002376(immune system process)//GO:0045087(innate immune response)//GO:0045088(regulation of innate immune response)//GO:0007229(integrin-mediated signaling pathway)//GO:0038096(Fc-gamma receptor signaling pathway involved in phagocytosis)//GO:0050830(defense response to Gram-positive bacterium)//GO:0030154(cell differentiation)…	GO:0005737(cytoplasm)//GO:0016020(membrane)//GO:0005886(plasma membrane)//GO:0005856(cytoskeleton)//GO:0005743(mitochondrial inner membrane)//GO:0005739(mitochondrion)//GO:0005829(cytosol)//GO:0042995(cell projection)//GO:0016235(aggresome)//GO:0005758(mitochondrial intermembrane space)//GO:0005576(extracellular region)//GO:0032587(ruffle membrane)//GO:0031234(extrinsic component of cytoplasmic s…	GO:0005524(ATP binding)//GO:0005515(protein binding)//GO:0004672(protein kinase activity)//GO:0004713(protein tyrosine kinase activity)//GO:0000166(nucleotide binding)//GO:0016301(kinase activity)//GO:0016740(transferase activity)//GO:0004715(non-membrane spanning protein tyrosine kinase activity)//GO:0005102(signaling receptor binding)//GO:0001784(phosphotyrosine residue binding)//GO:0019901(pro…
ENSG00000001460	2.02984	1.02136	0.000994692	0.00601492	up	99	71	3.23347	2.2336	chr1	24356999	24416934	-	chr1:24356999-24416934	STPG1	protein_coding	90529	C1orf201|MAPO2	MIM:615826|HGNC:HGNC:28070|Ensembl:ENSG00000001460	1p36.11	sperm tail PG-rich repeat containing 1		GO:0006915(apoptotic process)//GO:0043065(positive regulation of apoptotic process)//GO:1902110(positive regulation of mitochondrial membrane permeability involved in apoptotic process)	GO:0005739(mitochondrion)//GO:0005634(nucleus)//GO:0005737(cytoplasm)	GO:0003674(molecular_function)
ENSG00000001626	14.0894	3.81654	0.000352487	0.00248323	up	11	1	0.233025	-2.24658	chr7	117287120	117715971	+	chr7:117287120-117715971	CFTR	protein_coding	1080	ABC35|ABCC7|CF|CFTR/MRP|MRP7|TNR-CFTR|dJ760C5.1	MIM:602421|HGNC:HGNC:1884|Ensembl:ENSG00000001626	7q31.2	CF transmembrane conductance regulator	hsa02010(ABC transporters)//hsa04024(cAMP signaling pathway)//hsa04152(AMPK signaling pathway)//hsa04530(Tight junction)//hsa04971(Gastric acid secretion)//hsa04972(Pancreatic secretion)//hsa04976(Bile secretion)//hsa05110(Vibrio cholerae infection)	GO:0006811(ion transport)//GO:0055085(transmembrane transport)//GO:1902476(chloride transmembrane transport)//GO:0006695(cholesterol biosynthetic process)//GO:0006821(chloride transport)//GO:0006904(vesicle docking involved in exocytosis)//GO:0015701(bicarbonate transport)//GO:0030301(cholesterol transport)//GO:0035774(positive regulation of insulin secretion involved in cellular response to gluc…	GO:0016021(integral component of membrane)//GO:0016020(membrane)//GO:0005634(nucleus)//GO:0005737(cytoplasm)//GO:0005783(endoplasmic reticulum)//GO:0005789(endoplasmic reticulum membrane)//GO:0005886(plasma membrane)//GO:0005768(endosome)//GO:0005829(cytosol)//GO:0016324(apical plasma membrane)//GO:0010008(endosome membrane)//GO:0005769(early endosome)//GO:0009986(cell surface)//GO:0055037(recycl…	GO:0005524(ATP binding)//GO:0042626(ATPase-coupled transmembrane transporter activity)//GO:0005254(chloride channel activity)//GO:0016887(ATPase activity)//GO:0000166(nucleotide binding)//GO:0016853(isomerase activity)//GO:0005515(protein binding)//GO:0005260(intracellularly ATP-gated chloride channel activity)//GO:0015106(bicarbonate transmembrane transporter activity)//GO:0015108(chloride trans…
ENSG00000003147	2.77224	1.47105	1.09652e-07	2.26776e-06	up	179	94	4.07785	2.6274	chr7	8113184	8262687	-	chr7:8113184-8262687	ICA1	protein_coding	3382	ICA69|ICAp69	MIM:147625|HGNC:HGNC:5343|Ensembl:ENSG00000003147	7p21.3	islet cell autoantigen 1	hsa04940(Type I diabetes mellitus)	GO:0050796(regulation of insulin secretion)//GO:0006836(neurotransmitter transport)//GO:0051049(regulation of transport)	GO:0000139(Golgi membrane)//GO:0030667(secretory granule membrane)//GO:0005737(cytoplasm)//GO:0016020(membrane)//GO:0043231(intracellular membrane-bounded organelle)//GO:0005829(cytosol)//GO:0005794(Golgi apparatus)//GO:0031410(cytoplasmic vesicle)//GO:0030054(cell junction)//GO:0045202(synapse)//GO:0030672(synaptic vesicle membrane)//GO:0030658(transport vesicle membrane)//GO:0016021(integral co…	GO:0019904(protein domain specific binding)//GO:0005515(protein binding)//GO:0140090(membrane curvature sensor activity)
ENSG00000003249	3.48645	1.80176	0.00662995	0.0286726	up	17	7	0.796127	-0.747149	chr16	90004871	90019890	-	chr16:90004871-90019890	DBNDD1	protein_coding	79007	-	HGNC:HGNC:28455|Ensembl:ENSG00000003249	16q24.3	dysbindin domain containing 1		GO:0006469(negative regulation of protein kinase activity)	GO:0005737(cytoplasm)
ENSG00000003400	2.11836	1.08295	2.93384e-06	4.12497e-05	up	474	326	5.47496	4.39698	chr2	201182898	201229406	+	chr2:201182898-201229406	CASP10	protein_coding	843	ALPS2|FLICE-2|FLICE2|MCH4	MIM:601762|HGNC:HGNC:1500|Ensembl:ENSG00000003400	2q33.1	caspase 10	hsa04210(Apoptosis)//hsa04622(RIG-I-like receptor signaling pathway)//hsa04668(TNF signaling pathway)//hsa05152(Tuberculosis)//hsa05161(Hepatitis B)	GO:0042981(regulation of apoptotic process)//GO:0006508(proteolysis)//GO:0006915(apoptotic process)//GO:0097194(execution phase of apoptosis)//GO:0097190(apoptotic signaling pathway)//GO:0043123(positive regulation of I-kappaB kinase/NF-kappaB signaling)//GO:0007166(cell surface receptor signaling pathway)//GO:0006919(activation of cysteine-type endopeptidase activity involved in apoptotic proces…	GO:0005737(cytoplasm)//GO:0005829(cytosol)//GO:0097342(ripoptosome)//GO:0031265(CD95 death-inducing signaling complex)	GO:0005515(protein binding)//GO:0008234(cysteine-type peptidase activity)//GO:0004197(cysteine-type endopeptidase activity)//GO:0097199(cysteine-type endopeptidase activity involved in apoptotic signaling pathway)//GO:0008233(peptidase activity)//GO:0016787(hydrolase activity)//GO:0031625(ubiquitin protein ligase binding)//GO:0097153(cysteine-type endopeptidase activity involved in apoptotic proc…
ENSG00000003436	5.79174	2.534	1.80632e-10	8.29783e-09	up	76	19	2.85883	0.449844	chr2	187464230	187565760	-	chr2:187464230-187565760	TFPI	protein_coding	7035	EPI|LACI|TFI|TFPI1	MIM:152310|HGNC:HGNC:11760|Ensembl:ENSG00000003436	2q32.1	tissue factor pathway inhibitor	hsa04610(Complement and coagulation cascades)	GO:0010466(negative regulation of peptidase activity)//GO:0010951(negative regulation of endopeptidase activity)//GO:0007596(blood coagulation)//GO:0007599(hemostasis)//GO:0071383(cellular response to steroid hormone stimulus)//GO:0007598(blood coagulation, extrinsic pathway)//GO:0030195(negative regulation of blood coagulation)//GO:0032355(response to estradiol)//GO:0032496(response to lipopolys…	GO:0005576(extracellular region)//GO:0005615(extracellular space)//GO:0016020(membrane)//GO:0005783(endoplasmic reticulum)//GO:0031090(organelle membrane)//GO:0043231(intracellular membrane-bounded organelle)//GO:0005901(caveola)//GO:0009986(cell surface)//GO:0031225(anchored component of membrane)//GO:0005886(plasma membrane)	GO:0004867(serine-type endopeptidase inhibitor activity)//GO:0030414(peptidase inhibitor activity)//GO:0004866(endopeptidase inhibitor activity)
ENSG00000005001	217.241	7.76315	2.27396e-07	4.3136e-06	up	22	0	1.14015	-2.77056	chr16	2852730	2858170	-	chr16:2852730-2858170	PRSS22	protein_coding	64063	BSSP-4|SP001LA|hBSSP-4	MIM:609343|HGNC:HGNC:14368|Ensembl:ENSG00000005001	16p13.3	serine protease 22		GO:0006508(proteolysis)//GO:0010952(positive regulation of peptidase activity)	GO:0005576(extracellular region)//GO:0005615(extracellular space)	GO:0004252(serine-type endopeptidase activity)//GO:0008233(peptidase activity)//GO:0016787(hydrolase activity)//GO:0008236(serine-type peptidase activity)//GO:0016504(peptidase activator activity)
ENSG00000005102	12.8203	3.68036	0.00788025	0.0331803	up	10	1	0.1134	-2.24658	chr17	43640389	43661922	-	chr17:43640389-43661922	MEOX1	protein_coding	4222	KFS2|MOX1	MIM:600147|HGNC:HGNC:7013|Ensembl:ENSG00000005102	17q21.31	mesenchyme homeobox 1		GO:0006355(regulation of transcription, DNA-templated)//GO:0045944(positive regulation of transcription by RNA polymerase II)//GO:0007275(multicellular organism development)//GO:0006357(regulation of transcription by RNA polymerase II)//GO:0008150(biological_process)//GO:0060218(hematopoietic stem cell differentiation)//GO:0061053(somite development)//GO:0001757(somite specification)//GO:0061056(…	GO:0005634(nucleus)//GO:0005737(cytoplasm)//GO:0000785(chromatin)	GO:0003677(DNA binding)//GO:0003700(DNA-binding transcription factor activity)//GO:0000981(DNA-binding transcription factor activity, RNA polymerase II-specific)//GO:0005515(protein binding)//GO:0000978(RNA polymerase II cis-regulatory region sequence-specific DNA binding)//GO:0043565(sequence-specific DNA binding)//GO:1990837(sequence-specific double-stranded DNA binding)//GO:0001228(DNA-binding…
ENSG00000005187	4.43113	2.14768	1.59907e-06	2.40609e-05	up	49	16	2.24158	0.230651	chr16	20610243	20797581	+	chr16:20610243-20797581	ACSM3	protein_coding	6296	SA|SAH	MIM:145505|HGNC:HGNC:10522|Ensembl:ENSG00000005187	16p12.3	acyl-CoA synthetase medium chain family member 3	hsa00650(Butanoate metabolism)//hsa01100(Metabolic pathways)	GO:0042632(cholesterol homeostasis)//GO:0006629(lipid metabolic process)//GO:0006631(fatty acid metabolic process)//GO:0008217(regulation of blood pressure)//GO:0006637(acyl-CoA metabolic process)//GO:0006633(fatty acid biosynthetic process)	GO:0005739(mitochondrion)//GO:0005759(mitochondrial matrix)	GO:0003824(catalytic activity)//GO:0046872(metal ion binding)//GO:0000166(nucleotide binding)//GO:0005524(ATP binding)//GO:0016874(ligase activity)//GO:0050218(propionate-CoA ligase activity)//GO:0004467(long-chain fatty acid-CoA ligase activity)//GO:0004321(fatty-acyl-CoA synthase activity)//GO:0015645(fatty acid ligase activity)//GO:0047760(butyrate-CoA ligase activity)//GO:0005515(protein bind…
ENSG00000005238	2.08554	1.06042	7.31866e-05	0.000658151	up	179	125	4.07785	3.03008	chr9	35104112	35116341	-	chr9:35104112-35116341	FAM214B	protein_coding	80256	KIAA1539	HGNC:HGNC:25666|Ensembl:ENSG00000005238	9p13.3	family with sequence similarity 214 member B			GO:0005634(nucleus)	GO:0005515(protein binding)
ENSG00000005471	2.21696	1.14858	4.24516e-06	5.68025e-05	up	277	182	4.70334	3.56396	chr7	87401696	87480435	-	chr7:87401696-87480435	ABCB4	protein_coding	5244	ABC21|GBD1|ICP3|MDR2|MDR2/3|MDR3|PFIC-3|PGY3	MIM:171060|HGNC:HGNC:45|Ensembl:ENSG00000005471	7q21.12	ATP binding cassette subfamily B member 4	hsa02010(ABC transporters)//hsa04976(Bile secretion)	GO:0055085(transmembrane transport)//GO:0006869(lipid transport)//GO:0006629(lipid metabolic process)//GO:0055088(lipid homeostasis)//GO:0032782(bile acid secretion)//GO:0019216(regulation of lipid metabolic process)//GO:0045332(phospholipid translocation)//GO:2001140(positive regulation of phospholipid transport)//GO:0032376(positive regulation of cholesterol transport)//GO:0061092(positive regu…	GO:0016021(integral component of membrane)//GO:0005737(cytoplasm)//GO:0016020(membrane)//GO:0005654(nucleoplasm)//GO:0005829(cytosol)//GO:0005886(plasma membrane)//GO:0031410(cytoplasmic vesicle)//GO:0005925(focal adhesion)//GO:0016324(apical plasma membrane)//GO:0045121(membrane raft)//GO:0015629(actin cytoskeleton)//GO:0030136(clathrin-coated vesicle)//GO:0070062(extracellular exosome)//GO:0005…	GO:0005524(ATP binding)//GO:0042626(ATPase-coupled transmembrane transporter activity)//GO:0016887(ATPase activity)//GO:0000166(nucleotide binding)//GO:0140326(ATPase-coupled intramembrane lipid transporter activity)//GO:0005515(protein binding)//GO:0090554(phosphatidylcholine floppase activity)//GO:0005548(phospholipid transporter activity)
ENSG00000005961	2.98723	1.57881	0.000844689	0.0052262	up	33	16	1.69278	0.230651	chr17	44372180	44389649	-	chr17:44372180-44389649	ITGA2B	protein_coding	3674	BDPLT16|BDPLT2|CD41|CD41B|GP2B|GPIIb|GT|GTA|HPA3|PPP1R93	MIM:607759|HGNC:HGNC:6138|Ensembl:ENSG00000005961	17q21.31	integrin subunit alpha 2b	hsa04015(Rap1 signaling pathway)//hsa04151(PI3K-Akt signaling pathway)//hsa04510(Focal adhesion)//hsa04512(ECM-receptor interaction)//hsa04611(Platelet activation)//hsa04613(Neutrophil extracellular trap formation)//hsa04640(Hematopoietic cell lineage)//hsa04810(Regulation of actin cytoskeleton)//hsa05165(Human papillomavirus infection)//hsa05200(Pathways in cancer)//hsa05222(Small cell lung canc…	GO:0007155(cell adhesion)//GO:0007229(integrin-mediated signaling pathway)//GO:0002576(platelet degranulation)//GO:0030198(extracellular matrix organization)//GO:0045652(regulation of megakaryocyte differentiation)//GO:0002687(positive regulation of leukocyte migration)//GO:0007160(cell-matrix adhesion)//GO:0070527(platelet aggregation)	GO:0008305(integrin complex)//GO:0016020(membrane)//GO:0016021(integral component of membrane)//GO:0005886(plasma membrane)//GO:0009986(cell surface)//GO:0070062(extracellular exosome)//GO:0072562(blood microparticle)//GO:0031092(platelet alpha granule membrane)//GO:0005925(focal adhesion)//GO:0009897(external side of plasma membrane)	GO:0046872(metal ion binding)//GO:0005515(protein binding)//GO:0042802(identical protein binding)//GO:0050840(extracellular matrix binding)//GO:0070051(fibrinogen binding)
ENSG00000006071	10.2821	3.36206	0.0246349	0.0836675	up	8	1	-0.160477	-2.24658	chr11	17392498	17476894	-	chr11:17392498-17476894	ABCC8	protein_coding	6833	ABC36|HHF1|HI|HRINS|MRP8|PHHI|PNDM3|SUR|SUR1|SUR1delta2|TNDM2	MIM:600509|HGNC:HGNC:59|Ensembl:ENSG00000006071	11p15.1	ATP binding cassette subfamily C member 8	hsa02010(ABC transporters)//hsa04911(Insulin secretion)//hsa04930(Type II diabetes mellitus)	GO:0055085(transmembrane transport)//GO:0006813(potassium ion transport)//GO:0001678(cellular glucose homeostasis)//GO:0007565(female pregnancy)//GO:0007613(memory)//GO:0008542(visual learning)//GO:0009268(response to pH)//GO:0010043(response to zinc ion)//GO:0010989(negative regulation of low-density lipoprotein particle clearance)//GO:0016525(negative regulation of angiogenesis)//GO:0032496(res…	GO:0016021(integral component of membrane)//GO:0016020(membrane)//GO:0005739(mitochondrion)//GO:0008282(inward rectifying potassium channel)//GO:0030672(synaptic vesicle membrane)//GO:0042383(sarcolemma)//GO:0005886(plasma membrane)//GO:0031004(potassium ion-transporting ATPase complex)	GO:0005524(ATP binding)//GO:0008281(sulfonylurea receptor activity)//GO:0042626(ATPase-coupled transmembrane transporter activity)//GO:0016887(ATPase activity)//GO:0000166(nucleotide binding)//GO:0005267(potassium channel activity)//GO:0005515(protein binding)//GO:0044325(ion channel binding)//GO:0015272(ATP-activated inward rectifier potassium channel activity)//GO:0019829(ATPase-coupled cation …
ENSG00000006327	6.47658	2.69523	6.57743e-08	1.4851e-06	up	45	10	2.1227	-0.343168	chr16	3018445	3022383	+	chr16:3018445-3022383	TNFRSF12A	protein_coding	51330	CD266|FN14|TWEAKR	MIM:605914|HGNC:HGNC:18152|Ensembl:ENSG00000006327	16p13.3	TNF receptor superfamily member 12A	hsa04060(Cytokine-cytokine receptor interaction)	GO:0043065(positive regulation of apoptotic process)//GO:0006915(apoptotic process)//GO:0007155(cell adhesion)//GO:0007275(multicellular organism development)//GO:0030154(cell differentiation)//GO:0001525(angiogenesis)//GO:0033209(tumor necrosis factor-mediated signaling pathway)//GO:2001238(positive regulation of extrinsic apoptotic signaling pathway)//GO:0061041(regulation of wound healing)	GO:0005886(plasma membrane)//GO:0016020(membrane)//GO:0016021(integral component of membrane)	GO:0005515(protein binding)
ENSG00000006432	3.20213	1.67903	0.00903825	0.0371537	up	20	9	1.01221	-0.465675	chr14	70722526	70809534	-	chr14:70722526-70809534	MAP3K9	protein_coding	4293	MEKK9|MLK1|PRKE1	MIM:600136|HGNC:HGNC:6861|Ensembl:ENSG00000006432	14q24.2	mitogen-activated protein kinase kinase kinase 9		GO:0006468(protein phosphorylation)//GO:0016310(phosphorylation)//GO:0006915(apoptotic process)//GO:0000186(activation of MAPKK activity)//GO:0046777(protein autophosphorylation)//GO:0007257(activation of JUN kinase activity)//GO:0007256(activation of JNKK activity)//GO:0008219(cell death)//GO:0043065(positive regulation of apoptotic process)//GO:0018108(peptidyl-tyrosine phosphorylation)//GO:000…	GO:0005575(cellular_component)	GO:0005524(ATP binding)//GO:0005515(protein binding)//GO:0004672(protein kinase activity)//GO:0004709(MAP kinase kinase kinase activity)//GO:0000166(nucleotide binding)//GO:0004674(protein serine/threonine kinase activity)//GO:0016301(kinase activity)//GO:0016740(transferase activity)//GO:0042803(protein homodimerization activity)//GO:0004708(MAP kinase kinase activity)//GO:0004706(JUN kinase kin…
ENSG00000006459	7.85657	2.9739	1.11786e-20	3.3768e-18	up	184	34	4.11726	1.21942	chr7	140084746	140176983	-	chr7:140084746-140176983	KDM7A	protein_coding	80853	JHDM1D	HGNC:HGNC:22224|Ensembl:ENSG00000006459	7q34	lysine demethylase 7A		GO:0055114(oxidation-reduction process)//GO:0006325(chromatin organization)//GO:0007399(nervous system development)//GO:0006357(regulation of transcription by RNA polymerase II)//GO:0033169(histone H3-K9 demethylation)//GO:0071557(histone H3-K27 demethylation)//GO:0006482(protein demethylation)//GO:0070544(histone H3-K36 demethylation)//GO:0030901(midbrain development)//GO:0035574(histone H4-K20 …	GO:0005634(nucleus)//GO:0005654(nucleoplasm)//GO:0005730(nucleolus)//GO:0000785(chromatin)	GO:0046872(metal ion binding)//GO:0016491(oxidoreductase activity)//GO:0008270(zinc ion binding)//GO:0051213(dioxygenase activity)//GO:0005506(iron ion binding)//GO:0032454(histone demethylase activity (H3-K9 specific))//GO:0032452(histone demethylase activity)//GO:0003712(transcription coregulator activity)//GO:0016706(2-oxoglutarate-dependent dioxygenase activity)//GO:0051864(histone demethylas…
ENSG00000006747	2.95251	1.56194	6.5809e-10	2.55757e-08	up	296	146	4.79853	3.25039	chr7	12570577	12660182	+	chr7:12570577-12660182	SCIN	protein_coding	85477	-	MIM:613416|HGNC:HGNC:21695|Ensembl:ENSG00000006747	7p21.3	scinderin	hsa04666(Fc gamma R-mediated phagocytosis)//hsa04810(Regulation of actin cytoskeleton)//hsa05203(Viral carcinogenesis)	GO:0051693(actin filament capping)//GO:0051014(actin filament severing)//GO:0008285(negative regulation of cell population proliferation)//GO:0043065(positive regulation of apoptotic process)//GO:0007417(central nervous system development)//GO:0051016(barbed-end actin filament capping)//GO:0008154(actin polymerization or depolymerization)//GO:0051047(positive regulation of secretion)//GO:0030031(…	GO:0005737(cytoplasm)//GO:0005856(cytoskeleton)//GO:0005886(plasma membrane)//GO:0030054(cell junction)//GO:0042995(cell projection)//GO:0005938(cell cortex)//GO:0002102(podosome)//GO:0070062(extracellular exosome)//GO:0015629(actin cytoskeleton)//GO:0032991(protein-containing complex)	GO:0046872(metal ion binding)//GO:0005509(calcium ion binding)//GO:0003779(actin binding)//GO:0051015(actin filament binding)//GO:0005546(phosphatidylinositol-4,5-bisphosphate binding)//GO:0001786(phosphatidylserine binding)//GO:0005545(1-phosphatidylinositol binding)
ENSG00000006788	10.2443	3.35675	0.000252789	0.00188759	up	15	2	0.631698	-1.86302	chr17	10300865	10373130	-	chr17:10300865-10373130	MYH13	protein_coding	8735	MyHC-IIL|MyHC-eo	MIM:603487|HGNC:HGNC:7571|Ensembl:ENSG00000006788	17p13.1	myosin heavy chain 13		GO:0006936(muscle contraction)//GO:0009267(cellular response to starvation)	GO:0016459(myosin complex)//GO:0005737(cytoplasm)//GO:0030016(myofibril)//GO:0070062(extracellular exosome)//GO:0032982(myosin filament)//GO:0005859(muscle myosin complex)	GO:0005524(ATP binding)//GO:0005515(protein binding)//GO:0051015(actin filament binding)//GO:0003774(motor activity)//GO:0000166(nucleotide binding)//GO:0003779(actin binding)//GO:0005516(calmodulin binding)//GO:0000146(microfilament motor activity)
ENSG00000007129	2.03094	1.02215	0.00393896	0.0188958	up	67	48	2.6809	1.69019	chr19	41549518	41586844	+	chr19:41549518-41586844	CEACAM21	protein_coding	90273	CEACAM3|R29124_1	MIM:618191|HGNC:HGNC:28834|Ensembl:ENSG00000007129	19q13.2	CEA cell adhesion molecule 21			GO:0016020(membrane)//GO:0016021(integral component of membrane)
ENSG00000007312	3.20213	1.67903	0.00903825	0.0371537	up	20	9	1.01221	-0.465675	chr17	63928740	63932336	-	chr17:63928740-63932336	CD79B	protein_coding	974	AGM6|B29|IGB	MIM:147245|HGNC:HGNC:1699|Ensembl:ENSG00000007312	17q23.3	CD79b molecule	hsa04662(B cell receptor signaling pathway)	GO:0007166(cell surface receptor signaling pathway)//GO:0050853(B cell receptor signaling pathway)//GO:0002376(immune system process)//GO:0002250(adaptive immune response)//GO:0006955(immune response)//GO:0007165(signal transduction)//GO:0030183(B cell differentiation)	GO:0016020(membrane)//GO:0019815(B cell receptor complex)//GO:0016021(integral component of membrane)//GO:0005654(nucleoplasm)//GO:0005829(cytosol)//GO:0005886(plasma membrane)//GO:0009897(external side of plasma membrane)//GO:0070062(extracellular exosome)//GO:0005887(integral component of plasma membrane)	GO:0004888(transmembrane signaling receptor activity)//GO:0005515(protein binding)//GO:0042802(identical protein binding)
ENSG00000007350	2.36282	1.24051	1.75331e-07	3.44393e-06	up	399	246	5.22736	3.99402	chrX	154295795	154330350	+	chrX:154295795-154330350	TKTL1	protein_coding	8277	TKR|TKT2	MIM:300044|HGNC:HGNC:11835|Ensembl:ENSG00000007350	Xq28	transketolase like 1	hsa00030(Pentose phosphate pathway)//hsa01100(Metabolic pathways)//hsa01200(Carbon metabolism)//hsa01230(Biosynthesis of amino acids)	GO:0006007(glucose catabolic process)//GO:0006772(thiamine metabolic process)	GO:0005634(nucleus)//GO:0005737(cytoplasm)//GO:0005829(cytosol)	GO:0003824(catalytic activity)//GO:0046872(metal ion binding)//GO:0016740(transferase activity)//GO:0004802(transketolase activity)//GO:0030976(thiamine pyrophosphate binding)
ENSG00000007944	2.29043	1.19562	6.68009e-08	1.50317e-06	up	863	549	6.33729	5.14483	chr6	16129086	16148248	+	chr6:16129086-16148248	MYLIP	protein_coding	29116	IDOL|MIR	MIM:610082|HGNC:HGNC:21155|Ensembl:ENSG00000007944	6p22.3	myosin regulatory light chain interacting protein	hsa04979(Cholesterol metabolism)	GO:0016567(protein ubiquitination)//GO:0007399(nervous system development)//GO:0006511(ubiquitin-dependent protein catabolic process)//GO:0000209(protein polyubiquitination)//GO:0010977(negative regulation of neuron projection development)//GO:0032802(low-density lipoprotein particle receptor catabolic process)//GO:0010989(negative regulation of low-density lipoprotein particle clearance)//GO:003…	GO:0005856(cytoskeleton)//GO:0005737(cytoplasm)//GO:0016020(membrane)//GO:0005886(plasma membrane)//GO:0005829(cytosol)	GO:0008092(cytoskeletal protein binding)//GO:0046872(metal ion binding)//GO:0016740(transferase activity)//GO:0005515(protein binding)//GO:0004842(ubiquitin-protein transferase activity)//GO:0061630(ubiquitin protein ligase activity)
ENSG00000008086	7.51349	2.90948	3.37832e-12	2.35502e-10	up	78	15	2.89556	0.149505	chrX	18425583	18653629	+	chrX:18425583-18653629	CDKL5	protein_coding	6792	CFAP247|DEE2|EIEE2|ISSX|STK9	MIM:300203|HGNC:HGNC:11411|Ensembl:ENSG00000008086	Xp22.13	cyclin dependent kinase like 5		GO:0006468(protein phosphorylation)//GO:0016310(phosphorylation)//GO:0051726(regulation of cell cycle)//GO:1902017(regulation of cilium assembly)//GO:0043547(positive regulation of GTPase activity)//GO:0001764(neuron migration)//GO:0045773(positive regulation of axon extension)//GO:0046777(protein autophosphorylation)//GO:0050773(regulation of dendrite development)//GO:0050775(positive regulation…	GO:0005634(nucleus)//GO:0005737(cytoplasm)//GO:0005654(nucleoplasm)//GO:0005856(cytoskeleton)//GO:0042995(cell projection)//GO:0005815(microtubule organizing center)//GO:0005813(centrosome)//GO:0036064(ciliary basal body)//GO:0098978(glutamatergic synapse)//GO:0044294(dendritic growth cone)//GO:0032587(ruffle membrane)//GO:0032839(dendrite cytoplasm)//GO:0097542(ciliary tip)//GO:0045202(synapse)/…	GO:0005524(ATP binding)//GO:0004672(protein kinase activity)//GO:0000166(nucleotide binding)//GO:0004674(protein serine/threonine kinase activity)//GO:0016301(kinase activity)//GO:0016740(transferase activity)//GO:0005515(protein binding)//GO:0004693(cyclin-dependent protein serine/threonine kinase activity)//GO:0031267(small GTPase binding)
ENSG00000008517	2.36303	1.24064	0.000546742	0.00361299	up	65	40	2.63819	1.4402	chr16	3065297	3082192	+	chr16:3065297-3082192	IL32	protein_coding	9235	IL-32alpha|IL-32beta|IL-32delta|IL-32gamma|NK4|TAIF|TAIFa|TAIFb|TAIFc|TAIFd	MIM:606001|HGNC:HGNC:16830|Ensembl:ENSG00000008517	16p13.3	interleukin 32	hsa04060(Cytokine-cytokine receptor interaction)	GO:0006955(immune response)//GO:0007155(cell adhesion)//GO:0019221(cytokine-mediated signaling pathway)//GO:0006952(defense response)//GO:0010628(positive regulation of gene expression)//GO:1903901(negative regulation of viral life cycle)//GO:1905636(positive regulation of RNA polymerase II regulatory region sequence-specific DNA binding)//GO:0034346(positive regulation of type III interferon pro…	GO:0016020(membrane)//GO:0005576(extracellular region)//GO:0005615(extracellular space)//GO:0005829(cytosol)	GO:0005515(protein binding)//GO:0005125(cytokine activity)
ENSG00000008735	4.70964	2.23562	0.000313333	0.00226577	up	23	7	1.20011	-0.747149	chr22	50600793	50613981	+	chr22:50600793-50613981	MAPK8IP2	protein_coding	23542	IB-2|IB2|JIP2|PRKM8IPL	MIM:607755|HGNC:HGNC:6883|Ensembl:ENSG00000008735	22q13.33	mitogen-activated protein kinase 8 interacting protein 2	hsa04010(MAPK signaling pathway)	GO:0048813(dendrite morphogenesis)//GO:0060079(excitatory postsynaptic potential)//GO:0046328(regulation of JNK cascade)//GO:0010469(regulation of signaling receptor activity)//GO:0007172(signal complex assembly)//GO:2001234(negative regulation of apoptotic signaling pathway)//GO:0001662(behavioral fear response)//GO:0035176(social behavior)//GO:0051966(regulation of synaptic transmission, glutam…	GO:0005737(cytoplasm)//GO:0014069(postsynaptic density)//GO:0032991(protein-containing complex)//GO:0043025(neuronal cell body)	GO:0005515(protein binding)//GO:0019901(protein kinase binding)//GO:0001540(amyloid-beta binding)//GO:0005198(structural molecule activity)//GO:0019894(kinesin binding)//GO:0005078(MAP-kinase scaffold activity)//GO:0044877(protein-containing complex binding)
ENSG00000009694	2.06258	1.04445	0.0339961	0.108289	up	27	19	1.41774	0.449844	chrX	124375903	124963817	-	chrX:124375903-124963817	TENM1	protein_coding	10178	ODZ1|ODZ3|TEN-M1|TEN1|TNM|TNM1|ten-1	MIM:300588|HGNC:HGNC:8117|Ensembl:ENSG00000009694	Xq25	teneurin transmembrane protein 1		GO:0007165(signal transduction)//GO:0007218(neuropeptide signaling pathway)//GO:0033138(positive regulation of peptidyl-serine phosphorylation)//GO:0007399(nervous system development)//GO:0006955(immune response)//GO:0051491(positive regulation of filopodium assembly)//GO:0008285(negative regulation of cell population proliferation)//GO:0030838(positive regulation of actin filament polymerization…	GO:0016021(integral component of membrane)//GO:0005634(nucleus)//GO:0005737(cytoplasm)//GO:0016607(nuclear speck)//GO:0016020(membrane)//GO:0005783(endoplasmic reticulum)//GO:0005886(plasma membrane)//GO:0005856(cytoskeleton)//GO:0005794(Golgi apparatus)//GO:0048471(perinuclear region of cytoplasm)//GO:0005887(integral component of plasma membrane)//GO:0016363(nuclear matrix)//GO:0043005(neuron p…	GO:0042803(protein homodimerization activity)//GO:0046982(protein heterodimerization activity)//GO:0050839(cell adhesion molecule binding)//GO:0008201(heparin binding)//GO:0042802(identical protein binding)
ENSG00000009790	2.90524	1.53866	5.00765e-12	3.35026e-10	up	995	499	6.54228	5.00766	chr1	209756032	209782320	+	chr1:209756032-209782320	TRAF3IP3	protein_coding	80342	T3JAM	MIM:608255|HGNC:HGNC:30766|Ensembl:ENSG00000009790	1q32.2	TRAF3 interacting protein 3			GO:0016020(membrane)//GO:0016021(integral component of membrane)//GO:0005886(plasma membrane)//GO:0005794(Golgi apparatus)//GO:0005739(mitochondrion)//GO:0005765(lysosomal membrane)//GO:0005741(mitochondrial outer membrane)//GO:0000139(Golgi membrane)//GO:0005764(lysosome)	GO:0005515(protein binding)
ENSG00000010310	10.0679	3.33169	7.62713e-26	4.22395e-23	up	222	32	4.38602	1.13762	chr19	45668221	45683722	+	chr19:45668221-45683722	GIPR	protein_coding	2696	PGQTL2	MIM:137241|HGNC:HGNC:4271|Ensembl:ENSG00000010310	19q13.32	gastric inhibitory polypeptide receptor	hsa04024(cAMP signaling pathway)//hsa04080(Neuroactive ligand-receptor interaction)	GO:0007186(G protein-coupled receptor signaling pathway)//GO:0007166(cell surface receptor signaling pathway)//GO:0038192(gastric inhibitory peptide signaling pathway)//GO:0007165(signal transduction)//GO:0007188(adenylate cyclase-modulating G protein-coupled receptor signaling pathway)//GO:0006091(generation of precursor metabolites and energy)//GO:0007584(response to nutrient)//GO:0007190(activ…	GO:0016021(integral component of membrane)//GO:0016020(membrane)//GO:0005886(plasma membrane)	GO:0004930(G protein-coupled receptor activity)//GO:0016519(gastric inhibitory peptide receptor activity)//GO:0004888(transmembrane signaling receptor activity)//GO:0005515(protein binding)//GO:0008528(G protein-coupled peptide receptor activity)//GO:0017046(peptide hormone binding)
ENSG00000010626	2.0426	1.0304	0.00168847	0.00937164	up	80	57	2.93137	1.92774	chr12	6873569	6914241	+	chr12:6873569-6914241	LRRC23	protein_coding	10233	LRPB7	HGNC:HGNC:19138|Ensembl:ENSG00000010626	12p13.31	leucine rich repeat containing 23		GO:0008150(biological_process)	GO:0005737(cytoplasm)//GO:0005829(cytosol)//GO:0005575(cellular_component)	GO:0005515(protein binding)//GO:0003674(molecular_function)
ENSG00000010810	2.27172	1.18379	2.81727e-07	5.21523e-06	up	513	329	5.58868	4.4101	chr6	111660332	111873452	-	chr6:111660332-111873452	FYN	protein_coding	2534	SLK|SYN|p59-FYN	MIM:137025|HGNC:HGNC:4037|Ensembl:ENSG00000010810	6q21	FYN proto-oncogene, Src family tyrosine kinase	hsa04071(Sphingolipid signaling pathway)//hsa04072(Phospholipase D signaling pathway)//hsa04360(Axon guidance)//hsa04380(Osteoclast differentiation)//hsa04510(Focal adhesion)//hsa04520(Adherens junction)//hsa04611(Platelet activation)//hsa04650(Natural killer cell mediated cytotoxicity)//hsa04660(T cell receptor signaling pathway)//hsa04664(Fc epsilon RI signaling pathway)//hsa04725(Cholinergic s…	GO:0006468(protein phosphorylation)//GO:1904646(cellular response to amyloid-beta)//GO:1904645(response to amyloid-beta)//GO:1902951(negative regulation of dendritic spine maintenance)//GO:1903202(negative regulation of oxidative stress-induced cell death)//GO:0016310(phosphorylation)//GO:0007275(multicellular organism development)//GO:0016032(viral process)//GO:0002376(immune system process)//GO…	GO:0005634(nucleus)//GO:0005737(cytoplasm)//GO:0016020(membrane)//GO:0005829(cytosol)//GO:0005886(plasma membrane)//GO:0031234(extrinsic component of cytoplasmic side of plasma membrane)//GO:0044297(cell body)//GO:0005768(endosome)//GO:0045121(membrane raft)//GO:0014069(postsynaptic density)//GO:0048471(perinuclear region of cytoplasm)//GO:0030425(dendrite)//GO:0097386(glial cell projection)//GO:…	GO:0005524(ATP binding)//GO:0005515(protein binding)//GO:0004672(protein kinase activity)//GO:0004713(protein tyrosine kinase activity)//GO:0046872(metal ion binding)//GO:0000166(nucleotide binding)//GO:0016301(kinase activity)//GO:0016740(transferase activity)//GO:0004715(non-membrane spanning protein tyrosine kinase activity)//GO:0042802(identical protein binding)//GO:0005102(signaling receptor…
ENSG00000011600	2.39814	1.26192	2.78752e-08	7.07677e-07	up	637	387	5.90015	4.64286	chr19	35904401	35908295	-	chr19:35904401-35908295	TYROBP	protein_coding	7305	DAP12|KARAP|PLOSL|PLOSL1	MIM:604142|HGNC:HGNC:12449|Ensembl:ENSG00000011600	19q13.12	transmembrane immune signaling adaptor TYROBP	hsa04380(Osteoclast differentiation)//hsa04650(Natural killer cell mediated cytotoxicity)	GO:0010628(positive regulation of gene expression)//GO:0032693(negative regulation of interleukin-10 production)//GO:0048678(response to axon injury)//GO:0032731(positive regulation of interleukin-1 beta production)//GO:0032760(positive regulation of tumor necrosis factor production)//GO:0032755(positive regulation of interleukin-6 production)//GO:1900272(negative regulation of long-term synaptic…	GO:0016020(membrane)//GO:0016021(integral component of membrane)//GO:0005886(plasma membrane)//GO:0009986(cell surface)//GO:0005887(integral component of plasma membrane)//GO:0030667(secretory granule membrane)	GO:0046872(metal ion binding)//GO:0042803(protein homodimerization activity)//GO:0005515(protein binding)//GO:0042802(identical protein binding)//GO:0005102(signaling receptor binding)
ENSG00000011638	2.01649	1.01184	0.000195912	0.00151685	up	162	117	3.9352	2.93643	chr16	21158377	21180616	+	chr16:21158377-21180616	TMEM159	protein_coding	57146	-	MIM:611304|HGNC:HGNC:30136|Ensembl:ENSG00000011638	16p12.3	transmembrane protein 159		GO:0140042(lipid droplet formation)	GO:0016020(membrane)//GO:0016021(integral component of membrane)//GO:0005783(endoplasmic reticulum)//GO:0005789(endoplasmic reticulum membrane)//GO:0005811(lipid droplet)	GO:0005515(protein binding)
ENSG00000012171	2.97585	1.5733	0.000560744	0.00368597	up	39	19	1.92369	0.449844	chr3	50267558	50277546	+	chr3:50267558-50277546	SEMA3B	protein_coding	7869	LUCA-1|SEMA5|SEMAA|SemA|semaV	MIM:601281|HGNC:HGNC:10724|Ensembl:ENSG00000012171	3p21.31	semaphorin 3B	hsa04360(Axon guidance)	GO:0007267(cell-cell signaling)//GO:0007411(axon guidance)//GO:0001755(neural crest cell migration)//GO:0030335(positive regulation of cell migration)//GO:0048843(negative regulation of axon extension involved in axon guidance)//GO:0050919(negative chemotaxis)//GO:0071526(semaphorin-plexin signaling pathway)//GO:0061643(chemorepulsion of axon)	GO:0005783(endoplasmic reticulum)//GO:0005576(extracellular region)//GO:0005615(extracellular space)//GO:0005887(integral component of plasma membrane)//GO:0062023(collagen-containing extracellular matrix)	GO:0005515(protein binding)//GO:0030215(semaphorin receptor binding)//GO:0045499(chemorepellent activity)
ENSG00000012223	266.387	8.05738	1.24618e-08	3.4993e-07	up	27	0	1.41774	-2.77056	chr3	46435645	46485234	-	chr3:46435645-46485234	LTF	protein_coding	4057	GIG12|HEL110|HLF2|LF	MIM:150210|HGNC:HGNC:6720|Ensembl:ENSG00000012223	3p21.31	lactotransferrin		GO:0001817(regulation of cytokine production)//GO:0019731(antibacterial humoral response)//GO:0019732(antifungal humoral response)//GO:0043066(negative regulation of apoptotic process)//GO:0006811(ion transport)//GO:0006508(proteolysis)//GO:0002376(immune system process)//GO:0001503(ossification)//GO:0042742(defense response to bacterium)//GO:0055072(iron ion homeostasis)//GO:0050829(defense resp…	GO:0005576(extracellular region)//GO:0005615(extracellular space)//GO:0005634(nucleus)//GO:0005737(cytoplasm)//GO:0009986(cell surface)//GO:0005886(plasma membrane)//GO:0070062(extracellular exosome)//GO:0032991(protein-containing complex)//GO:0005769(early endosome)//GO:0042581(specific granule)//GO:0035580(specific granule lumen)//GO:1904724(tertiary granule lumen)//GO:0055037(recycling endosom…	GO:0005506(iron ion binding)//GO:0004252(serine-type endopeptidase activity)//GO:0046872(metal ion binding)//GO:0008233(peptidase activity)//GO:0016787(hydrolase activity)//GO:0003677(DNA binding)//GO:0005515(protein binding)//GO:0008201(heparin binding)//GO:0008236(serine-type peptidase activity)//GO:0043539(protein serine/threonine kinase activator activity)//GO:0001530(lipopolysaccharide bindi…
ENSG00000012779	5.81512	2.53981	5.34895e-25	2.5391e-22	up	619	155	5.8589	3.3354	chr10	45374176	45446119	+	chr10:45374176-45446119	ALOX5	protein_coding	240	5-LO|5-LOX|5LPG|LOG5	MIM:152390|HGNC:HGNC:435|Ensembl:ENSG00000012779	10q11.21	arachidonate 5-lipoxygenase	hsa00590(Arachidonic acid metabolism)//hsa01100(Metabolic pathways)//hsa04664(Fc epsilon RI signaling pathway)//hsa04726(Serotonergic synapse)//hsa04913(Ovarian steroidogenesis)//hsa05145(Toxoplasmosis)	GO:0055114(oxidation-reduction process)//GO:0019370(leukotriene biosynthetic process)//GO:0019369(arachidonic acid metabolic process)//GO:0050728(negative regulation of inflammatory response)//GO:0016525(negative regulation of angiogenesis)//GO:0043312(neutrophil degranulation)//GO:0030501(positive regulation of bone mineralization)//GO:0050796(regulation of insulin secretion)//GO:0019221(cytokin…	GO:0005634(nucleus)//GO:0005737(cytoplasm)//GO:0016020(membrane)//GO:0005654(nucleoplasm)//GO:0005829(cytosol)//GO:0005615(extracellular space)//GO:0031965(nuclear membrane)//GO:0048471(perinuclear region of cytoplasm)//GO:0005576(extracellular region)//GO:0016363(nuclear matrix)//GO:0005635(nuclear envelope)//GO:0034774(secretory granule lumen)//GO:1904813(ficolin-1-rich granule lumen)//GO:00056…	GO:0046872(metal ion binding)//GO:0005515(protein binding)//GO:0016702(oxidoreductase activity, acting on single donors with incorporation of molecular oxygen, incorporation of two atoms of oxygen)//GO:0005506(iron ion binding)//GO:0016491(oxidoreductase activity)//GO:0016787(hydrolase activity)//GO:0051213(dioxygenase activity)//GO:0004051(arachidonate 5-lipoxygenase activity)
ENSG00000012822	2.99674	1.58339	2.33778e-10	1.05211e-08	up	321	156	4.91492	3.34455	chr12	53708517	53727745	-	chr12:53708517-53727745	CALCOCO1	protein_coding	57658	Cocoa|PP13275|calphoglin	HGNC:HGNC:29306|Ensembl:ENSG00000012822	12q13.13	calcium binding and coiled-coil domain 1		GO:0016055(Wnt signaling pathway)//GO:0045893(positive regulation of transcription, DNA-templated)//GO:0045944(positive regulation of transcription by RNA polymerase II)//GO:0010628(positive regulation of gene expression)//GO:0007165(signal transduction)//GO:0030518(intracellular steroid hormone receptor signaling pathway)	GO:0005634(nucleus)//GO:0005737(cytoplasm)//GO:0043231(intracellular membrane-bounded organelle)//GO:0005829(cytosol)//GO:0000785(chromatin)	GO:0046872(metal ion binding)//GO:0005515(protein binding)//GO:0003713(transcription coactivator activity)//GO:0008022(protein C-terminus binding)//GO:0000976(transcription regulatory region sequence-specific DNA binding)//GO:0000978(RNA polymerase II cis-regulatory region sequence-specific DNA binding)//GO:0003712(transcription coregulator activity)//GO:0070016(armadillo repeat domain binding)//…
ENSG00000013392	2.3545	1.23542	0.000144088	0.00116728	up	89	55	3.08237	1.87823	chr6	83193357	83198935	+	chr6:83193357-83198935	RWDD2A	protein_coding	112611	RWDD2|dJ747H23.2	HGNC:HGNC:21385|Ensembl:ENSG00000013392	6q14.1	RWD domain containing 2A				GO:0005515(protein binding)
ENSG00000013619	3.70862	1.89088	0.0250426	0.0847795	up	13	5	0.446089	-1.09718	chrX	150361422	150514178	+	chrX:150361422-150514178	MAMLD1	protein_coding	10046	CG1|CXorf6|F18|HYSP2	MIM:300120|HGNC:HGNC:2568|Ensembl:ENSG00000013619	Xq28	mastermind like domain containing 1		GO:0006357(regulation of transcription by RNA polymerase II)//GO:0008584(male gonad development)	GO:0005634(nucleus)//GO:0005794(Golgi apparatus)//GO:0005654(nucleoplasm)//GO:0016604(nuclear body)//GO:0005813(centrosome)	GO:0003674(molecular_function)
ENSG00000013725	3.36143	1.74907	0.00616054	0.0270534	up	21	9	1.0776	-0.465675	chr11	60971680	61020377	+	chr11:60971680-61020377	CD6	protein_coding	923	TP120	MIM:186720|HGNC:HGNC:1691|Ensembl:ENSG00000013725	11q12.2	CD6 molecule	hsa04514(Cell adhesion molecules)	GO:0007155(cell adhesion)//GO:0002376(immune system process)//GO:0045087(innate immune response)//GO:0002250(adaptive immune response)//GO:0006897(endocytosis)//GO:0042102(positive regulation of T cell proliferation)//GO:0032496(response to lipopolysaccharide)//GO:0007157(heterophilic cell-cell adhesion via plasma membrane cell adhesion molecules)//GO:0031663(lipopolysaccharide-mediated signaling…	GO:0016020(membrane)//GO:0016021(integral component of membrane)//GO:0005886(plasma membrane)//GO:0005576(extracellular region)//GO:0009897(external side of plasma membrane)//GO:0042101(T cell receptor complex)//GO:0005887(integral component of plasma membrane)//GO:0031226(intrinsic component of plasma membrane)//GO:0001772(immunological synapse)	GO:0005044(scavenger receptor activity)//GO:0005515(protein binding)//GO:0042802(identical protein binding)//GO:0001530(lipopolysaccharide binding)//GO:0070891(lipoteichoic acid binding)
ENSG00000018189	2.29298	1.19723	8.17789e-07	1.34081e-05	up	340	216	4.99748	3.80824	chr4	70704204	70808619	+	chr4:70704204-70808619	RUFY3	protein_coding	22902	RIPX|SINGAR1|ZFYVE30	MIM:611194|HGNC:HGNC:30285|Ensembl:ENSG00000018189	4q13.3	RUN and FYVE domain containing 3		GO:0007275(multicellular organism development)//GO:0030154(cell differentiation)//GO:0007399(nervous system development)//GO:0045773(positive regulation of axon extension)//GO:2000114(regulation of establishment of cell polarity)//GO:0007015(actin filament organization)//GO:0030335(positive regulation of cell migration)//GO:0090316(positive regulation of intracellular protein transport)//GO:00507…	GO:0005737(cytoplasm)//GO:0016020(membrane)//GO:0005829(cytosol)//GO:0030054(cell junction)//GO:0030175(filopodium)//GO:0042995(cell projection)//GO:0030425(dendrite)//GO:0012505(endomembrane system)//GO:0030424(axon)//GO:0043204(perikaryon)//GO:0030027(lamellipodium)//GO:0030426(growth cone)//GO:0043025(neuronal cell body)//GO:0071437(invadopodium)	GO:0005515(protein binding)//GO:0046872(metal ion binding)
ENSG00000018236	3.62376	1.85749	8.76189e-06	0.000106646	up	50	20	2.26984	0.516085	chr12	40692439	41072415	+	chr12:40692439-41072415	CNTN1	protein_coding	1272	F3|GP135|MYPCN	MIM:600016|HGNC:HGNC:2171|Ensembl:ENSG00000018236	12q12	contactin 1	hsa04514(Cell adhesion molecules)	GO:0007399(nervous system development)//GO:0031175(neuron projection development)//GO:0007155(cell adhesion)//GO:0007219(Notch signaling pathway)//GO:0010628(positive regulation of gene expression)//GO:0010765(positive regulation of sodium ion transport)//GO:0010976(positive regulation of neuron projection development)//GO:0021549(cerebellum development)//GO:0050731(positive regulation of peptidy…	GO:0016020(membrane)//GO:0005886(plasma membrane)//GO:0031225(anchored component of membrane)//GO:0070062(extracellular exosome)//GO:0045121(membrane raft)//GO:0099025(anchored component of postsynaptic membrane)//GO:0099026(anchored component of presynaptic membrane)	GO:0005515(protein binding)//GO:0030246(carbohydrate binding)
ENSG00000018280	2.5855	1.37044	5.34412e-05	0.000502337	up	80	45	2.93137	1.60145	chr2	218382029	218396894	+	chr2:218382029-218396894	SLC11A1	protein_coding	6556	LSH|NRAMP|NRAMP1	MIM:600266|HGNC:HGNC:10907|Ensembl:ENSG00000018280	2q35	solute carrier family 11 member 1	hsa04142(Lysosome)	GO:0030001(metal ion transport)//GO:0010628(positive regulation of gene expression)//GO:0045944(positive regulation of transcription by RNA polymerase II)//GO:0042742(defense response to bacterium)//GO:0006811(ion transport)//GO:0055072(iron ion homeostasis)//GO:0032496(response to lipopolysaccharide)//GO:0043312(neutrophil degranulation)//GO:0071421(manganese ion transmembrane transport)//GO:003…	GO:0016020(membrane)//GO:0016021(integral component of membrane)//GO:0005886(plasma membrane)//GO:0005887(integral component of plasma membrane)//GO:0070821(tertiary granule membrane)//GO:0005770(late endosome)//GO:0101003(ficolin-1-rich granule membrane)//GO:0005764(lysosome)//GO:0010008(endosome membrane)//GO:0030670(phagocytic vesicle membrane)//GO:0031902(late endosome membrane)//GO:0005575(c…	GO:0046873(metal ion transmembrane transporter activity)//GO:0042803(protein homodimerization activity)//GO:0005381(iron ion transmembrane transporter activity)//GO:0005384(manganese ion transmembrane transporter activity)//GO:0015086(cadmium ion transmembrane transporter activity)//GO:0046915(transition metal ion transmembrane transporter activity)//GO:0051139(metal ion:proton antiporter activit…
ENSG00000018408	3.16772	1.66344	0.000429203	0.00293451	up	35	16	1.77393	0.230651	chr3	149517235	149736714	-	chr3:149517235-149736714	WWTR1	protein_coding	25937	TAZ	MIM:607392|HGNC:HGNC:24042|Ensembl:ENSG00000018408	3q25.1	WW domain containing transcription regulator 1	hsa04390(Hippo signaling pathway)//hsa04392(Hippo signaling pathway - multiple species)	GO:0045669(positive regulation of osteoblast differentiation)//GO:0090090(negative regulation of canonical Wnt signaling pathway)//GO:0045599(negative regulation of fat cell differentiation)//GO:0006469(negative regulation of protein kinase activity)//GO:0035329(hippo signaling)//GO:0006355(regulation of transcription, DNA-templated)//GO:0045944(positive regulation of transcription by RNA polymer…	GO:0005737(cytoplasm)//GO:0005634(nucleus)//GO:0016020(membrane)//GO:0005654(nucleoplasm)//GO:0005829(cytosol)//GO:0005886(plasma membrane)//GO:0016604(nuclear body)//GO:0005667(transcription regulator complex)	GO:0005515(protein binding)//GO:0003713(transcription coactivator activity)//GO:0003714(transcription corepressor activity)//GO:0042803(protein homodimerization activity)
ENSG00000019169	3.82151	1.93414	0.000104191	0.000884863	up	37	14	1.85075	0.0635202	chr2	118942194	118994660	+	chr2:118942194-118994660	MARCO	protein_coding	8685	SCARA2|SR-A6	MIM:604870|HGNC:HGNC:6895|Ensembl:ENSG00000019169	2q14.2	macrophage receptor with collagenous structure	hsa04145(Phagosome)	GO:0001934(positive regulation of protein phosphorylation)//GO:0002376(immune system process)//GO:0045087(innate immune response)//GO:0006898(receptor-mediated endocytosis)//GO:0007166(cell surface receptor signaling pathway)//GO:0006897(endocytosis)//GO:0070374(positive regulation of ERK1 and ERK2 cascade)//GO:0097242(amyloid-beta clearance)//GO:0006911(phagocytosis, engulfment)//GO:0007193(aden…	GO:0016020(membrane)//GO:0005737(cytoplasm)//GO:0005886(plasma membrane)//GO:0016021(integral component of membrane)//GO:0005581(collagen trimer)//GO:0005887(integral component of plasma membrane)//GO:0030666(endocytic vesicle membrane)	GO:0005044(scavenger receptor activity)//GO:0001664(G protein-coupled receptor binding)//GO:0001540(amyloid-beta binding)//GO:0004888(transmembrane signaling receptor activity)//GO:0038024(cargo receptor activity)//GO:0038187(pattern recognition receptor activity)
ENSG00000019505	118.95	6.89421	0.000187	0.00145804	up	12	0	0.343487	-2.77056	chr11	45240302	45286341	-	chr11:45240302-45286341	SYT13	protein_coding	57586	-	MIM:607716|HGNC:HGNC:14962|Ensembl:ENSG00000019505	11p11.2	synaptotagmin 13		GO:0016192(vesicle-mediated transport)//GO:0006906(vesicle fusion)//GO:0014059(regulation of dopamine secretion)//GO:0017156(calcium-ion regulated exocytosis)//GO:0017158(regulation of calcium ion-dependent exocytosis)//GO:0071277(cellular response to calcium ion)	GO:0016020(membrane)//GO:0016021(integral component of membrane)//GO:0043231(intracellular membrane-bounded organelle)//GO:0005886(plasma membrane)//GO:0045202(synapse)//GO:0030424(axon)//GO:0070382(exocytic vesicle)//GO:0030133(transport vesicle)//GO:0005887(integral component of plasma membrane)	GO:0005509(calcium ion binding)//GO:0005544(calcium-dependent phospholipid binding)//GO:0000149(SNARE binding)//GO:0001786(phosphatidylserine binding)//GO:0030276(clathrin binding)
ENSG00000019582	2.42394	1.27736	1.37347e-09	5.02439e-08	up	3563	2142	8.38097	7.10446	chr5	150400041	150412969	-	chr5:150400041-150412969	CD74	protein_coding	972	DHLAG|HLADG|II|Ia-GAMMA|p33	MIM:142790|HGNC:HGNC:1697|Ensembl:ENSG00000019582	5q33.1	CD74 molecule	hsa04612(Antigen processing and presentation)//hsa05152(Tuberculosis)//hsa05168(Herpes simplex virus 1 infection)	GO:0006955(immune response)//GO:0019882(antigen processing and presentation)//GO:0006886(intracellular protein transport)//GO:0070206(protein trimerization)//GO:0030336(negative regulation of cell migration)//GO:0010628(positive regulation of gene expression)//GO:0070374(positive regulation of ERK1 and ERK2 cascade)//GO:0048146(positive regulation of fibroblast proliferation)//GO:0032755(positive…	GO:0016021(integral component of membrane)//GO:0016020(membrane)//GO:0005737(cytoplasm)//GO:0005886(plasma membrane)//GO:0005634(nucleus)//GO:0005783(endoplasmic reticulum)//GO:0005789(endoplasmic reticulum membrane)//GO:0005794(Golgi apparatus)//GO:0005768(endosome)//GO:0005770(late endosome)//GO:0005764(lysosome)//GO:0070062(extracellular exosome)//GO:0009986(cell surface)//GO:0032588(trans-Gol…	GO:0042289(MHC class II protein binding)//GO:0035718(macrophage migration inhibitory factor binding)//GO:0005515(protein binding)//GO:0042802(identical protein binding)//GO:0004896(cytokine receptor activity)//GO:0019955(cytokine binding)//GO:0001540(amyloid-beta binding)//GO:0023026(MHC class II protein complex binding)//GO:0042609(CD4 receptor binding)//GO:0042658(MHC class II protein binding, …
ENSG00000021826	4.5555	2.18761	7.29297e-06	9.11599e-05	up	41	13	1.99312	-0.0279156	chr2	210477682	210679107	+	chr2:210477682-210679107	CPS1	protein_coding	1373	CPSASE1|PHN	MIM:608307|HGNC:HGNC:2323|Ensembl:ENSG00000021826	2q34	carbamoyl-phosphate synthase 1	hsa00220(Arginine biosynthesis)//hsa00250(Alanine, aspartate and glutamate metabolism)//hsa00910(Nitrogen metabolism)//hsa01100(Metabolic pathways)//hsa01200(Carbon metabolism)//hsa01230(Biosynthesis of amino acids)	GO:0006207('de novo' pyrimidine nucleobase biosynthetic process)//GO:0006807(nitrogen compound metabolic process)//GO:0006541(glutamine metabolic process)//GO:0008152(metabolic process)//GO:0006508(proteolysis)//GO:0000050(urea cycle)//GO:0032496(response to lipopolysaccharide)//GO:0019240(citrulline biosynthetic process)//GO:0019433(triglyceride catabolic process)//GO:0050667(homocysteine metabo…	GO:0005634(nucleus)//GO:0005730(nucleolus)//GO:0005739(mitochondrion)//GO:0005737(cytoplasm)//GO:0005759(mitochondrial matrix)//GO:0042645(mitochondrial nucleoid)//GO:0005743(mitochondrial inner membrane)//GO:0032991(protein-containing complex)	GO:0046872(metal ion binding)//GO:0005524(ATP binding)//GO:0004088(carbamoyl-phosphate synthase (glutamine-hydrolyzing) activity)//GO:0000166(nucleotide binding)//GO:0003824(catalytic activity)//GO:0016874(ligase activity)//GO:0005515(protein binding)//GO:0072341(modified amino acid binding)//GO:0004087(carbamoyl-phosphate synthase (ammonia) activity)//GO:0004175(endopeptidase activity)//GO:00055…
ENSG00000022267	2.37741	1.24939	3.8665e-07	6.87045e-06	up	315	193	4.88783	3.64761	chrX	136146702	136211359	+	chrX:136146702-136211359	FHL1	protein_coding	2273	FCMSU|FHL-1|FHL1A|FHL1B|FLH1A|KYOT|RBMX1A|RBMX1B|SLIM|SLIM-1|SLIM1|SLIMMER|XMPMA	MIM:300163|HGNC:HGNC:3702|Ensembl:ENSG00000022267	Xq26.3	four and a half LIM domains 1	hsa04630(JAK-STAT signaling pathway)	GO:0007517(muscle organ development)//GO:0007275(multicellular organism development)//GO:0030154(cell differentiation)//GO:0030308(negative regulation of cell growth)//GO:2000134(negative regulation of G1/S transition of mitotic cell cycle)//GO:1901016(regulation of potassium ion transmembrane transporter activity)//GO:0009887(animal organ morphogenesis)//GO:0010972(negative regulation of G2/M tr…	GO:0005634(nucleus)//GO:0005737(cytoplasm)//GO:0005829(cytosol)//GO:0005886(plasma membrane)//GO:0005925(focal adhesion)	GO:0046872(metal ion binding)//GO:0005515(protein binding)//GO:0044325(ion channel binding)//GO:0003674(molecular_function)
ENSG00000023839	3.59933	1.84773	2.12076e-08	5.54876e-07	up	104	42	3.30347	1.50688	chr10	99782640	99852594	+	chr10:99782640-99852594	ABCC2	protein_coding	1244	ABC30|CMOAT|DJS|MRP2|cMRP	MIM:601107|HGNC:HGNC:53|Ensembl:ENSG00000023839	10q24.2	ATP binding cassette subfamily C member 2	hsa01523(Antifolate resistance)//hsa01524(Platinum drug resistance)//hsa02010(ABC transporters)//hsa04976(Bile secretion)	GO:0055085(transmembrane transport)//GO:0015711(organic anion transport)//GO:0010629(negative regulation of gene expression)//GO:0150104(transport across blood-brain barrier)//GO:1990962(xenobiotic transport across blood-brain barrier)//GO:0006855(drug transmembrane transport)//GO:0015721(bile acid and bile salt transport)//GO:0046618(drug export)//GO:0070633(transepithelial transport)//GO:000695…	GO:0005887(integral component of plasma membrane)//GO:0016020(membrane)//GO:0016021(integral component of membrane)//GO:0005886(plasma membrane)//GO:0016324(apical plasma membrane)//GO:0009986(cell surface)//GO:0031526(brush border membrane)//GO:0046581(intercellular canaliculus)//GO:0046691(intracellular canaliculus)	GO:0042626(ATPase-coupled transmembrane transporter activity)//GO:0008514(organic anion transmembrane transporter activity)//GO:0005524(ATP binding)//GO:0022857(transmembrane transporter activity)//GO:0016887(ATPase activity)//GO:0000166(nucleotide binding)//GO:0005515(protein binding)//GO:0008559(ATPase-coupled xenobiotic transmembrane transporter activity)//GO:0042910(xenobiotic transmembrane t…
ENSG00000024422	2.81776	1.49455	7.06905e-07	1.18235e-05	up	122	63	3.53061	2.06683	chr19	47713422	47743134	+	chr19:47713422-47743134	EHD2	protein_coding	30846	PAST2	MIM:605890|HGNC:HGNC:3243|Ensembl:ENSG00000024422	19q13.33	EH domain containing 2	hsa04144(Endocytosis)	GO:0030036(actin cytoskeleton organization)//GO:0032456(endocytic recycling)//GO:0060271(cilium assembly)//GO:0016197(endosomal transport)//GO:1901741(positive regulation of myoblast fusion)//GO:0072659(protein localization to plasma membrane)//GO:0007596(blood coagulation)//GO:0006897(endocytosis)//GO:0097320(plasma membrane tubulation)//GO:2001137(positive regulation of endocytic recycling)//GO…	GO:0005737(cytoplasm)//GO:0016020(membrane)//GO:0005886(plasma membrane)//GO:0005768(endosome)//GO:0005901(caveola)//GO:0045171(intercellular bridge)//GO:0005829(cytosol)//GO:0010008(endosome membrane)//GO:0015630(microtubule cytoskeleton)//GO:0055038(recycling endosome membrane)//GO:0043231(intracellular membrane-bounded organelle)//GO:0070062(extracellular exosome)//GO:0019898(extrinsic compone…	GO:0005515(protein binding)//GO:0005525(GTP binding)//GO:0005509(calcium ion binding)//GO:0046872(metal ion binding)//GO:0000166(nucleotide binding)//GO:0005524(ATP binding)//GO:0016787(hydrolase activity)//GO:0003676(nucleic acid binding)//GO:0019904(protein domain specific binding)//GO:0042802(identical protein binding)
ENSG00000025039	2.29158	1.19634	6.71283e-08	1.50883e-06	up	854	543	6.3222	5.12904	chr6	89364616	89412273	-	chr6:89364616-89412273	RRAGD	protein_coding	58528	RAGD|bA11D8.2.1	MIM:608268|HGNC:HGNC:19903|Ensembl:ENSG00000025039	6q15	Ras related GTP binding D	hsa04140(Autophagy - animal)//hsa04150(mTOR signaling pathway)//hsa05131(Shigellosis)	GO:0071230(cellular response to amino acid stimulus)//GO:0010506(regulation of autophagy)//GO:0032008(positive regulation of TOR signaling)//GO:0007050(cell cycle arrest)//GO:0016241(regulation of macroautophagy)//GO:0034613(cellular protein localization)//GO:0009267(cellular response to starvation)//GO:0071233(cellular response to leucine)//GO:1990253(cellular response to leucine starvation)//GO…	GO:0005634(nucleus)//GO:0005737(cytoplasm)//GO:0043231(intracellular membrane-bounded organelle)//GO:0005654(nucleoplasm)//GO:0005813(centrosome)//GO:0005764(lysosome)//GO:0005829(cytosol)//GO:0034448(EGO complex)//GO:1990131(Gtr1-Gtr2 GTPase complex)	GO:0005525(GTP binding)//GO:0000166(nucleotide binding)//GO:0016787(hydrolase activity)//GO:0005515(protein binding)//GO:0003924(GTPase activity)//GO:0046982(protein heterodimerization activity)//GO:0019003(GDP binding)//GO:0051020(GTPase binding)
ENSG00000025423	2.29066	1.19577	0.00619366	0.027152	up	41	26	1.99312	0.860069	chr12	56752161	56787790	+	chr12:56752161-56787790	HSD17B6	protein_coding	8630	HSE|RODH|SDR9C6	MIM:606623|HGNC:HGNC:23316|Ensembl:ENSG00000025423	12q13.3	hydroxysteroid 17-beta dehydrogenase 6	hsa00140(Steroid hormone biosynthesis)//hsa00830(Retinol metabolism)//hsa01100(Metabolic pathways)//hsa01240(Biosynthesis of cofactors)	GO:0055114(oxidation-reduction process)//GO:0006629(lipid metabolic process)//GO:0008202(steroid metabolic process)//GO:0022900(electron transport chain)//GO:0006702(androgen biosynthetic process)//GO:0006710(androgen catabolic process)//GO:0062175(brexanolone catabolic process)	GO:0016020(membrane)//GO:0005783(endoplasmic reticulum)//GO:0031090(organelle membrane)//GO:0043231(intracellular membrane-bounded organelle)//GO:0005768(endosome)//GO:0031901(early endosome membrane)	GO:0016491(oxidoreductase activity)//GO:0004303(estradiol 17-beta-dehydrogenase activity)//GO:0009055(electron transfer activity)//GO:0003824(catalytic activity)//GO:0004745(retinol dehydrogenase activity)//GO:0047023(androsterone dehydrogenase activity)//GO:0047024(5alpha-androstane-3beta,17beta-diol dehydrogenase activity)//GO:0047035(testosterone dehydrogenase (NAD+) activity)//GO:0047044(andr…
ENSG00000026950	2.77804	1.47407	7.84534e-08	1.73214e-06	up	187	98	4.14039	2.68612	chr6	26402237	26415208	+	chr6:26402237-26415208	BTN3A1	protein_coding	11119	BT3.1|BTF5|BTN3.1|CD277	MIM:613593|HGNC:HGNC:1138|Ensembl:ENSG00000026950	6p22.2	butyrophilin subfamily 3 member A1		GO:0002376(immune system process)//GO:0002250(adaptive immune response)//GO:0001817(regulation of cytokine production)//GO:0050852(T cell receptor signaling pathway)//GO:0001816(cytokine production)//GO:0032609(interferon-gamma production)//GO:0050798(activated T cell proliferation)	GO:0016020(membrane)//GO:0016021(integral component of membrane)//GO:0005886(plasma membrane)//GO:0009897(external side of plasma membrane)	GO:0005515(protein binding)//GO:0005102(signaling receptor binding)
ENSG00000028137	2.60558	1.3816	4.66435e-10	1.9017e-08	up	946	529	6.46954	5.09152	chr1	12166991	12209228	+	chr1:12166991-12209228	TNFRSF1B	protein_coding	7133	CD120b|TBPII|TNF-R-II|TNF-R75|TNFBR|TNFR1B|TNFR2|TNFR80|p75|p75TNFR	MIM:191191|HGNC:HGNC:11917|Ensembl:ENSG00000028137	1p36.22	TNF receptor superfamily member 1B	hsa04060(Cytokine-cytokine receptor interaction)//hsa04061(Viral protein interaction with cytokine and cytokine receptor)//hsa04668(TNF signaling pathway)//hsa04920(Adipocytokine signaling pathway)//hsa05014(Amyotrophic lateral sclerosis)//hsa05022(Pathways of neurodegeneration - multiple diseases)//hsa05170(Human immunodeficiency virus 1 infection)	GO:0006954(inflammatory response)//GO:1901215(negative regulation of neuron death)//GO:0150079(negative regulation of neuroinflammatory response)//GO:0033209(tumor necrosis factor-mediated signaling pathway)//GO:0071222(cellular response to lipopolysaccharide)//GO:0006915(apoptotic process)//GO:0043312(neutrophil degranulation)//GO:0008630(intrinsic apoptotic signaling pathway in response to DNA …	GO:0016020(membrane)//GO:0016021(integral component of membrane)//GO:0005886(plasma membrane)//GO:0005576(extracellular region)//GO:0035579(specific granule membrane)//GO:0045121(membrane raft)//GO:0002947(tumor necrosis factor receptor superfamily complex)//GO:0005634(nucleus)//GO:0030424(axon)//GO:0043025(neuronal cell body)//GO:0043196(varicosity)//GO:0048471(perinuclear region of cytoplasm)	GO:0005515(protein binding)//GO:0005031(tumor necrosis factor-activated receptor activity)//GO:0031625(ubiquitin protein ligase binding)//GO:0043120(tumor necrosis factor binding)
ENSG00000030582	2.00774	1.00557	1.90447e-06	2.82091e-05	up	2345	1702	7.7778	6.77313	chr17	44345246	44353106	+	chr17:44345246-44353106	GRN	protein_coding	2896	CLN11|GEP|GP88|PCDGF|PEPI|PGRN	MIM:138945|HGNC:HGNC:4601|Ensembl:ENSG00000030582	17q21.31	granulin precursor		GO:0030335(positive regulation of cell migration)//GO:0050821(protein stabilization)//GO:0043312(neutrophil degranulation)//GO:0043524(negative regulation of neuron apoptotic process)//GO:0007165(signal transduction)//GO:0045766(positive regulation of angiogenesis)//GO:0010595(positive regulation of endothelial cell migration)//GO:0007040(lysosome organization)//GO:0007041(lysosomal transport)//G…	GO:0016020(membrane)//GO:0005783(endoplasmic reticulum)//GO:0005886(plasma membrane)//GO:0005794(Golgi apparatus)//GO:0005770(late endosome)//GO:0005765(lysosomal membrane)//GO:0005576(extracellular region)//GO:0005615(extracellular space)//GO:0005764(lysosome)//GO:0005802(trans-Golgi network)//GO:0005768(endosome)//GO:0070062(extracellular exosome)//GO:0035578(azurophil granule lumen)	GO:0003723(RNA binding)//GO:0005515(protein binding)//GO:0005125(cytokine activity)//GO:0051087(chaperone binding)//GO:0008083(growth factor activity)
ENSG00000035664	11.0962	3.472	2.39489e-25	1.29046e-22	up	199	26	4.2294	0.860069	chr15	63907036	64072033	-	chr15:63907036-64072033	DAPK2	protein_coding	23604	DRP-1|DRP1	MIM:616567|HGNC:HGNC:2675|Ensembl:ENSG00000035664	15q22.31	death associated protein kinase 2	hsa04140(Autophagy - animal)//hsa05200(Pathways in cancer)//hsa05219(Bladder cancer)	GO:0006468(protein phosphorylation)//GO:0016310(phosphorylation)//GO:0006915(apoptotic process)//GO:0035556(intracellular signal transduction)//GO:0042981(regulation of apoptotic process)//GO:0043065(positive regulation of apoptotic process)//GO:0046777(protein autophosphorylation)//GO:0010506(regulation of autophagy)//GO:0090023(positive regulation of neutrophil chemotaxis)//GO:2001242(regulatio…	GO:0005737(cytoplasm)//GO:0005794(Golgi apparatus)//GO:0043231(intracellular membrane-bounded organelle)//GO:0031410(cytoplasmic vesicle)//GO:0005634(nucleus)//GO:0034423(autophagosome lumen)//GO:0016020(membrane)//GO:0016021(integral component of membrane)	GO:0005524(ATP binding)//GO:0004672(protein kinase activity)//GO:0000166(nucleotide binding)//GO:0004674(protein serine/threonine kinase activity)//GO:0016301(kinase activity)//GO:0016740(transferase activity)//GO:0005515(protein binding)//GO:0042802(identical protein binding)//GO:0005516(calmodulin binding)
ENSG00000035720	5.75087	2.52378	1.33121e-06	2.06379e-05	up	36	9	1.81285	-0.465675	chr4	67558727	67607337	+	chr4:67558727-67607337	STAP1	protein_coding	26228	BRDG1|STAP-1	MIM:604298|HGNC:HGNC:24133|Ensembl:ENSG00000035720	4q13.2	signal transducing adaptor family member 1		GO:0010628(positive regulation of gene expression)//GO:0071222(cellular response to lipopolysaccharide)//GO:0007169(transmembrane receptor protein tyrosine kinase signaling pathway)//GO:0009617(response to bacterium)//GO:0010760(negative regulation of macrophage chemotaxis)//GO:0042326(negative regulation of phosphorylation)//GO:0060100(positive regulation of phagocytosis, engulfment)//GO:1900028…	GO:0005634(nucleus)//GO:0005737(cytoplasm)//GO:0043231(intracellular membrane-bounded organelle)//GO:0005654(nucleoplasm)//GO:0005739(mitochondrion)//GO:0032991(protein-containing complex)	GO:0035591(signaling adaptor activity)//GO:0005515(protein binding)//GO:0005068(transmembrane receptor protein tyrosine kinase adaptor activity)//GO:0005157(macrophage colony-stimulating factor receptor binding)//GO:0030674(protein-macromolecule adaptor activity)//GO:0030971(receptor tyrosine kinase binding)//GO:0019901(protein kinase binding)//GO:0005543(phospholipid binding)//GO:0001784(phospho…
ENSG00000037280	59.9748	5.90628	0.0172979	0.0626804	up	6	0	-0.498824	-2.77056	chr5	180601506	180649624	-	chr5:180601506-180649624	FLT4	protein_coding	2324	CHTD7|FLT-4|FLT41|LMPH1A|LMPHM1|PCL|VEGFR-3|VEGFR3	MIM:136352|HGNC:HGNC:3767|Ensembl:ENSG00000037280	5q35.3	fms related receptor tyrosine kinase 4	hsa04010(MAPK signaling pathway)//hsa04014(Ras signaling pathway)//hsa04015(Rap1 signaling pathway)//hsa04020(Calcium signaling pathway)//hsa04151(PI3K-Akt signaling pathway)//hsa04510(Focal adhesion)//hsa05200(Pathways in cancer)//hsa05224(Breast cancer)	GO:0006468(protein phosphorylation)//GO:0007169(transmembrane receptor protein tyrosine kinase signaling pathway)//GO:0048010(vascular endothelial growth factor receptor signaling pathway)//GO:0016310(phosphorylation)//GO:0043066(negative regulation of apoptotic process)//GO:0001525(angiogenesis)//GO:0002040(sprouting angiogenesis)//GO:0001934(positive regulation of protein phosphorylation)//GO:0…	GO:0005887(integral component of plasma membrane)//GO:0005634(nucleus)//GO:0005737(cytoplasm)//GO:0016020(membrane)//GO:0016021(integral component of membrane)//GO:0005654(nucleoplasm)//GO:0005829(cytosol)//GO:0005886(plasma membrane)//GO:0005576(extracellular region)//GO:0043235(receptor complex)	GO:0005524(ATP binding)//GO:0004672(protein kinase activity)//GO:0004714(transmembrane receptor protein tyrosine kinase activity)//GO:0004713(protein tyrosine kinase activity)//GO:0005021(vascular endothelial growth factor-activated receptor activity)//GO:0000166(nucleotide binding)//GO:0016301(kinase activity)//GO:0016740(transferase activity)//GO:0042803(protein homodimerization activity)//GO:0…
ENSG00000038382	2.36313	1.2407	1.15272e-06	1.82539e-05	up	245	151	4.5273	3.29824	chr5	14143342	14532128	+	chr5:14143342-14532128	TRIO	protein_coding	7204	ARHGEF23|MEBAS|MRD44|MRD63|tgat	MIM:601893|HGNC:HGNC:12303|Ensembl:ENSG00000038382	5p15.2	trio Rho guanine nucleotide exchange factor		GO:0006468(protein phosphorylation)//GO:0007411(axon guidance)//GO:0007417(central nervous system development)//GO:0016310(phosphorylation)//GO:0050790(regulation of catalytic activity)//GO:0048812(neuron projection morphogenesis)//GO:0051056(regulation of small GTPase mediated signal transduction)//GO:0007186(G protein-coupled receptor signaling pathway)//GO:0045599(negative regulation of fat ce…	GO:0005737(cytoplasm)//GO:0042995(cell projection)//GO:0005829(cytosol)	GO:0005524(ATP binding)//GO:0005515(protein binding)//GO:0005085(guanyl-nucleotide exchange factor activity)//GO:0004672(protein kinase activity)//GO:0005089(Rho guanyl-nucleotide exchange factor activity)//GO:0000166(nucleotide binding)//GO:0004674(protein serine/threonine kinase activity)//GO:0016301(kinase activity)//GO:0016740(transferase activity)
ENSG00000039319	2.22415	1.15325	1.02433e-07	2.14744e-06	up	1244	815	6.86405	5.71287	chr5	80408013	80483379	+	chr5:80408013-80483379	ZFYVE16	protein_coding	9765	PPP1R69	MIM:608880|HGNC:HGNC:20756|Ensembl:ENSG00000039319	5q14.1	zinc finger FYVE-type containing 16	hsa04144(Endocytosis)//hsa04350(TGF-beta signaling pathway)	GO:0007165(signal transduction)//GO:0030100(regulation of endocytosis)//GO:0016197(endosomal transport)//GO:0006622(protein targeting to lysosome)//GO:0030509(BMP signaling pathway)//GO:0016050(vesicle organization)	GO:0005737(cytoplasm)//GO:0016020(membrane)//GO:0043231(intracellular membrane-bounded organelle)//GO:0005829(cytosol)//GO:0005768(endosome)//GO:0005769(early endosome)//GO:0031901(early endosome membrane)	GO:0046872(metal ion binding)//GO:0005515(protein binding)//GO:0005547(phosphatidylinositol-3,4,5-trisphosphate binding)//GO:0005545(1-phosphatidylinositol binding)
ENSG00000039560	2.47088	1.30502	1.81843e-07	3.55431e-06	up	285	168	4.74419	3.44997	chr5	34656328	34832612	+	chr5:34656328-34832612	RAI14	protein_coding	26064	NORPEG|RAI13	MIM:606586|HGNC:HGNC:14873|Ensembl:ENSG00000039560	5p13.2	retinoic acid induced 14		GO:0030154(cell differentiation)//GO:0007283(spermatogenesis)//GO:0097190(apoptotic signaling pathway)//GO:1901222(regulation of NIK/NF-kappaB signaling)	GO:0005634(nucleus)//GO:0005737(cytoplasm)//GO:0005654(nucleoplasm)//GO:0005829(cytosol)//GO:0005856(cytoskeleton)//GO:0001650(fibrillar center)//GO:0030054(cell junction)//GO:0005938(cell cortex)	GO:0005515(protein binding)//GO:0003779(actin binding)
ENSG00000041353	2.09201	1.06489	0.0144973	0.0547307	up	36	25	1.81285	0.808137	chr18	54717860	54895516	+	chr18:54717860-54895516	RAB27B	protein_coding	5874	C25KG	MIM:603869|HGNC:HGNC:9767|Ensembl:ENSG00000041353	18q21.2	RAB27B, member RAS oncogene family	hsa04972(Pancreatic secretion)	GO:0002576(platelet degranulation)//GO:0017157(regulation of exocytosis)//GO:0032402(melanosome transport)//GO:0045921(positive regulation of exocytosis)//GO:0048488(synaptic vesicle endocytosis)//GO:0071985(multivesicular body sorting pathway)//GO:0099641(anterograde axonal protein transport)	GO:0016020(membrane)//GO:0005768(endosome)//GO:0005770(late endosome)//GO:1904115(axon cytoplasm)//GO:0042470(melanosome)//GO:0005795(Golgi stack)//GO:0005886(plasma membrane)//GO:0070062(extracellular exosome)//GO:0030141(secretory granule)//GO:0005794(Golgi apparatus)//GO:0016324(apical plasma membrane)//GO:0030140(trans-Golgi network transport vesicle)//GO:0030667(secretory granule membrane)//…	GO:0005525(GTP binding)//GO:0003924(GTPase activity)//GO:0000166(nucleotide binding)//GO:0016787(hydrolase activity)//GO:0005515(protein binding)//GO:0019904(protein domain specific binding)//GO:0019003(GDP binding)//GO:0031489(myosin V binding)
ENSG00000041982	22.1676	4.47038	1.44149e-15	1.91593e-13	up	63	4	2.59418	-1.31025	chr9	115019575	115118257	-	chr9:115019575-115118257	TNC	protein_coding	3371	150-225|DFNA56|GMEM|GP|HXB|JI|TN|TN-C	MIM:187380|HGNC:HGNC:5318|Ensembl:ENSG00000041982	9q33.1	tenascin C	hsa04151(PI3K-Akt signaling pathway)//hsa04510(Focal adhesion)//hsa04512(ECM-receptor interaction)//hsa05165(Human papillomavirus infection)//hsa05206(MicroRNAs in cancer)	GO:0007155(cell adhesion)//GO:0042127(regulation of cell population proliferation)//GO:0044267(cellular protein metabolic process)//GO:0043687(post-translational protein modification)//GO:0030198(extracellular matrix organization)//GO:0001649(osteoblast differentiation)//GO:0009611(response to wounding)//GO:0007162(negative regulation of cell adhesion)//GO:0007528(neuromuscular junction developme…	GO:0062023(collagen-containing extracellular matrix)//GO:0005615(extracellular space)//GO:0016020(membrane)//GO:0005576(extracellular region)//GO:0005925(focal adhesion)//GO:0005788(endoplasmic reticulum lumen)//GO:0005604(basement membrane)//GO:0005614(interstitial matrix)//GO:0031012(extracellular matrix)//GO:0098966(perisynaptic extracellular matrix)	GO:0005515(protein binding)//GO:0005201(extracellular matrix structural constituent)//GO:0045545(syndecan binding)
ENSG00000042493	2.68588	1.4254	1.9738e-11	1.12755e-09	up	2868	1556	8.06808	6.64392	chr2	85394753	85418432	-	chr2:85394753-85418432	CAPG	protein_coding	822	AFCP|HEL-S-66|MCP	MIM:153615|HGNC:HGNC:1474|Ensembl:ENSG00000042493	2p11.2	capping actin protein, gelsolin like		GO:0051016(barbed-end actin filament capping)//GO:0008154(actin polymerization or depolymerization)//GO:0051693(actin filament capping)//GO:0051014(actin filament severing)//GO:0007417(central nervous system development)//GO:0065003(protein-containing complex assembly)//GO:0030031(cell projection assembly)	GO:0005737(cytoplasm)//GO:0005634(nucleus)//GO:0005654(nucleoplasm)//GO:0005814(centriole)//GO:0042995(cell projection)//GO:0005730(nucleolus)//GO:0042470(melanosome)//GO:0001726(ruffle)//GO:0030027(lamellipodium)//GO:0005615(extracellular space)//GO:0070062(extracellular exosome)//GO:0015629(actin cytoskeleton)//GO:0072686(mitotic spindle)//GO:0090543(Flemming body)//GO:0008290(F-actin capping p…	GO:0051015(actin filament binding)//GO:0003779(actin binding)//GO:0005515(protein binding)//GO:0005546(phosphatidylinositol-4,5-bisphosphate binding)//GO:0045296(cadherin binding)//GO:0019904(protein domain specific binding)//GO:0044877(protein-containing complex binding)//GO:0005509(calcium ion binding)
ENSG00000042832	5.46934	2.45137	1.43468e-20	4.26914e-18	up	357	95	5.06756	2.6423	chr8	132866958	133134903	+	chr8:132866958-133134903	TG	protein_coding	7038	AITD3|TGN	MIM:188450|HGNC:HGNC:11764|Ensembl:ENSG00000042832	8q24.22	thyroglobulin	hsa04918(Thyroid hormone synthesis)//hsa05320(Autoimmune thyroid disease)	GO:0042446(hormone biosynthetic process)//GO:0006590(thyroid hormone generation)//GO:0007165(signal transduction)//GO:0030878(thyroid gland development)//GO:0015705(iodide transport)//GO:0031641(regulation of myelination)//GO:0042403(thyroid hormone metabolic process)	GO:0005576(extracellular region)//GO:0005615(extracellular space)	GO:0005515(protein binding)//GO:0042802(identical protein binding)//GO:0005179(hormone activity)
ENSG00000046604	2.72644	1.44702	1.25741e-09	4.63381e-08	up	423	226	5.31131	3.87286	chr18	31498177	31549008	+	chr18:31498177-31549008	DSG2	protein_coding	1829	CDHF5|HDGC	MIM:125671|HGNC:HGNC:3049|Ensembl:ENSG00000046604	18q12.1	desmoglein 2	hsa05412(Arrhythmogenic right ventricular cardiomyopathy)	GO:0007156(homophilic cell adhesion via plasma membrane adhesion molecules)//GO:0007155(cell adhesion)//GO:0031424(keratinization)//GO:0098609(cell-cell adhesion)//GO:0086091(regulation of heart rate by cardiac conduction)//GO:0070268(cornification)//GO:0086073(bundle of His cell-Purkinje myocyte adhesion involved in cell communication)//GO:0098911(regulation of ventricular cardiac muscle cell ac…	GO:0005886(plasma membrane)//GO:0016020(membrane)//GO:0016021(integral component of membrane)//GO:0043231(intracellular membrane-bounded organelle)//GO:0030054(cell junction)//GO:0009986(cell surface)//GO:0030057(desmosome)//GO:0070062(extracellular exosome)//GO:0005911(cell-cell junction)//GO:0001533(cornified envelope)//GO:0014704(intercalated disc)//GO:0016324(apical plasma membrane)//GO:00163…	GO:0005509(calcium ion binding)//GO:0046872(metal ion binding)//GO:0050839(cell adhesion molecule binding)//GO:0086083(cell adhesive protein binding involved in bundle of His cell-Purkinje myocyte communication)
ENSG00000047346	2.41896	1.27439	5.49865e-08	1.27287e-06	up	445	268	5.38419	4.11651	chr15	52581317	52709817	-	chr15:52581317-52709817	FAM214A	protein_coding	56204	KIAA1370	HGNC:HGNC:25609|Ensembl:ENSG00000047346	15q21.2-q21.3	family with sequence similarity 214 member A				GO:0005515(protein binding)
ENSG00000047365	2.5659	1.35946	2.08936e-05	0.0002248	up	97	55	3.20449	1.87823	chr4	35948221	36244514	-	chr4:35948221-36244514	ARAP2	protein_coding	116984	CENTD1|PARX	MIM:606645|HGNC:HGNC:16924|Ensembl:ENSG00000047365	4p14	ArfGAP with RhoGAP domain, ankyrin repeat and PH domain 2	hsa04144(Endocytosis)	GO:0007165(signal transduction)//GO:0043547(positive regulation of GTPase activity)//GO:0051056(regulation of small GTPase mediated signal transduction)	GO:0005737(cytoplasm)//GO:0005829(cytosol)	GO:0005515(protein binding)//GO:0005096(GTPase activator activity)//GO:0005547(phosphatidylinositol-3,4,5-trisphosphate binding)//GO:0046872(metal ion binding)
ENSG00000047936	2.1735	1.12002	0.0439575	0.132604	up	21	14	1.0776	0.0635202	chr6	117287353	117425942	-	chr6:117287353-117425942	ROS1	protein_coding	6098	MCF3|ROS|c-ros-1	MIM:165020|HGNC:HGNC:10261|Ensembl:ENSG00000047936	6q22.1	ROS proto-oncogene 1, receptor tyrosine kinase		GO:0006468(protein phosphorylation)//GO:0007169(transmembrane receptor protein tyrosine kinase signaling pathway)//GO:0016310(phosphorylation)//GO:0030154(cell differentiation)//GO:0007283(spermatogenesis)//GO:0001558(regulation of cell growth)//GO:0007275(multicellular organism development)//GO:0033674(positive regulation of kinase activity)//GO:0032006(regulation of TOR signaling)//GO:0070372(r…	GO:0016020(membrane)//GO:0016021(integral component of membrane)//GO:0005886(plasma membrane)//GO:0005887(integral component of plasma membrane)//GO:0043235(receptor complex)//GO:0009986(cell surface)//GO:0048471(perinuclear region of cytoplasm)	GO:0005524(ATP binding)//GO:0005515(protein binding)//GO:0004672(protein kinase activity)//GO:0004714(transmembrane receptor protein tyrosine kinase activity)//GO:0004713(protein tyrosine kinase activity)//GO:0000166(nucleotide binding)//GO:0016301(kinase activity)//GO:0016740(transferase activity)//GO:0019903(protein phosphatase binding)
ENSG00000049192	3.30479	1.72456	5.6108e-06	7.21228e-05	up	66	29	2.65971	1.00551	chr5	65148738	65481920	-	chr5:65148738-65481920	ADAMTS6	protein_coding	11174	ADAM-TS 6|ADAM-TS6|ADAMTS-6	MIM:605008|HGNC:HGNC:222|Ensembl:ENSG00000049192	5q12.3	ADAM metallopeptidase with thrombospondin type 1 motif 6		GO:0006508(proteolysis)//GO:0030198(extracellular matrix organization)//GO:0001822(kidney development)//GO:0003279(cardiac septum development)//GO:0007507(heart development)//GO:0035904(aorta development)//GO:0060976(coronary vasculature development)	GO:0005576(extracellular region)//GO:0031012(extracellular matrix)	GO:0008237(metallopeptidase activity)//GO:0004222(metalloendopeptidase activity)//GO:0046872(metal ion binding)//GO:0008233(peptidase activity)//GO:0016787(hydrolase activity)
ENSG00000049246	2.62825	1.39411	1.19935e-07	2.45749e-06	up	222	123	4.38602	3.00723	chr1	7784291	7845177	+	chr1:7784291-7845177	PER3	protein_coding	8863	FASPS3|GIG13	MIM:603427|HGNC:HGNC:8847|Ensembl:ENSG00000049246	1p36.23	period circadian regulator 3	hsa04710(Circadian rhythm)//hsa04713(Circadian entrainment)	GO:0032922(circadian regulation of gene expression)//GO:0048511(rhythmic process)//GO:0000122(negative regulation of transcription by RNA polymerase II)//GO:0050821(protein stabilization)//GO:0043153(entrainment of circadian clock by photoperiod)//GO:0045187(regulation of circadian sleep/wake cycle, sleep)	GO:0005634(nucleus)//GO:0005737(cytoplasm)	GO:0005515(protein binding)//GO:0000976(transcription regulatory region sequence-specific DNA binding)//GO:0001222(transcription corepressor binding)
ENSG00000049247	2.23725	1.16173	2.01464e-05	0.00021853	up	169	110	3.99565	2.84918	chr1	7843083	7853512	-	chr1:7843083-7853512	UTS2	protein_coding	10911	PRO1068|U-II|UCN2|UII	MIM:604097|HGNC:HGNC:12636|Ensembl:ENSG00000049247	1p36.23	urotensin 2	hsa04080(Neuroactive ligand-receptor interaction)	GO:0097746(regulation of blood vessel diameter)//GO:0008217(regulation of blood pressure)//GO:0007186(G protein-coupled receptor signaling pathway)//GO:0006936(muscle contraction)//GO:0007268(chemical synaptic transmission)	GO:0005576(extracellular region)//GO:0045202(synapse)//GO:0005615(extracellular space)	GO:0005179(hormone activity)//GO:0005102(signaling receptor binding)
ENSG00000049283	3.42556	1.77634	0.0384743	0.119685	up	12	5	0.343487	-1.09718	chr17	50532682	50543750	+	chr17:50532682-50543750	EPN3	protein_coding	55040	-	MIM:607264|HGNC:HGNC:18235|Ensembl:ENSG00000049283	17q21.33	epsin 3	hsa04144(Endocytosis)	GO:0006897(endocytosis)	GO:0005634(nucleus)//GO:0005737(cytoplasm)//GO:0043231(intracellular membrane-bounded organelle)//GO:0005654(nucleoplasm)//GO:0031410(cytoplasmic vesicle)//GO:0048471(perinuclear region of cytoplasm)//GO:0005886(plasma membrane)//GO:0030136(clathrin-coated vesicle)//GO:0070062(extracellular exosome)//GO:0005768(endosome)//GO:0030125(clathrin vesicle coat)//GO:0019897(extrinsic component of plasma…	GO:0008289(lipid binding)//GO:0005515(protein binding)//GO:0030276(clathrin binding)//GO:0005543(phospholipid binding)//GO:1990175(EH domain binding)
ENSG00000049323	5.72897	2.51828	3.35545e-05	0.000337866	up	28	7	1.46737	-0.747149	chr2	32946953	33399509	+	chr2:32946953-33399509	LTBP1	protein_coding	4052	-	MIM:150390|HGNC:HGNC:6714|Ensembl:ENSG00000049323	2p22.3	latent transforming growth factor beta binding protein 1	hsa04350(TGF-beta signaling pathway)	GO:0044267(cellular protein metabolic process)//GO:0043687(post-translational protein modification)//GO:1901388(regulation of transforming growth factor beta activation)//GO:0035583(sequestering of TGFbeta in extracellular matrix)//GO:0007178(transmembrane receptor protein serine/threonine kinase signaling pathway)	GO:0005576(extracellular region)//GO:0062023(collagen-containing extracellular matrix)//GO:0005788(endoplasmic reticulum lumen)//GO:0031012(extracellular matrix)//GO:0001527(microfibril)//GO:0032991(protein-containing complex)	GO:0005509(calcium ion binding)//GO:0005515(protein binding)//GO:0019838(growth factor binding)//GO:0005201(extracellular matrix structural constituent)//GO:0050431(transforming growth factor beta binding)//GO:0005024(transforming growth factor beta-activated receptor activity)//GO:0050436(microfibril binding)
ENSG00000050327	2.743	1.45575	0.0246357	0.0836675	up	19	10	0.943718	-0.343168	chr7	144355288	144380632	+	chr7:144355288-144380632	ARHGEF5	protein_coding	7984	GEF5|P60|TIM|TIM1	MIM:600888|HGNC:HGNC:13209|Ensembl:ENSG00000050327	7q35	Rho guanine nucleotide exchange factor 5		GO:0035556(intracellular signal transduction)//GO:0050790(regulation of catalytic activity)//GO:0090630(activation of GTPase activity)//GO:0051056(regulation of small GTPase mediated signal transduction)//GO:0032956(regulation of actin cytoskeleton organization)//GO:0007186(G protein-coupled receptor signaling pathway)//GO:0051091(positive regulation of DNA-binding transcription factor activity)/…	GO:0005634(nucleus)//GO:0005737(cytoplasm)//GO:0005654(nucleoplasm)//GO:0005829(cytosol)//GO:0005886(plasma membrane)//GO:0030054(cell junction)//GO:0042995(cell projection)//GO:0002102(podosome)//GO:0071944(cell periphery)	GO:0005515(protein binding)//GO:0005085(guanyl-nucleotide exchange factor activity)//GO:0008289(lipid binding)//GO:0005525(GTP binding)
ENSG00000050438	2.27877	1.18826	1.17785e-06	1.85928e-05	up	316	202	4.89238	3.71261	chr12	51391317	51515763	+	chr12:51391317-51515763	SLC4A8	protein_coding	9498	NBC3|NDCBE	MIM:605024|HGNC:HGNC:11034|Ensembl:ENSG00000050438	12q13.13	solute carrier family 4 member 8		GO:0006820(anion transport)//GO:0006811(ion transport)//GO:0006814(sodium ion transport)//GO:0055085(transmembrane transport)//GO:0050804(modulation of chemical synaptic transmission)//GO:0150104(transport across blood-brain barrier)//GO:0015701(bicarbonate transport)//GO:0035725(sodium ion transmembrane transport)//GO:0051453(regulation of intracellular pH)//GO:0050801(ion homeostasis)//GO:19024…	GO:0016021(integral component of membrane)//GO:0016020(membrane)//GO:0005886(plasma membrane)//GO:0043005(neuron projection)//GO:0030425(dendrite)//GO:0097386(glial cell projection)//GO:0032809(neuronal cell body membrane)//GO:0098793(presynapse)//GO:0043679(axon terminus)//GO:0032279(asymmetric synapse)//GO:0097457(hippocampal mossy fiber)//GO:0008021(synaptic vesicle)//GO:0032280(symmetric syna…	GO:0005452(inorganic anion exchanger activity)//GO:0008509(anion transmembrane transporter activity)//GO:0015297(antiporter activity)//GO:0022857(transmembrane transporter activity)//GO:0015301(anion:anion antiporter activity)//GO:0015106(bicarbonate transmembrane transporter activity)//GO:0008510(sodium:bicarbonate symporter activity)//GO:0015081(sodium ion transmembrane transporter activity)//G…
ENSG00000052126	2.03514	1.02513	0.000404642	0.0027905	up	123	88	3.54224	2.53457	chr12	19129733	19376400	+	chr12:19129733-19376400	PLEKHA5	protein_coding	54477	PEPP-2|PEPP2	MIM:607770|HGNC:HGNC:30036|Ensembl:ENSG00000052126	12p12.3	pleckstrin homology domain containing A5		GO:0008150(biological_process)//GO:0061458(reproductive system development)	GO:0005737(cytoplasm)//GO:0016020(membrane)//GO:0005654(nucleoplasm)//GO:0005829(cytosol)//GO:0014069(postsynaptic density)//GO:0098978(glutamatergic synapse)	GO:0005515(protein binding)//GO:0010314(phosphatidylinositol-5-phosphate binding)//GO:0032266(phosphatidylinositol-3-phosphate binding)//GO:0070273(phosphatidylinositol-4-phosphate binding)//GO:0080025(phosphatidylinositol-3,5-bisphosphate binding)
ENSG00000052344	5.11737	2.3554	0.000128569	0.00106096	up	25	7	1.31302	-0.747149	chr16	31131433	31135727	-	chr16:31131433-31135727	PRSS8	protein_coding	5652	CAP1|PROSTASIN	MIM:600823|HGNC:HGNC:9491|Ensembl:ENSG00000052344	16p11.2	serine protease 8		GO:0006508(proteolysis)//GO:0070268(cornification)//GO:0010765(positive regulation of sodium ion transport)	GO:0016020(membrane)//GO:0016021(integral component of membrane)//GO:0005886(plasma membrane)//GO:0005576(extracellular region)//GO:0005615(extracellular space)//GO:0070062(extracellular exosome)	GO:0004252(serine-type endopeptidase activity)//GO:0008233(peptidase activity)//GO:0016787(hydrolase activity)//GO:0008236(serine-type peptidase activity)//GO:0005515(protein binding)//GO:0017080(sodium channel regulator activity)
ENSG00000053524	3.01509	1.5922	1.59361e-09	5.74536e-08	up	234	113	4.46145	2.88722	chr3	183178041	183428778	-	chr3:183178041-183428778	MCF2L2	protein_coding	23101	ARHGEF22	HGNC:HGNC:30319|Ensembl:ENSG00000053524	3q27.1	MCF.2 cell line derived transforming sequence-like 2		GO:0050790(regulation of catalytic activity)		GO:0005085(guanyl-nucleotide exchange factor activity)
ENSG00000054282	2.13599	1.0949	3.30763e-07	5.95703e-06	up	1545	1054	7.17631	6.08296	chr1	243256034	243500091	+	chr1:243256034-243500091	SDCCAG8	protein_coding	10806	BBS16|CCCAP|CCCAP SLSN7|HSPC085|NPHP10|NY-CO-8|SLSN7|hCCCAP	MIM:613524|HGNC:HGNC:10671|Ensembl:ENSG00000054282	1q43-q44	SHH signaling and ciliogenesis regulator SDCCAG8		GO:0007098(centrosome cycle)//GO:0030030(cell projection organization)//GO:1902017(regulation of cilium assembly)//GO:0000086(G2/M transition of mitotic cell cycle)//GO:0010389(regulation of G2/M transition of mitotic cell cycle)//GO:0097711(ciliary basal body-plasma membrane docking)//GO:0001764(neuron migration)//GO:0035148(tube formation)//GO:0030010(establishment of cell polarity)//GO:0031023…	GO:0005813(centrosome)//GO:0005737(cytoplasm)//GO:0005856(cytoskeleton)//GO:0005814(centriole)//GO:0030054(cell junction)//GO:0042995(cell projection)//GO:0005815(microtubule organizing center)//GO:0005829(cytosol)//GO:0005911(cell-cell junction)//GO:0034451(centriolar satellite)//GO:0036064(ciliary basal body)//GO:0097733(photoreceptor cell cilium)	GO:0005515(protein binding)
ENSG00000055163	3.26247	1.70596	7.90663e-10	3.00256e-08	up	195	87	4.20034	2.5185	chr5	157266079	157395595	+	chr5:157266079-157395595	CYFIP2	protein_coding	26999	DEE65|EIEE65|PIR121	MIM:606323|HGNC:HGNC:13760|Ensembl:ENSG00000055163	5q33.3	cytoplasmic FMR1 interacting protein 2	hsa03013(RNA transport)//hsa04810(Regulation of actin cytoskeleton)//hsa05130(Pathogenic Escherichia coli infection)//hsa05132(Salmonella infection)	GO:0030833(regulation of actin filament polymerization)//GO:0006915(apoptotic process)//GO:0007155(cell adhesion)//GO:0038096(Fc-gamma receptor signaling pathway involved in phagocytosis)//GO:0048010(vascular endothelial growth factor receptor signaling pathway)//GO:0098609(cell-cell adhesion)//GO:0000902(cell morphogenesis)//GO:0045862(positive regulation of proteolysis)//GO:0097202(activation o…	GO:0005634(nucleus)//GO:0005737(cytoplasm)//GO:0016020(membrane)//GO:0030054(cell junction)//GO:0045202(synapse)//GO:0043005(neuron projection)//GO:0048471(perinuclear region of cytoplasm)//GO:0005829(cytosol)//GO:0070062(extracellular exosome)	GO:0048365(Rac GTPase binding)//GO:0005515(protein binding)
ENSG00000055332	2.28731	1.19365	1.27587e-08	3.56761e-07	up	4340	2765	8.66546	7.47243	chr2	37099210	37157522	-	chr2:37099210-37157522	EIF2AK2	protein_coding	5610	EIF2AK1|LEUDEN|PKR|PPP1R83|PRKR	MIM:176871|HGNC:HGNC:9437|Ensembl:ENSG00000055332	2p22.2	eukaryotic translation initiation factor 2 alpha kinase 2	hsa04141(Protein processing in endoplasmic reticulum)//hsa04217(Necroptosis)//hsa05010(Alzheimer disease)//hsa05160(Hepatitis C)//hsa05162(Measles)//hsa05164(Influenza A)//hsa05165(Human papillomavirus infection)//hsa05167(Kaposi sarcoma-associated herpesvirus infection)//hsa05168(Herpes simplex virus 1 infection)//hsa05169(Epstein-Barr virus infection)//hsa05171(Coronavirus disease - COVID-19)//…	GO:0006468(protein phosphorylation)//GO:0016310(phosphorylation)//GO:0018108(peptidyl-tyrosine phosphorylation)//GO:0017148(negative regulation of translation)//GO:0010998(regulation of translational initiation by eIF2 alpha phosphorylation)//GO:0016032(viral process)//GO:0051607(defense response to virus)//GO:0002376(immune system process)//GO:0045087(innate immune response)//GO:0043666(regulati…	GO:0005634(nucleus)//GO:0005737(cytoplasm)//GO:0016020(membrane)//GO:0005829(cytosol)//GO:0048471(perinuclear region of cytoplasm)//GO:0005840(ribosome)//GO:0022626(cytosolic ribosome)	GO:0005524(ATP binding)//GO:0004672(protein kinase activity)//GO:0003723(RNA binding)//GO:0000166(nucleotide binding)//GO:0004674(protein serine/threonine kinase activity)//GO:0016301(kinase activity)//GO:0016740(transferase activity)//GO:0004713(protein tyrosine kinase activity)//GO:0005515(protein binding)//GO:0004715(non-membrane spanning protein tyrosine kinase activity)//GO:0042802(identical…
ENSG00000055732	2.3067	1.20583	7.07911e-08	1.58047e-06	up	752	475	6.13905	4.93688	chr1	85018082	85048500	-	chr1:85018082-85048500	MCOLN3	protein_coding	55283	TRP-ML3|TRPML3	MIM:607400|HGNC:HGNC:13358|Ensembl:ENSG00000055732	1p22.3	mucolipin TRP cation channel 3	hsa04020(Calcium signaling pathway)	GO:0006811(ion transport)//GO:0051209(release of sequestered calcium ion into cytosol)//GO:0070588(calcium ion transmembrane transport)//GO:0007626(locomotory behavior)//GO:0042491(inner ear auditory receptor cell differentiation)//GO:0034220(ion transmembrane transport)//GO:0098655(cation transmembrane transport)	GO:0016020(membrane)//GO:0016021(integral component of membrane)//GO:0005886(plasma membrane)//GO:0005768(endosome)//GO:0005765(lysosomal membrane)//GO:0031410(cytoplasmic vesicle)//GO:0005764(lysosome)//GO:0000421(autophagosome membrane)//GO:0031902(late endosome membrane)//GO:0031901(early endosome membrane)//GO:0005737(cytoplasm)	GO:0005261(cation channel activity)//GO:0008289(lipid binding)//GO:0072345(NAADP-sensitive calcium-release channel activity)
ENSG00000056558	3.3176	1.73014	1.39139e-08	3.84214e-07	up	130	57	3.62111	1.92774	chr9	120902393	120929173	-	chr9:120902393-120929173	TRAF1	protein_coding	7185	EBI6|MGC:10353	MIM:601711|HGNC:HGNC:12031|Ensembl:ENSG00000056558	9q33.2	TNF receptor associated factor 1	hsa04064(NF-kappa B signaling pathway)//hsa04210(Apoptosis)//hsa04668(TNF signaling pathway)//hsa05200(Pathways in cancer)//hsa05202(Transcriptional misregulation in cancer)//hsa05203(Viral carcinogenesis)//hsa05222(Small cell lung cancer)	GO:0042981(regulation of apoptotic process)//GO:0006915(apoptotic process)//GO:0007165(signal transduction)//GO:0043122(regulation of I-kappaB kinase/NF-kappaB signaling)//GO:0051092(positive regulation of NF-kappaB transcription factor activity)//GO:0070534(protein K63-linked ubiquitination)//GO:0065003(protein-containing complex assembly)//GO:0033209(tumor necrosis factor-mediated signaling pat…	GO:0005829(cytosol)//GO:0005737(cytoplasm)//GO:0009898(cytoplasmic side of plasma membrane)	GO:0005515(protein binding)//GO:0005164(tumor necrosis factor receptor binding)//GO:0008270(zinc ion binding)//GO:0042802(identical protein binding)//GO:0031625(ubiquitin protein ligase binding)//GO:0031996(thioesterase binding)
ENSG00000057468	2.5994	1.37818	0.0348449	0.110253	up	18	10	0.871809	-0.343168	chr1	75796882	75913242	+	chr1:75796882-75913242	MSH4	protein_coding	4438	-	MIM:602105|HGNC:HGNC:7327|Ensembl:ENSG00000057468	1p31.1	mutS homolog 4		GO:0006298(mismatch repair)//GO:0051321(meiotic cell cycle)//GO:0000712(resolution of meiotic recombination intermediates)//GO:0007131(reciprocal meiotic recombination)//GO:0000710(meiotic mismatch repair)//GO:0001541(ovarian follicle development)//GO:0007129(homologous chromosome pairing at meiosis)//GO:0007283(spermatogenesis)//GO:0007292(female gamete generation)	GO:0005694(chromosome)//GO:0000795(synaptonemal complex)//GO:0005634(nucleus)//GO:0000793(condensed chromosome)//GO:0000794(condensed nuclear chromosome)//GO:0005713(recombination nodule)	GO:0005524(ATP binding)//GO:0030983(mismatched DNA binding)//GO:0000166(nucleotide binding)//GO:0003677(DNA binding)//GO:0005515(protein binding)//GO:0008094(DNA-dependent ATPase activity)
ENSG00000057704	10.9272	3.44985	6.06227e-10	2.39808e-08	up	46	6	2.15335	-0.911577	chr12	94567122	94650557	-	chr12:94567122-94650557	TMCC3	protein_coding	57458	-	MIM:617459|HGNC:HGNC:29199|Ensembl:ENSG00000057704	12q22	transmembrane and coiled-coil domain family 3			GO:0016020(membrane)//GO:0016021(integral component of membrane)//GO:0005783(endoplasmic reticulum)//GO:0005789(endoplasmic reticulum membrane)//GO:0012505(endomembrane system)	GO:0005515(protein binding)//GO:0042802(identical protein binding)//GO:0071889(14-3-3 protein binding)
ENSG00000058085	6.52748	2.70653	0.00200946	0.0107986	up	14	3	0.541877	-1.56032	chr1	183186238	183245127	+	chr1:183186238-183245127	LAMC2	protein_coding	3918	B2T|BM600|CSF|EBR2|EBR2A|LAMB2T|LAMNB2	MIM:150292|HGNC:HGNC:6493|Ensembl:ENSG00000058085	1q25.3	laminin subunit gamma 2	hsa04151(PI3K-Akt signaling pathway)//hsa04510(Focal adhesion)//hsa04512(ECM-receptor interaction)//hsa05145(Toxoplasmosis)//hsa05146(Amoebiasis)//hsa05165(Human papillomavirus infection)//hsa05200(Pathways in cancer)//hsa05222(Small cell lung cancer)	GO:0008284(positive regulation of cell population proliferation)//GO:0030335(positive regulation of cell migration)//GO:0007155(cell adhesion)//GO:0009887(animal organ morphogenesis)//GO:0009888(tissue development)//GO:0016358(dendrite development)//GO:0030198(extracellular matrix organization)//GO:0008045(motor neuron axon guidance)//GO:0008544(epidermis development)//GO:0031581(hemidesmosome as…	GO:0005576(extracellular region)//GO:0005604(basement membrane)//GO:0062023(collagen-containing extracellular matrix)//GO:0005607(laminin-2 complex)//GO:0005615(extracellular space)//GO:0005938(cell cortex)//GO:0016020(membrane)//GO:0031012(extracellular matrix)//GO:0048471(perinuclear region of cytoplasm)	GO:0008201(heparin binding)//GO:0005102(signaling receptor binding)//GO:0005201(extracellular matrix structural constituent)
ENSG00000059377	2.58104	1.36795	4.81034e-08	1.13094e-06	up	280	158	4.71879	3.36266	chr7	139777051	140020325	+	chr7:139777051-140020325	TBXAS1	protein_coding	6916	BDPLT14|CYP5|CYP5A1|GHOSAL|THAS|TS|TXAS|TXS	MIM:274180|HGNC:HGNC:11609|Ensembl:ENSG00000059377	7q34	thromboxane A synthase 1	hsa00590(Arachidonic acid metabolism)//hsa01100(Metabolic pathways)//hsa04611(Platelet activation)	GO:0055114(oxidation-reduction process)//GO:0006629(lipid metabolic process)//GO:0006631(fatty acid metabolic process)//GO:0006633(fatty acid biosynthetic process)//GO:0001516(prostaglandin biosynthetic process)//GO:0006693(prostaglandin metabolic process)//GO:0019371(cyclooxygenase pathway)//GO:0006690(icosanoid metabolic process)//GO:0030644(cellular chloride ion homeostasis)//GO:0045471(respon…	GO:0016020(membrane)//GO:0016021(integral component of membrane)//GO:0005783(endoplasmic reticulum)//GO:0005789(endoplasmic reticulum membrane)	GO:0020037(heme binding)//GO:0005506(iron ion binding)//GO:0016705(oxidoreductase activity, acting on paired donors, with incorporation or reduction of molecular oxygen)//GO:0046872(metal ion binding)//GO:0016853(isomerase activity)//GO:0004497(monooxygenase activity)//GO:0016491(oxidoreductase activity)//GO:0016829(lyase activity)//GO:0106256(hydroperoxy icosatetraenoate dehydratase activity)//G…
ENSG00000059378	2.09192	1.06483	1.32962e-05	0.000153317	up	303	211	4.83208	3.77481	chr7	140023749	140062951	-	chr7:140023749-140062951	PARP12	protein_coding	64761	ARTD12|MST109|MSTP109|ZC3H1|ZC3HDC1	MIM:612481|HGNC:HGNC:21919|Ensembl:ENSG00000059378	7q34	poly(ADP-ribose) polymerase family member 12		GO:0070213(protein auto-ADP-ribosylation)//GO:0140289(protein mono-ADP-ribosylation)	GO:0005634(nucleus)	GO:0046872(metal ion binding)//GO:0003950(NAD+ ADP-ribosyltransferase activity)//GO:0003723(RNA binding)//GO:0016740(transferase activity)//GO:1990404(protein ADP-ribosylase activity)//GO:0016757(transferase activity, transferring glycosyl groups)
ENSG00000059804	5.36455	2.42346	7.02098e-22	2.4996e-19	up	479	130	5.49005	3.08567	chr12	7919230	7936187	-	chr12:7919230-7936187	SLC2A3	protein_coding	6515	GLUT3	MIM:138170|HGNC:HGNC:11007|Ensembl:ENSG00000059804	12p13.31	solute carrier family 2 member 3		GO:0055085(transmembrane transport)//GO:1904659(glucose transmembrane transport)//GO:0008643(carbohydrate transport)//GO:0043312(neutrophil degranulation)//GO:0005975(carbohydrate metabolic process)//GO:0150104(transport across blood-brain barrier)//GO:0098708(glucose import across plasma membrane)//GO:0019852(L-ascorbic acid metabolic process)	GO:0016021(integral component of membrane)//GO:0016020(membrane)//GO:0005886(plasma membrane)//GO:0042995(cell projection)//GO:0043204(perikaryon)//GO:0005887(integral component of plasma membrane)//GO:0070062(extracellular exosome)//GO:0035579(specific granule membrane)//GO:0070821(tertiary granule membrane)//GO:0030667(secretory granule membrane)//GO:0101003(ficolin-1-rich granule membrane)	GO:0022857(transmembrane transporter activity)//GO:0005355(glucose transmembrane transporter activity)//GO:0005515(protein binding)//GO:0005536(glucose binding)
ENSG00000060656	2.44964	1.29257	0.0195301	0.0693327	up	22	13	1.14015	-0.0279156	chr1	29236516	29326813	+	chr1:29236516-29326813	PTPRU	protein_coding	10076	FMI|PCP-2|PTP|PTP-J|PTP-PI|PTP-RO|PTPPSI|PTPRO|PTPU2|R-PTP-PSI|R-PTP-U|hPTP-J	MIM:602454|HGNC:HGNC:9683|Ensembl:ENSG00000060656	1p35.3	protein tyrosine phosphatase receptor type U		GO:0006470(protein dephosphorylation)//GO:0016311(dephosphorylation)//GO:0007155(cell adhesion)//GO:0030154(cell differentiation)//GO:0035335(peptidyl-tyrosine dephosphorylation)//GO:0008285(negative regulation of cell population proliferation)//GO:0090090(negative regulation of canonical Wnt signaling pathway)//GO:0034394(protein localization to cell surface)//GO:0030336(negative regulation of c…	GO:0016020(membrane)//GO:0016021(integral component of membrane)//GO:0005886(plasma membrane)//GO:0030054(cell junction)//GO:0005887(integral component of plasma membrane)//GO:0005911(cell-cell junction)	GO:0005515(protein binding)//GO:0016791(phosphatase activity)//GO:0004725(protein tyrosine phosphatase activity)//GO:0016787(hydrolase activity)//GO:0004721(phosphoprotein phosphatase activity)//GO:0008013(beta-catenin binding)//GO:0005001(transmembrane receptor protein tyrosine phosphatase activity)
ENSG00000060709	50.1457	5.64805	0.0336166	0.10732	up	5	0	-0.703312	-2.77056	chr12	130396137	130716281	-	chr12:130396137-130716281	RIMBP2	protein_coding	23504	PPP1R133|RBP2|RIM-BP2	MIM:611602|HGNC:HGNC:30339|Ensembl:ENSG00000060709	12q24.33	RIMS binding protein 2		GO:0010923(negative regulation of phosphatase activity)//GO:0007274(neuromuscular synaptic transmission)	GO:0016020(membrane)//GO:0005886(plasma membrane)//GO:0030054(cell junction)//GO:0045202(synapse)	GO:0005515(protein binding)
ENSG00000060718	109.12	6.76978	0.000352487	0.00248323	up	11	0	0.233025	-2.77056	chr1	102876467	103108872	-	chr1:102876467-103108872	COL11A1	protein_coding	1301	CO11A1|COLL6|DFNA37|STL2	MIM:120280|HGNC:HGNC:2186|Ensembl:ENSG00000060718	1p21.1	collagen type XI alpha 1 chain	hsa04974(Protein digestion and absorption)	GO:0007605(sensory perception of sound)//GO:0007601(visual perception)//GO:0030198(extracellular matrix organization)//GO:0030199(collagen fibril organization)//GO:0035987(endodermal cell differentiation)//GO:0050910(detection of mechanical stimulus involved in sensory perception of sound)//GO:0001502(cartilage condensation)//GO:0001503(ossification)//GO:0002063(chondrocyte development)//GO:00030…	GO:0005576(extracellular region)//GO:0005581(collagen trimer)//GO:0005615(extracellular space)//GO:0031012(extracellular matrix)//GO:0062023(collagen-containing extracellular matrix)//GO:0005788(endoplasmic reticulum lumen)//GO:0005592(collagen type XI trimer)	GO:0005201(extracellular matrix structural constituent)//GO:0046872(metal ion binding)//GO:0050840(extracellular matrix binding)//GO:0030020(extracellular matrix structural constituent conferring tensile strength)//GO:0030674(protein-macromolecule adaptor activity)//GO:0008201(heparin binding)//GO:1904399(heparan sulfate binding)
ENSG00000061676	2.87684	1.52448	6.08849e-06	7.78616e-05	up	91	46	3.11389	1.63164	chr2	182909115	183038858	-	chr2:182909115-183038858	NCKAP1	protein_coding	10787	HEM2|NAP1|NAP125|p125Nap1	MIM:604891|HGNC:HGNC:7666|Ensembl:ENSG00000061676	2q32.1	NCK associated protein 1	hsa04810(Regulation of actin cytoskeleton)//hsa05130(Pathogenic Escherichia coli infection)//hsa05132(Salmonella infection)	GO:0016032(viral process)//GO:0038096(Fc-gamma receptor signaling pathway involved in phagocytosis)//GO:0016477(cell migration)//GO:0030866(cortical actin cytoskeleton organization)//GO:0048812(neuron projection morphogenesis)//GO:0030838(positive regulation of actin filament polymerization)//GO:0007417(central nervous system development)//GO:0048010(vascular endothelial growth factor receptor si…	GO:0016020(membrane)//GO:0016021(integral component of membrane)//GO:0005886(plasma membrane)//GO:0005925(focal adhesion)//GO:0042995(cell projection)//GO:0031258(lamellipodium membrane)//GO:0005829(cytosol)//GO:0070062(extracellular exosome)//GO:0030027(lamellipodium)//GO:0001726(ruffle)//GO:0031209(SCAR complex)//GO:0031941(filamentous actin)	GO:0005515(protein binding)//GO:0031267(small GTPase binding)
ENSG00000061918	2.47426	1.307	1.28964e-05	0.000149257	up	119	70	3.49515	2.21377	chr4	155758992	155807811	+	chr4:155758992-155807811	GUCY1B1	protein_coding	2983	GC-S-beta-1|GC-SB3|GUC1B3|GUCB3|GUCSB3|GUCY1B3	MIM:139397|HGNC:HGNC:4687|Ensembl:ENSG00000061918	4q32.1	guanylate cyclase 1 soluble subunit beta 1	hsa00230(Purine metabolism)//hsa01100(Metabolic pathways)//hsa04022(cGMP-PKG signaling pathway)//hsa04270(Vascular smooth muscle contraction)//hsa04540(Gap junction)//hsa04611(Platelet activation)//hsa04713(Circadian entrainment)//hsa04730(Long-term depression)//hsa04921(Oxytocin signaling pathway)//hsa04924(Renin secretion)//hsa04970(Salivary secretion)	GO:0035556(intracellular signal transduction)//GO:0009190(cyclic nucleotide biosynthetic process)//GO:0006182(cGMP biosynthetic process)//GO:0019934(cGMP-mediated signaling)//GO:0099555(trans-synaptic signaling by nitric oxide, modulating synaptic transmission)//GO:0007263(nitric oxide mediated signal transduction)//GO:0008015(blood circulation)//GO:0071732(cellular response to nitric oxide)//GO:…	GO:0005737(cytoplasm)//GO:0008074(guanylate cyclase complex, soluble)//GO:0032991(protein-containing complex)//GO:0048786(presynaptic active zone)//GO:0098831(presynaptic active zone cytoplasmic component)//GO:0098978(glutamatergic synapse)	GO:0020037(heme binding)//GO:0004383(guanylate cyclase activity)//GO:0016849(phosphorus-oxygen lyase activity)//GO:0000166(nucleotide binding)//GO:0016829(lyase activity)//GO:0005525(GTP binding)//GO:0004016(adenylate cyclase activity)//GO:0043167(ion binding)//GO:0044877(protein-containing complex binding)//GO:0047805(cytidylate cyclase activity)//GO:0051879(Hsp90 protein binding)//GO:0046872(me…
ENSG00000063127	3.69131	1.88413	3.94303e-06	5.33325e-05	up	56	22	2.42863	0.640085	chr19	49289638	49325215	-	chr19:49289638-49325215	SLC6A16	protein_coding	28968	NT5|NTT5	MIM:607972|HGNC:HGNC:13622|Ensembl:ENSG00000063127	19q13.33	solute carrier family 6 member 16		GO:0006836(neurotransmitter transport)//GO:0035725(sodium ion transmembrane transport)//GO:0055085(transmembrane transport)	GO:0016021(integral component of membrane)//GO:0016020(membrane)//GO:0005886(plasma membrane)	GO:0015293(symporter activity)//GO:0005326(neurotransmitter transmembrane transporter activity)
ENSG00000063180	8.37922	3.06682	4.09254e-08	9.84234e-07	up	41	7	1.99312	-0.747149	chr19	48637946	48646187	-	chr19:48637946-48646187	CA11	protein_coding	770	CA-RP|CA-RP II|CA-XI|CARP-2|CARPX1	MIM:604644|HGNC:HGNC:1370|Ensembl:ENSG00000063180	19q13.33	carbonic anhydrase 11		GO:0006730(one-carbon metabolic process)	GO:0005576(extracellular region)//GO:0016323(basolateral plasma membrane)	GO:0008270(zinc ion binding)//GO:0004089(carbonate dehydratase activity)//GO:0016836(hydro-lyase activity)
ENSG00000063601	2.14334	1.09986	2.14811e-06	3.1398e-05	up	459	312	5.42873	4.3341	chrX	150692971	150765108	+	chrX:150692971-150765108	MTMR1	protein_coding	8776	-	MIM:300171|HGNC:HGNC:7449|Ensembl:ENSG00000063601	Xq28	myotubularin related protein 1	hsa00562(Inositol phosphate metabolism)//hsa01100(Metabolic pathways)//hsa04070(Phosphatidylinositol signaling system)	GO:0046856(phosphatidylinositol dephosphorylation)//GO:0006629(lipid metabolic process)//GO:0016311(dephosphorylation)//GO:0035335(peptidyl-tyrosine dephosphorylation)//GO:0006661(phosphatidylinositol biosynthetic process)//GO:0060304(regulation of phosphatidylinositol dephosphorylation)	GO:0005737(cytoplasm)//GO:0016020(membrane)//GO:0005886(plasma membrane)//GO:0005829(cytosol)	GO:0004438(phosphatidylinositol-3-phosphatase activity)//GO:0052629(phosphatidylinositol-3,5-bisphosphate 3-phosphatase activity)//GO:0052866(phosphatidylinositol phosphate phosphatase activity)//GO:0016787(hydrolase activity)//GO:0042803(protein homodimerization activity)//GO:0004725(protein tyrosine phosphatase activity)//GO:0016791(phosphatase activity)
ENSG00000064042	59.9748	5.90628	0.0172979	0.0626804	up	6	0	-0.498824	-2.77056	chr4	41359607	41700044	+	chr4:41359607-41700044	LIMCH1	protein_coding	22998	LIMCH1A|LMO7B	MIM:617750|HGNC:HGNC:29191|Ensembl:ENSG00000064042	4p13	LIM and calponin homology domains 1		GO:0031032(actomyosin structure organization)//GO:0001934(positive regulation of protein phosphorylation)//GO:0051496(positive regulation of stress fiber assembly)//GO:0030336(negative regulation of cell migration)//GO:0051893(regulation of focal adhesion assembly)//GO:0060327(cytoplasmic actin-based contraction involved in cell motility)	GO:0005737(cytoplasm)//GO:0005856(cytoskeleton)//GO:0001725(stress fiber)//GO:0016460(myosin II complex)	GO:0046872(metal ion binding)//GO:0003779(actin binding)//GO:0005515(protein binding)//GO:0032034(myosin II head/neck binding)
ENSG00000064205	2.37999	1.25096	0.000306909	0.00222827	up	72	44	2.78245	1.57061	chr20	44714844	44728509	+	chr20:44714844-44728509	CCN5	protein_coding	8839	CT58|CTGF-L|WISP2	MIM:603399|HGNC:HGNC:12770|Ensembl:ENSG00000064205	20q13.12	cellular communication network factor 5		GO:0007165(signal transduction)//GO:0007155(cell adhesion)//GO:0007267(cell-cell signaling)//GO:0060548(negative regulation of cell death)	GO:0005576(extracellular region)//GO:0005634(nucleus)//GO:0005615(extracellular space)//GO:0031012(extracellular matrix)	GO:0005515(protein binding)//GO:0005520(insulin-like growth factor binding)//GO:0005178(integrin binding)//GO:0008201(heparin binding)
ENSG00000064218	2.89583	1.53398	0.00318237	0.0157008	up	30	15	1.5618	0.149505	chr9	976655	991732	+	chr9:976655-991732	DMRT3	protein_coding	58524	DMRTA3	MIM:614754|HGNC:HGNC:13909|Ensembl:ENSG00000064218	9p24.3	doublesex and mab-3 related transcription factor 3		GO:0006355(regulation of transcription, DNA-templated)//GO:0007275(multicellular organism development)//GO:0030154(cell differentiation)//GO:0006357(regulation of transcription by RNA polymerase II)//GO:0007548(sex differentiation)//GO:0007628(adult walking behavior)//GO:0019226(transmission of nerve impulse)//GO:0021521(ventral spinal cord interneuron specification)//GO:0042487(regulation of odo…	GO:0005634(nucleus)//GO:0000785(chromatin)	GO:0005515(protein binding)//GO:0003700(DNA-binding transcription factor activity)//GO:0043565(sequence-specific DNA binding)//GO:0046872(metal ion binding)//GO:0003677(DNA binding)//GO:0000981(DNA-binding transcription factor activity, RNA polymerase II-specific)//GO:0000978(RNA polymerase II cis-regulatory region sequence-specific DNA binding)//GO:1990837(sequence-specific double-stranded DNA b…
ENSG00000064652	2.559	1.35558	1.41134e-07	2.83648e-06	up	246	140	4.53314	3.1908	chr5	122843439	123029354	+	chr5:122843439-123029354	SNX24	protein_coding	28966	PRO1284|SBBI31	HGNC:HGNC:21533|Ensembl:ENSG00000064652	5q23.2	sorting nexin 24		GO:0015031(protein transport)	GO:0016020(membrane)//GO:0031410(cytoplasmic vesicle)//GO:0030659(cytoplasmic vesicle membrane)	GO:0035091(phosphatidylinositol binding)//GO:0005515(protein binding)//GO:0008289(lipid binding)//GO:1901981(phosphatidylinositol phosphate binding)//GO:0010314(phosphatidylinositol-5-phosphate binding)//GO:0032266(phosphatidylinositol-3-phosphate binding)//GO:0070273(phosphatidylinositol-4-phosphate binding)
ENSG00000064687	2.96472	1.5679	3.26376e-12	2.29118e-10	up	875	430	6.35718	4.79401	chr19	1039997	1065572	+	chr19:1039997-1065572	ABCA7	protein_coding	10347	ABCA-SSN|ABCX|AD9	MIM:605414|HGNC:HGNC:37|Ensembl:ENSG00000064687	19p13.3	ATP binding cassette subfamily A member 7	hsa02010(ABC transporters)	GO:0055085(transmembrane transport)//GO:1902430(negative regulation of amyloid-beta formation)//GO:0043409(negative regulation of MAPK cascade)//GO:0006909(phagocytosis)//GO:2000010(positive regulation of protein localization to cell surface)//GO:0033344(cholesterol efflux)//GO:0006869(lipid transport)//GO:0033700(phospholipid efflux)//GO:0045332(phospholipid translocation)//GO:0010875(positive r…	GO:0016021(integral component of membrane)//GO:0005886(plasma membrane)//GO:0005737(cytoplasm)//GO:0016020(membrane)//GO:0005794(Golgi apparatus)//GO:0005783(endoplasmic reticulum)//GO:0005768(endosome)//GO:0000139(Golgi membrane)//GO:0042995(cell projection)//GO:0030054(cell junction)//GO:0031901(early endosome membrane)//GO:0043231(intracellular membrane-bounded organelle)//GO:0032587(ruffle me…	GO:0005524(ATP binding)//GO:0042626(ATPase-coupled transmembrane transporter activity)//GO:0016887(ATPase activity)//GO:0000166(nucleotide binding)//GO:0140326(ATPase-coupled intramembrane lipid transporter activity)//GO:0005319(lipid transporter activity)//GO:0005548(phospholipid transporter activity)//GO:0090554(phosphatidylcholine floppase activity)//GO:0090556(phosphatidylserine floppase acti…
ENSG00000064886	2.17624	1.12183	0.0222191	0.0771073	up	27	18	1.41774	0.380416	chr1	111200771	111243440	+	chr1:111200771-111243440	CHI3L2	protein_coding	1117	CHIL2|YKL-39|YKL39	MIM:601526|HGNC:HGNC:1933|Ensembl:ENSG00000064886	1p13.2	chitinase 3 like 2		GO:0005975(carbohydrate metabolic process)//GO:0006032(chitin catabolic process)	GO:0005615(extracellular space)//GO:0005576(extracellular region)	GO:0008061(chitin binding)//GO:0030246(carbohydrate binding)//GO:0016787(hydrolase activity)
ENSG00000064989	6.1742	2.62625	0.0139512	0.0530509	up	9	2	-0.0170497	-1.86302	chr2	187341964	187448460	-	chr2:187341964-187448460	CALCRL	protein_coding	10203	CGRPR|CRLR|LMPHM8	MIM:114190|HGNC:HGNC:16709|Ensembl:ENSG00000064989	2q32.1	calcitonin receptor like receptor	hsa04080(Neuroactive ligand-receptor interaction)//hsa04270(Vascular smooth muscle contraction)	GO:0007186(G protein-coupled receptor signaling pathway)//GO:0007166(cell surface receptor signaling pathway)//GO:0015031(protein transport)//GO:0007165(signal transduction)//GO:0006816(calcium ion transport)//GO:0001525(angiogenesis)//GO:0007188(adenylate cyclase-modulating G protein-coupled receptor signaling pathway)//GO:0007189(adenylate cyclase-activating G protein-coupled receptor signaling…	GO:0016021(integral component of membrane)//GO:0016020(membrane)//GO:0005737(cytoplasm)//GO:0005783(endoplasmic reticulum)//GO:0005886(plasma membrane)//GO:0005768(endosome)//GO:0005764(lysosome)//GO:0005887(integral component of plasma membrane)//GO:1990406(CGRP receptor complex)//GO:1903143(adrenomedullin receptor complex)	GO:0004930(G protein-coupled receptor activity)//GO:0004948(calcitonin receptor activity)//GO:0004888(transmembrane signaling receptor activity)//GO:0005515(protein binding)//GO:0008528(G protein-coupled peptide receptor activity)//GO:0001635(calcitonin gene-related peptide receptor activity)//GO:0001605(adrenomedullin receptor activity)//GO:1990409(adrenomedullin binding)
ENSG00000065320	2.53117	1.3398	0.00062469	0.00404102	up	54	31	2.37762	1.09492	chr17	9021510	9244000	+	chr17:9021510-9244000	NTN1	protein_coding	9423	MRMV4|NTN1L	MIM:601614|HGNC:HGNC:8029|Ensembl:ENSG00000065320	17p13.1	netrin 1	hsa04360(Axon guidance)	GO:0006915(apoptotic process)//GO:0006930(substrate-dependent cell migration, cell extension)//GO:0007265(Ras protein signal transduction)//GO:0032488(Cdc42 protein signal transduction)//GO:0045773(positive regulation of axon extension)//GO:0009887(animal organ morphogenesis)//GO:0009888(tissue development)//GO:0016358(dendrite development)//GO:0008045(motor neuron axon guidance)//GO:1902842(nega…	GO:0005737(cytoplasm)//GO:0005576(extracellular region)//GO:0005604(basement membrane)	GO:0005515(protein binding)
ENSG00000065357	2.65712	1.40986	1.75575e-09	6.19844e-08	up	487	267	5.51387	4.11116	chr12	55927319	55954027	+	chr12:55927319-55954027	DGKA	protein_coding	1606	DAGK|DAGK1|DGK-alpha	MIM:125855|HGNC:HGNC:2849|Ensembl:ENSG00000065357	12q13.2	diacylglycerol kinase alpha	hsa00561(Glycerolipid metabolism)//hsa00564(Glycerophospholipid metabolism)//hsa01100(Metabolic pathways)//hsa04070(Phosphatidylinositol signaling system)//hsa04072(Phospholipase D signaling pathway)//hsa05231(Choline metabolism in cancer)	GO:0007165(signal transduction)//GO:0035556(intracellular signal transduction)//GO:0007205(protein kinase C-activating G protein-coupled receptor signaling pathway)//GO:0016310(phosphorylation)//GO:0046486(glycerolipid metabolic process)//GO:0006629(lipid metabolic process)//GO:0030168(platelet activation)//GO:0006654(phosphatidic acid biosynthetic process)//GO:0046339(diacylglycerol metabolic pr…	GO:0005737(cytoplasm)//GO:0016020(membrane)//GO:0005829(cytosol)//GO:0005886(plasma membrane)	GO:0005509(calcium ion binding)//GO:0004143(diacylglycerol kinase activity)//GO:0016301(kinase activity)//GO:0003951(NAD+ kinase activity)//GO:0046872(metal ion binding)//GO:0000166(nucleotide binding)//GO:0005524(ATP binding)//GO:0016740(transferase activity)//GO:0008289(lipid binding)//GO:0005543(phospholipid binding)
ENSG00000065361	7.44961	2.89716	8.0531e-11	3.9939e-09	up	62	12	2.57167	-0.125541	chr12	56076799	56103505	+	chr12:56076799-56103505	ERBB3	protein_coding	2065	ErbB-3|FERLK|HER3|LCCS2|MDA-BF-1|c-erbB-3|c-erbB3|erbB3-S|p180-ErbB3|p45-sErbB3|p85-sErbB3	MIM:190151|HGNC:HGNC:3431|Ensembl:ENSG00000065361	12q13.2	erb-b2 receptor tyrosine kinase 3	hsa01521(EGFR tyrosine kinase inhibitor resistance)//hsa04010(MAPK signaling pathway)//hsa04012(ErbB signaling pathway)//hsa04020(Calcium signaling pathway)//hsa04151(PI3K-Akt signaling pathway)//hsa05205(Proteoglycans in cancer)//hsa05206(MicroRNAs in cancer)	GO:0014068(positive regulation of phosphatidylinositol 3-kinase signaling)//GO:0007162(negative regulation of cell adhesion)//GO:0006468(protein phosphorylation)//GO:0016310(phosphorylation)//GO:0007165(signal transduction)//GO:0007169(transmembrane receptor protein tyrosine kinase signaling pathway)//GO:0018108(peptidyl-tyrosine phosphorylation)//GO:0007399(nervous system development)//GO:000016…	GO:0005615(extracellular space)//GO:0016020(membrane)//GO:0016021(integral component of membrane)//GO:0005886(plasma membrane)//GO:0005576(extracellular region)//GO:0005887(integral component of plasma membrane)//GO:0043235(receptor complex)//GO:0009925(basal plasma membrane)//GO:0016323(basolateral plasma membrane)//GO:0038143(ERBB3:ERBB2 complex)//GO:0016324(apical plasma membrane)//GO:0016328(…	GO:0000166(nucleotide binding)//GO:0004672(protein kinase activity)//GO:0005524(ATP binding)//GO:0016301(kinase activity)//GO:0016740(transferase activity)//GO:0005515(protein binding)//GO:0042802(identical protein binding)//GO:0046982(protein heterodimerization activity)//GO:0019838(growth factor binding)//GO:0004714(transmembrane receptor protein tyrosine kinase activity)//GO:0004888(transmembr…
ENSG00000065534	2.28706	1.19349	5.10043e-06	6.64188e-05	up	212	135	4.32001	3.13919	chr3	123610049	123884332	-	chr3:123610049-123884332	MYLK	protein_coding	4638	AAT7|KRP|MLCK|MLCK1|MLCK108|MLCK210|MMIHS|MSTP083|MYLK1|smMLCK	MIM:600922|HGNC:HGNC:7590|Ensembl:ENSG00000065534	3q21.1	myosin light chain kinase	hsa04020(Calcium signaling pathway)//hsa04022(cGMP-PKG signaling pathway)//hsa04270(Vascular smooth muscle contraction)//hsa04371(Apelin signaling pathway)//hsa04510(Focal adhesion)//hsa04611(Platelet activation)//hsa04810(Regulation of actin cytoskeleton)//hsa04921(Oxytocin signaling pathway)//hsa04971(Gastric acid secretion)	GO:0006468(protein phosphorylation)//GO:0060414(aorta smooth muscle tissue morphogenesis)//GO:0016310(phosphorylation)//GO:0030335(positive regulation of cell migration)//GO:0051928(positive regulation of calcium ion transport)//GO:0006936(muscle contraction)//GO:0006939(smooth muscle contraction)//GO:0090303(positive regulation of wound healing)//GO:0032060(bleb assembly)//GO:0071476(cellular hy…	GO:0005737(cytoplasm)//GO:0005856(cytoskeleton)//GO:0005886(plasma membrane)//GO:0042995(cell projection)//GO:0015629(actin cytoskeleton)//GO:0030027(lamellipodium)//GO:0032154(cleavage furrow)//GO:0005829(cytosol)//GO:0001725(stress fiber)	GO:0005524(ATP binding)//GO:0005515(protein binding)//GO:0004672(protein kinase activity)//GO:0046872(metal ion binding)//GO:0000166(nucleotide binding)//GO:0004674(protein serine/threonine kinase activity)//GO:0016301(kinase activity)//GO:0016740(transferase activity)//GO:0003779(actin binding)//GO:0005516(calmodulin binding)//GO:0004687(myosin light chain kinase activity)
ENSG00000065609	8.80645	3.13856	2.89899e-21	9.47493e-19	up	170	28	4.00409	0.95864	chr6	83552880	83709691	-	chr6:83552880-83709691	SNAP91	protein_coding	9892	AP180|CALM	MIM:607923|HGNC:HGNC:14986|Ensembl:ENSG00000065609	6q14.2	synaptosome associated protein 91		GO:0048268(clathrin coat assembly)//GO:0015031(protein transport)//GO:0072583(clathrin-dependent endocytosis)//GO:0006900(vesicle budding from membrane)//GO:0016185(synaptic vesicle budding from presynaptic endocytic zone membrane)//GO:2000369(regulation of clathrin-dependent endocytosis)	GO:0030136(clathrin-coated vesicle)//GO:0016020(membrane)//GO:0005886(plasma membrane)//GO:0005905(clathrin-coated pit)//GO:0008021(synaptic vesicle)//GO:0098894(extrinsic component of presynaptic endocytic zone membrane)	GO:0005543(phospholipid binding)//GO:0005545(1-phosphatidylinositol binding)//GO:0030276(clathrin binding)//GO:0005515(protein binding)//GO:0005546(phosphatidylinositol-4,5-bisphosphate binding)//GO:0000149(SNARE binding)//GO:0019901(protein kinase binding)//GO:0032050(clathrin heavy chain binding)
ENSG00000065618	2.20081	1.13803	0.0028866	0.0144707	up	56	37	2.42863	1.33403	chr10	104031286	104085880	-	chr10:104031286-104085880	COL17A1	protein_coding	1308	BA16H23.2|BP180|BPA-2|BPAG2|ERED|LAD-1	MIM:113811|HGNC:HGNC:2194|Ensembl:ENSG00000065618	10q25.1	collagen type XVII alpha 1 chain	hsa04974(Protein digestion and absorption)	GO:0050776(regulation of immune response)//GO:0030198(extracellular matrix organization)//GO:0008544(epidermis development)//GO:0007160(cell-matrix adhesion)//GO:0031581(hemidesmosome assembly)	GO:0016020(membrane)//GO:0016021(integral component of membrane)//GO:0005576(extracellular region)//GO:0030054(cell junction)//GO:0005581(collagen trimer)//GO:0005604(basement membrane)//GO:0005615(extracellular space)//GO:0005886(plasma membrane)//GO:0031012(extracellular matrix)//GO:0062023(collagen-containing extracellular matrix)//GO:0005887(integral component of plasma membrane)//GO:0005788(…	GO:0005515(protein binding)//GO:0005201(extracellular matrix structural constituent)//GO:0030020(extracellular matrix structural constituent conferring tensile strength)
ENSG00000065621	5.89015	2.5583	8.80985e-08	1.91287e-06	up	49	12	2.24158	-0.125541	chr10	104268873	104304950	+	chr10:104268873-104304950	GSTO2	protein_coding	119391	GSTO 2-2|bA127L20.1	MIM:612314|HGNC:HGNC:23064|Ensembl:ENSG00000065621	10q25.1	glutathione S-transferase omega 2	hsa00480(Glutathione metabolism)//hsa00980(Metabolism of xenobiotics by cytochrome P450)//hsa00982(Drug metabolism - cytochrome P450)//hsa00983(Drug metabolism - other enzymes)//hsa01100(Metabolic pathways)//hsa01524(Platinum drug resistance)//hsa05200(Pathways in cancer)//hsa05204(Chemical carcinogenesis)//hsa05225(Hepatocellular carcinoma)//hsa05418(Fluid shear stress and atherosclerosis)	GO:0055114(oxidation-reduction process)//GO:0098869(cellular oxidant detoxification)//GO:0006749(glutathione metabolic process)//GO:0006805(xenobiotic metabolic process)//GO:0071243(cellular response to arsenic-containing substance)//GO:1901687(glutathione derivative biosynthetic process)//GO:0019852(L-ascorbic acid metabolic process)	GO:0005737(cytoplasm)//GO:0005829(cytosol)//GO:0070062(extracellular exosome)	GO:0005515(protein binding)//GO:0004364(glutathione transferase activity)//GO:0016740(transferase activity)//GO:0016491(oxidoreductase activity)//GO:0042802(identical protein binding)//GO:0045174(glutathione dehydrogenase (ascorbate) activity)//GO:0050610(methylarsonate reductase activity)
ENSG00000065923	3.63064	1.86022	9.42643e-12	5.85166e-10	up	222	89	4.38602	2.55046	chrX	46599251	46759118	-	chrX:46599251-46759118	SLC9A7	protein_coding	84679	MRX108|NHE-7|NHE7|SLC9A6	MIM:300368|HGNC:HGNC:17123|Ensembl:ENSG00000065923	Xp11.3|Xp11.3	solute carrier family 9 member A7	hsa04260(Cardiac muscle contraction)	GO:0055085(transmembrane transport)//GO:0006814(sodium ion transport)//GO:0006885(regulation of pH)//GO:0006812(cation transport)//GO:0006811(ion transport)//GO:0006813(potassium ion transport)//GO:0035725(sodium ion transmembrane transport)//GO:1902600(proton transmembrane transport)//GO:0098656(anion transmembrane transport)//GO:0071805(potassium ion transmembrane transport)//GO:0051453(regulat…	GO:0016021(integral component of membrane)//GO:0016020(membrane)//GO:0043231(intracellular membrane-bounded organelle)//GO:0005886(plasma membrane)//GO:0005794(Golgi apparatus)//GO:0005768(endosome)//GO:0010008(endosome membrane)//GO:0005802(trans-Golgi network)//GO:0055038(recycling endosome membrane)//GO:0000139(Golgi membrane)//GO:0055037(recycling endosome)	GO:0015385(sodium:proton antiporter activity)//GO:0015299(solute:proton antiporter activity)//GO:0015297(antiporter activity)//GO:0005515(protein binding)//GO:0015386(potassium:proton antiporter activity)
ENSG00000066056	2.53133	1.33989	0.0156043	0.0581936	up	21	12	1.0776	-0.125541	chr1	43300982	43323108	+	chr1:43300982-43323108	TIE1	protein_coding	7075	JTK14|TIE	MIM:600222|HGNC:HGNC:11809|Ensembl:ENSG00000066056	1p34.2	tyrosine kinase with immunoglobulin like and EGF like domains 1		GO:0006468(protein phosphorylation)//GO:0016310(phosphorylation)//GO:0018108(peptidyl-tyrosine phosphorylation)//GO:0001525(angiogenesis)//GO:0045766(positive regulation of angiogenesis)//GO:0007165(signal transduction)//GO:0007169(transmembrane receptor protein tyrosine kinase signaling pathway)//GO:0007275(multicellular organism development)//GO:0033674(positive regulation of kinase activity)//…	GO:0016020(membrane)//GO:0016021(integral component of membrane)//GO:0005886(plasma membrane)//GO:0005887(integral component of plasma membrane)//GO:0043235(receptor complex)	GO:0005524(ATP binding)//GO:0005515(protein binding)//GO:0004672(protein kinase activity)//GO:0004713(protein tyrosine kinase activity)//GO:0000166(nucleotide binding)//GO:0016301(kinase activity)//GO:0016740(transferase activity)//GO:0004714(transmembrane receptor protein tyrosine kinase activity)
ENSG00000066185	4.26223	2.09161	3.82942e-09	1.22745e-07	up	91	31	3.11389	1.09492	chr1	42430329	42456253	-	chr1:42430329-42456253	ZMYND12	protein_coding	84217	-	HGNC:HGNC:21192|Ensembl:ENSG00000066185	1p34.2	zinc finger MYND-type containing 12				GO:0005515(protein binding)//GO:0046872(metal ion binding)
ENSG00000066248	2.20629	1.14162	0.00921389	0.037697	up	41	27	1.99312	0.910197	chr2	232878701	233013256	-	chr2:232878701-233013256	NGEF	protein_coding	25791	ARHGEF27|EPHEXIN	MIM:605991|HGNC:HGNC:7807|Ensembl:ENSG00000066248	2q37.1	neuronal guanine nucleotide exchange factor	hsa04360(Axon guidance)	GO:0007275(multicellular organism development)//GO:0030154(cell differentiation)//GO:0007399(nervous system development)//GO:0090630(activation of GTPase activity)//GO:0051056(regulation of small GTPase mediated signal transduction)//GO:0007186(G protein-coupled receptor signaling pathway)//GO:0048013(ephrin receptor signaling pathway)//GO:0043087(regulation of GTPase activity)//GO:0043065(positi…	GO:0005737(cytoplasm)//GO:0016020(membrane)//GO:0042995(cell projection)//GO:0030426(growth cone)//GO:0005829(cytosol)	GO:0005515(protein binding)//GO:0005085(guanyl-nucleotide exchange factor activity)
ENSG00000066294	3.04298	1.60549	1.71022e-13	1.53589e-11	up	1654	792	7.27457	5.67169	chr1	160541095	160579516	-	chr1:160541095-160579516	CD84	protein_coding	8832	LY9B|SLAMF5|hCD84|mCD84	MIM:604513|HGNC:HGNC:1704|Ensembl:ENSG00000066294	1q23.3	CD84 molecule		GO:0007155(cell adhesion)//GO:0006914(autophagy)//GO:0002376(immune system process)//GO:0045087(innate immune response)//GO:0002250(adaptive immune response)//GO:0050900(leukocyte migration)//GO:0043305(negative regulation of mast cell degranulation)//GO:0006952(defense response)//GO:0007156(homophilic cell adhesion via plasma membrane adhesion molecules)//GO:2001256(regulation of store-operated …	GO:0016020(membrane)//GO:0016021(integral component of membrane)//GO:0043231(intracellular membrane-bounded organelle)//GO:0005886(plasma membrane)//GO:0005887(integral component of plasma membrane)	GO:0005515(protein binding)//GO:0042802(identical protein binding)
ENSG00000066405	2.33748	1.22495	6.37646e-05	0.000586382	up	106	66	3.33055	2.13165	chr3	137998735	138033655	+	chr3:137998735-138033655	CLDN18	protein_coding	51208	SFTA5|SFTPJ	MIM:609210|HGNC:HGNC:2039|Ensembl:ENSG00000066405	3q22.3	claudin 18	hsa04514(Cell adhesion molecules)//hsa04530(Tight junction)//hsa04670(Leukocyte transendothelial migration)//hsa05130(Pathogenic Escherichia coli infection)//hsa05160(Hepatitis C)	GO:0007155(cell adhesion)//GO:0070830(bicellular tight junction assembly)//GO:0016338(calcium-independent cell-cell adhesion via plasma membrane cell-adhesion molecules)//GO:0045471(response to ethanol)//GO:0045779(negative regulation of bone resorption)//GO:0048565(digestive tract development)//GO:0071847(TNFSF11-mediated signaling pathway)//GO:1900181(negative regulation of protein localization…	GO:0016021(integral component of membrane)//GO:0005923(bicellular tight junction)//GO:0016020(membrane)//GO:0005886(plasma membrane)//GO:0030054(cell junction)	GO:0005198(structural molecule activity)//GO:0005515(protein binding)//GO:0042802(identical protein binding)
ENSG00000066923	3.96857	1.98862	3.87161e-08	9.44777e-07	up	82	30	2.96632	1.05091	chr7	100177563	100221488	+	chr7:100177563-100221488	STAG3	protein_coding	10734	-	MIM:608489|HGNC:HGNC:11356|Ensembl:ENSG00000066923	7q22.1	stromal antigen 3	hsa04114(Oocyte meiosis)	GO:0007049(cell cycle)//GO:0007059(chromosome segregation)//GO:0051321(meiotic cell cycle)//GO:0007062(sister chromatid cohesion)//GO:0007130(synaptonemal complex assembly)//GO:0007129(homologous chromosome pairing at meiosis)//GO:0034502(protein localization to chromosome)	GO:0005634(nucleus)//GO:0005654(nucleoplasm)//GO:0005730(nucleolus)//GO:0005694(chromosome)//GO:0005615(extracellular space)//GO:0000775(chromosome, centromeric region)//GO:0000785(chromatin)//GO:0000795(synaptonemal complex)//GO:0030893(meiotic cohesin complex)//GO:0008278(cohesin complex)//GO:0000794(condensed nuclear chromosome)//GO:0000800(lateral element)//GO:0000802(transverse filament)//GO…	GO:0003682(chromatin binding)
ENSG00000067113	2.50998	1.32768	2.94749e-06	4.13832e-05	up	150	87	3.82527	2.5185	chr5	55424854	55534969	-	chr5:55424854-55534969	PLPP1	protein_coding	8611	LLP1a|LPP1|PAP-2a|PAP2|PPAP2A	MIM:607124|HGNC:HGNC:9228|Ensembl:ENSG00000067113	5q11.2	phospholipid phosphatase 1	hsa00561(Glycerolipid metabolism)//hsa00564(Glycerophospholipid metabolism)//hsa00565(Ether lipid metabolism)//hsa00600(Sphingolipid metabolism)//hsa01100(Metabolic pathways)//hsa04072(Phospholipase D signaling pathway)//hsa04666(Fc gamma R-mediated phagocytosis)//hsa04975(Fat digestion and absorption)//hsa05231(Choline metabolism in cancer)	GO:0006644(phospholipid metabolic process)//GO:0006629(lipid metabolic process)//GO:0007165(signal transduction)//GO:0019216(regulation of lipid metabolic process)//GO:0006670(sphingosine metabolic process)//GO:0006672(ceramide metabolic process)//GO:0046839(phospholipid dephosphorylation)//GO:0008285(negative regulation of cell population proliferation)//GO:0007205(protein kinase C-activating G …	GO:0005886(plasma membrane)//GO:0016020(membrane)//GO:0016021(integral component of membrane)//GO:0005901(caveola)//GO:0016324(apical plasma membrane)//GO:0045121(membrane raft)//GO:0005887(integral component of plasma membrane)//GO:0070062(extracellular exosome)	GO:0008195(phosphatidate phosphatase activity)//GO:0016787(hydrolase activity)//GO:0000810(diacylglycerol diphosphate phosphatase activity)//GO:0042392(sphingosine-1-phosphate phosphatase activity)//GO:0042577(lipid phosphatase activity)//GO:0106235(ceramide-1-phosphate phosphatase activity)//GO:0005515(protein binding)
ENSG00000067141	2.01746	1.01254	0.000155255	0.00123813	up	169	122	3.99565	2.99567	chr15	73051710	73305205	+	chr15:73051710-73305205	NEO1	protein_coding	4756	IGDCC2|NGN|NTN1R2	MIM:601907|HGNC:HGNC:7754|Ensembl:ENSG00000067141	15q24.1	neogenin 1	hsa04350(TGF-beta signaling pathway)//hsa04360(Axon guidance)//hsa04514(Cell adhesion molecules)	GO:0007411(axon guidance)//GO:0007399(nervous system development)//GO:0030513(positive regulation of BMP signaling pathway)//GO:0055072(iron ion homeostasis)//GO:0007155(cell adhesion)	GO:0016021(integral component of membrane)//GO:0005887(integral component of plasma membrane)//GO:0016020(membrane)//GO:0005794(Golgi apparatus)//GO:0005654(nucleoplasm)//GO:0005886(plasma membrane)//GO:0098797(plasma membrane protein complex)	GO:0005515(protein binding)//GO:0038023(signaling receptor activity)//GO:0039706(co-receptor binding)
ENSG00000067840	3.73091	1.89953	0.000287197	0.00210672	up	31	12	1.6068	-0.125541	chrX	153802166	153830565	-	chrX:153802166-153830565	PDZD4	protein_coding	57595	LNX5|LU1|PDZK4|PDZRN4L	MIM:300634|HGNC:HGNC:21167|Ensembl:ENSG00000067840	Xq28	PDZ domain containing 4			GO:0005737(cytoplasm)//GO:0005938(cell cortex)	GO:0005515(protein binding)
ENSG00000067842	2.34221	1.22787	9.27462e-05	0.000805699	up	103	64	3.28974	2.08876	chrX	153517642	153582939	+	chrX:153517642-153582939	ATP2B3	protein_coding	492	CFAP39|CLA2|OPCA|PMCA3|PMCA3a|SCAX1	MIM:300014|HGNC:HGNC:816|Ensembl:ENSG00000067842	Xq28	ATPase plasma membrane Ca2+ transporting 3	hsa04020(Calcium signaling pathway)//hsa04022(cGMP-PKG signaling pathway)//hsa04024(cAMP signaling pathway)//hsa04261(Adrenergic signaling in cardiomyocytes)//hsa04925(Aldosterone synthesis and secretion)//hsa04961(Endocrine and other factor-regulated calcium reabsorption)//hsa04970(Salivary secretion)//hsa04972(Pancreatic secretion)//hsa04978(Mineral absorption)	GO:0070588(calcium ion transmembrane transport)//GO:0006811(ion transport)//GO:0006816(calcium ion transport)//GO:0099509(regulation of presynaptic cytosolic calcium ion concentration)//GO:0034220(ion transmembrane transport)//GO:1903779(regulation of cardiac conduction)//GO:0006874(cellular calcium ion homeostasis)//GO:0051480(regulation of cytosolic calcium ion concentration)//GO:1990034(calciu…	GO:0016021(integral component of membrane)//GO:0016020(membrane)//GO:0005886(plasma membrane)//GO:0098793(presynapse)//GO:0043231(intracellular membrane-bounded organelle)//GO:0005887(integral component of plasma membrane)//GO:1903561(extracellular vesicle)//GO:0098978(glutamatergic synapse)//GO:0098982(GABA-ergic synapse)	GO:0005524(ATP binding)//GO:0000166(nucleotide binding)//GO:0005388(calcium transmembrane transporter activity, phosphorylative mechanism)//GO:0046872(metal ion binding)//GO:0005516(calmodulin binding)//GO:0030165(PDZ domain binding)//GO:0005515(protein binding)//GO:0015085(calcium ion transmembrane transporter activity)//GO:0019829(ATPase-coupled cation transmembrane transporter activity)//GO:19…
ENSG00000067992	2.31482	1.2109	2.69433e-08	6.8604e-07	up	1174	739	6.7806	5.57206	chrX	24465270	24550466	+	chrX:24465270-24550466	PDK3	protein_coding	5165	CMTX6|GS1-358P8.4	MIM:300906|HGNC:HGNC:8811|Ensembl:ENSG00000067992	Xp22.11	pyruvate dehydrogenase kinase 3	hsa05415(Diabetic cardiomyopathy)	GO:0016310(phosphorylation)//GO:0005975(carbohydrate metabolic process)//GO:0006006(glucose metabolic process)//GO:0071398(cellular response to fatty acid)//GO:0042593(glucose homeostasis)//GO:1904183(negative regulation of pyruvate dehydrogenase activity)//GO:0018105(peptidyl-serine phosphorylation)//GO:0035357(peroxisome proliferator activated receptor signaling pathway)//GO:0010510(regulation …	GO:0005730(nucleolus)//GO:0005739(mitochondrion)//GO:0005759(mitochondrial matrix)	GO:0004672(protein kinase activity)//GO:0000166(nucleotide binding)//GO:0004674(protein serine/threonine kinase activity)//GO:0005524(ATP binding)//GO:0016301(kinase activity)//GO:0016740(transferase activity)//GO:0005515(protein binding)//GO:0004740(pyruvate dehydrogenase (acetyl-transferring) kinase activity)
ENSG00000068971	3.46943	1.7947	1.22731e-09	4.54811e-08	up	155	65	3.8721	2.11036	chr11	64917553	64934475	+	chr11:64917553-64934475	PPP2R5B	protein_coding	5526	B56B|B56beta|PR61B	MIM:601644|HGNC:HGNC:9310|Ensembl:ENSG00000068971	11q13.1	protein phosphatase 2 regulatory subunit B'beta	hsa03015(mRNA surveillance pathway)//hsa04071(Sphingolipid signaling pathway)//hsa04114(Oocyte meiosis)//hsa04151(PI3K-Akt signaling pathway)//hsa04152(AMPK signaling pathway)//hsa04261(Adrenergic signaling in cardiomyocytes)//hsa04728(Dopaminergic synapse)//hsa05165(Human papillomavirus infection)	GO:0007165(signal transduction)//GO:0043666(regulation of phosphoprotein phosphatase activity)//GO:0001932(regulation of protein phosphorylation)//GO:0010469(regulation of signaling receptor activity)//GO:0010976(positive regulation of neuron projection development)//GO:0031334(positive regulation of protein-containing complex assembly)//GO:0031952(regulation of protein autophosphorylation)//GO:0…	GO:0000159(protein phosphatase type 2A complex)//GO:0005737(cytoplasm)//GO:0005634(nucleus)//GO:0005829(cytosol)	GO:0019888(protein phosphatase regulator activity)//GO:0005515(protein binding)//GO:0072542(protein phosphatase activator activity)
ENSG00000069020	2.37892	1.25031	1.59872e-05	0.000178879	up	134	82	3.66432	2.43536	chr5	66596361	67169595	+	chr5:66596361-67169595	MAST4	protein_coding	375449	-	MIM:618002|HGNC:HGNC:19037|Ensembl:ENSG00000069020	5q12.3	microtubule associated serine/threonine kinase family member 4		GO:0006468(protein phosphorylation)//GO:0016310(phosphorylation)//GO:0035556(intracellular signal transduction)//GO:0007010(cytoskeleton organization)//GO:0018105(peptidyl-serine phosphorylation)	GO:0005737(cytoplasm)	GO:0005524(ATP binding)//GO:0005515(protein binding)//GO:0000287(magnesium ion binding)//GO:0004674(protein serine/threonine kinase activity)//GO:0004672(protein kinase activity)//GO:0046872(metal ion binding)//GO:0000166(nucleotide binding)//GO:0016301(kinase activity)//GO:0016740(transferase activity)
ENSG00000069493	5.51308	2.46286	2.63396e-22	9.72467e-20	up	462	122	5.43809	2.99567	chr12	9664969	9699553	+	chr12:9664969-9699553	CLEC2D	protein_coding	29121	CLAX|LLT1|OCIL	MIM:605659|HGNC:HGNC:14351|Ensembl:ENSG00000069493	12p13.31	C-type lectin domain family 2 member D		GO:0050776(regulation of immune response)//GO:0007166(cell surface receptor signaling pathway)	GO:0016020(membrane)//GO:0016021(integral component of membrane)//GO:0005783(endoplasmic reticulum)//GO:0005886(plasma membrane)//GO:0009986(cell surface)//GO:0009897(external side of plasma membrane)//GO:0005887(integral component of plasma membrane)	GO:0030246(carbohydrate binding)//GO:0005515(protein binding)//GO:0004888(transmembrane signaling receptor activity)//GO:0046703(natural killer cell lectin-like receptor binding)
ENSG00000069509	118.95	6.89421	0.000187	0.00145804	up	12	0	0.343487	-2.77056	chrX	44523639	44542859	-	chrX:44523639-44542859	FUNDC1	protein_coding	139341	-	MIM:300871|HGNC:HGNC:28746|Ensembl:ENSG00000069509	Xp11.3	FUN14 domain containing 1	hsa04137(Mitophagy - animal)	GO:0006914(autophagy)//GO:0000422(autophagy of mitochondrion)//GO:0001666(response to hypoxia)//GO:0016236(macroautophagy)//GO:0010243(response to organonitrogen compound)	GO:0016020(membrane)//GO:0016021(integral component of membrane)//GO:0005739(mitochondrion)//GO:0005741(mitochondrial outer membrane)//GO:0031307(integral component of mitochondrial outer membrane)	GO:0005515(protein binding)
ENSG00000069535	99.2913	6.6336	0.00126829	0.00735485	up	10	0	0.1134	-2.77056	chrX	43766610	43882450	-	chrX:43766610-43882450	MAOB	protein_coding	4129	-	MIM:309860|HGNC:HGNC:6834|Ensembl:ENSG00000069535	Xp11.3	monoamine oxidase B	hsa00260(Glycine, serine and threonine metabolism)//hsa00330(Arginine and proline metabolism)//hsa00340(Histidine metabolism)//hsa00350(Tyrosine metabolism)//hsa00360(Phenylalanine metabolism)//hsa00380(Tryptophan metabolism)//hsa00982(Drug metabolism - cytochrome P450)//hsa01100(Metabolic pathways)//hsa04726(Serotonergic synapse)//hsa04728(Dopaminergic synapse)//hsa05012(Parkinson disease)//hsa0…	GO:0055114(oxidation-reduction process)//GO:0022900(electron transport chain)//GO:0021762(substantia nigra development)//GO:0042420(dopamine catabolic process)//GO:0009636(response to toxic substance)//GO:0010044(response to aluminum ion)//GO:0010269(response to selenium ion)//GO:0014063(negative regulation of serotonin secretion)//GO:0032496(response to lipopolysaccharide)//GO:0042135(neurotrans…	GO:0016020(membrane)//GO:0016021(integral component of membrane)//GO:0005739(mitochondrion)//GO:0005741(mitochondrial outer membrane)//GO:0005740(mitochondrial envelope)	GO:0016491(oxidoreductase activity)//GO:0005515(protein binding)//GO:0009055(electron transfer activity)//GO:0008131(primary amine oxidase activity)//GO:0042802(identical protein binding)//GO:0050660(flavin adenine dinucleotide binding)
ENSG00000069667	3.84618	1.94343	1.49556e-15	1.97464e-13	up	478	181	5.48705	3.55611	chr15	60488284	61229302	-	chr15:60488284-61229302	RORA	protein_coding	6095	IDDECA|NR1F1|ROR1|ROR2|ROR3|RZR-ALPHA|RZRA	MIM:600825|HGNC:HGNC:10258|Ensembl:ENSG00000069667	15q22.2	RAR related orphan receptor A	hsa04659(Th17 cell differentiation)//hsa04710(Circadian rhythm)//hsa05017(Spinocerebellar ataxia)//hsa05321(Inflammatory bowel disease)	GO:0006355(regulation of transcription, DNA-templated)//GO:0007275(multicellular organism development)//GO:0048511(rhythmic process)//GO:0032922(circadian regulation of gene expression)//GO:0045893(positive regulation of transcription, DNA-templated)//GO:0001525(angiogenesis)//GO:0006357(regulation of transcription by RNA polymerase II)//GO:0006805(xenobiotic metabolic process)//GO:0050728(negati…	GO:0005634(nucleus)//GO:0000785(chromatin)//GO:0005654(nucleoplasm)	GO:0003677(DNA binding)//GO:0008270(zinc ion binding)//GO:0003700(DNA-binding transcription factor activity)//GO:0043565(sequence-specific DNA binding)//GO:0004879(nuclear receptor activity)//GO:0046872(metal ion binding)//GO:0005515(protein binding)//GO:0000978(RNA polymerase II cis-regulatory region sequence-specific DNA binding)//GO:0000981(DNA-binding transcription factor activity, RNA polyme…
ENSG00000069812	50.1457	5.64805	0.0336166	0.10732	up	5	0	-0.703312	-2.77056	chr1	6412418	6424670	-	chr1:6412418-6424670	HES2	protein_coding	54626	bHLHb40	MIM:609970|HGNC:HGNC:16005|Ensembl:ENSG00000069812	1p36.31	hes family bHLH transcription factor 2	hsa05165(Human papillomavirus infection)	GO:0006355(regulation of transcription, DNA-templated)//GO:0006357(regulation of transcription by RNA polymerase II)//GO:0009952(anterior/posterior pattern specification)//GO:0050767(regulation of neurogenesis)//GO:0000122(negative regulation of transcription by RNA polymerase II)//GO:0045892(negative regulation of transcription, DNA-templated)	GO:0005634(nucleus)//GO:0000785(chromatin)	GO:0046983(protein dimerization activity)//GO:0003677(DNA binding)//GO:0000981(DNA-binding transcription factor activity, RNA polymerase II-specific)//GO:0000978(RNA polymerase II cis-regulatory region sequence-specific DNA binding)//GO:1990837(sequence-specific double-stranded DNA binding)//GO:0008134(transcription factor binding)//GO:0001227(DNA-binding transcription repressor activity, RNA pol…
ENSG00000070159	2.06741	1.04782	0.000122161	0.00101227	up	159	112	3.90849	2.87465	chr9	109375466	109498313	-	chr9:109375466-109498313	PTPN3	protein_coding	5774	PTP-H1|PTPH1	MIM:176877|HGNC:HGNC:9655|Ensembl:ENSG00000070159	9q31.3	protein tyrosine phosphatase non-receptor type 3		GO:0006470(protein dephosphorylation)//GO:0016311(dephosphorylation)//GO:0045930(negative regulation of mitotic cell cycle)//GO:0035335(peptidyl-tyrosine dephosphorylation)//GO:2000649(regulation of sodium ion transmembrane transporter activity)//GO:0042059(negative regulation of epidermal growth factor receptor signaling pathway)//GO:0051045(negative regulation of membrane protein ectodomain pro…	GO:0005856(cytoskeleton)//GO:0005737(cytoplasm)//GO:0016020(membrane)//GO:0005886(plasma membrane)//GO:0009898(cytoplasmic side of plasma membrane)	GO:0005515(protein binding)//GO:0016791(phosphatase activity)//GO:0004725(protein tyrosine phosphatase activity)//GO:0008092(cytoskeletal protein binding)//GO:0016787(hydrolase activity)//GO:0004721(phosphoprotein phosphatase activity)//GO:0017080(sodium channel regulator activity)//GO:0051117(ATPase binding)//GO:0001784(phosphotyrosine residue binding)
ENSG00000070540	9.38355	3.23013	5.38795e-15	6.35619e-13	up	91	14	3.11389	0.0635202	chr17	68420948	68457513	-	chr17:68420948-68457513	WIPI1	protein_coding	55062	ATG18|ATG18A|WIPI49	MIM:609224|HGNC:HGNC:25471|Ensembl:ENSG00000070540	17q24.2	WD repeat domain, phosphoinositide interacting 1	hsa04136(Autophagy - other)//hsa04140(Autophagy - animal)//hsa05010(Alzheimer disease)//hsa05014(Amyotrophic lateral sclerosis)//hsa05016(Huntington disease)//hsa05017(Spinocerebellar ataxia)//hsa05022(Pathways of neurodegeneration - multiple diseases)//hsa05131(Shigellosis)	GO:0006914(autophagy)//GO:0000045(autophagosome assembly)//GO:0000422(autophagy of mitochondrion)//GO:0009267(cellular response to starvation)//GO:0034497(protein localization to phagophore assembly site)//GO:0036498(IRE1-mediated unfolded protein response)//GO:0016236(macroautophagy)//GO:0044804(autophagy of nucleus)//GO:0006497(protein lipidation)//GO:0048203(vesicle targeting, trans-Golgi to e…	GO:0005737(cytoplasm)//GO:0016020(membrane)//GO:0000407(phagophore assembly site)//GO:0005856(cytoskeleton)//GO:0005794(Golgi apparatus)//GO:0005768(endosome)//GO:0031410(cytoplasmic vesicle)//GO:0010008(endosome membrane)//GO:0005802(trans-Golgi network)//GO:0000421(autophagosome membrane)//GO:0034045(phagophore assembly site membrane)//GO:0030136(clathrin-coated vesicle)//GO:0005829(cytosol)//G…	GO:0005515(protein binding)//GO:0032266(phosphatidylinositol-3-phosphate binding)//GO:0008289(lipid binding)//GO:0080025(phosphatidylinositol-3,5-bisphosphate binding)//GO:0030331(estrogen receptor binding)//GO:0050681(androgen receptor binding)//GO:0005102(signaling receptor binding)
ENSG00000070614	2.06163	1.04379	3.0606e-05	0.000311481	up	259	183	4.60697	3.57177	chr5	150485818	150558211	+	chr5:150485818-150558211	NDST1	protein_coding	3340	HSST|MRT46|NST1	MIM:600853|HGNC:HGNC:7680|Ensembl:ENSG00000070614	5q33.1	N-deacetylase and N-sulfotransferase 1	hsa00534(Glycosaminoglycan biosynthesis - heparan sulfate / heparin)//hsa01100(Metabolic pathways)	GO:0030210(heparin biosynthetic process)//GO:0008152(metabolic process)//GO:0006954(inflammatory response)//GO:0015012(heparan sulfate proteoglycan biosynthetic process)//GO:0006024(glycosaminoglycan biosynthetic process)//GO:0015014(heparan sulfate proteoglycan biosynthetic process, polysaccharide chain biosynthetic process)//GO:0000271(polysaccharide biosynthetic process)//GO:0003279(cardiac se…	GO:0016020(membrane)//GO:0016021(integral component of membrane)//GO:0000139(Golgi membrane)//GO:0005794(Golgi apparatus)	GO:0016787(hydrolase activity)//GO:0015016([heparan sulfate]-glucosamine N-sulfotransferase activity)//GO:0008146(sulfotransferase activity)//GO:0016740(transferase activity)//GO:0003824(catalytic activity)//GO:0005515(protein binding)//GO:0019213(deacetylase activity)//GO:0102140(heparan sulfate N-deacetylase activity)
ENSG00000070669	2.38263	1.25256	0.000807467	0.00502449	up	59	36	2.50192	1.29683	chr7	97851677	97872542	-	chr7:97851677-97872542	ASNS	protein_coding	440	ASNSD|TS11	MIM:108370|HGNC:HGNC:753|Ensembl:ENSG00000070669	7q21.3	asparagine synthetase (glutamine-hydrolyzing)	hsa00250(Alanine, aspartate and glutamate metabolism)//hsa01100(Metabolic pathways)//hsa01230(Biosynthesis of amino acids)	GO:0006529(asparagine biosynthetic process)//GO:0043066(negative regulation of apoptotic process)//GO:0008652(cellular amino acid biosynthetic process)//GO:0006541(glutamine metabolic process)//GO:0070981(L-asparagine biosynthetic process)//GO:0042149(cellular response to glucose starvation)//GO:0045931(positive regulation of mitotic cell cycle)//GO:0036499(PERK-mediated unfolded protein response…	GO:0005829(cytosol)	GO:0004066(asparagine synthase (glutamine-hydrolyzing) activity)//GO:0000166(nucleotide binding)//GO:0005524(ATP binding)//GO:0016874(ligase activity)//GO:0005515(protein binding)//GO:0042802(identical protein binding)
ENSG00000070731	9.01296	3.172	0.0433314	0.131053	up	7	1	-0.319755	-2.24658	chr17	76565377	76586956	-	chr17:76565377-76586956	ST6GALNAC2	protein_coding	10610	SAITL1|SIAT7|SIAT7B|SIATL1|ST6GalNAII|STHM	MIM:610137|HGNC:HGNC:10867|Ensembl:ENSG00000070731	17q25.1	ST6 N-acetylgalactosaminide alpha-2,6-sialyltransferase 2		GO:0006486(protein glycosylation)//GO:0097503(sialylation)//GO:0006493(protein O-linked glycosylation)//GO:1990743(protein sialylation)//GO:0016266(O-glycan processing)	GO:0016020(membrane)//GO:0016021(integral component of membrane)//GO:0005794(Golgi apparatus)//GO:0000139(Golgi membrane)	GO:0008373(sialyltransferase activity)//GO:0016740(transferase activity)//GO:0016757(transferase activity, transferring glycosyl groups)//GO:0001665(alpha-N-acetylgalactosaminide alpha-2,6-sialyltransferase activity)
ENSG00000070915	4.25134	2.08792	0.016576	0.0609578	up	12	4	0.343487	-1.31025	chr16	56865207	56915850	+	chr16:56865207-56915850	SLC12A3	protein_coding	6559	NCC|NCCT|TSC	MIM:600968|HGNC:HGNC:10912|Ensembl:ENSG00000070915	16q13	solute carrier family 12 member 3		GO:0006811(ion transport)//GO:0055085(transmembrane transport)//GO:0006814(sodium ion transport)//GO:0035725(sodium ion transmembrane transport)//GO:0006884(cell volume homeostasis)//GO:0055064(chloride ion homeostasis)//GO:0055075(potassium ion homeostasis)//GO:1902476(chloride transmembrane transport)//GO:1990573(potassium ion import across plasma membrane)//GO:0055078(sodium ion homeostasis)	GO:0016021(integral component of membrane)//GO:0016020(membrane)//GO:0005886(plasma membrane)//GO:0016324(apical plasma membrane)//GO:0070062(extracellular exosome)//GO:0005887(integral component of plasma membrane)//GO:0005829(cytosol)	GO:0022857(transmembrane transporter activity)//GO:0015377(cation:chloride symporter activity)//GO:0015293(symporter activity)//GO:0005515(protein binding)//GO:0015379(potassium:chloride symporter activity)//GO:0008511(sodium:potassium:chloride symporter activity)//GO:0015081(sodium ion transmembrane transporter activity)//GO:0015378(sodium:chloride symporter activity)
ENSG00000071242	2.90592	1.539	1.27818e-11	7.62968e-10	up	738	370	6.112	4.57844	chr6	166409364	166906451	-	chr6:166409364-166906451	RPS6KA2	protein_coding	6196	HU-2|MAPKAPK1C|RSK|RSK3|S6K-alpha|S6K-alpha2|p90-RSK3|p90RSK2|pp90RSK3	MIM:601685|HGNC:HGNC:10431|Ensembl:ENSG00000071242	6q27	ribosomal protein S6 kinase A2	hsa04010(MAPK signaling pathway)//hsa04114(Oocyte meiosis)//hsa04150(mTOR signaling pathway)//hsa04714(Thermogenesis)//hsa04720(Long-term potentiation)//hsa04722(Neurotrophin signaling pathway)//hsa04914(Progesterone-mediated oocyte maturation)//hsa04931(Insulin resistance)//hsa05135(Yersinia infection)	GO:0006468(protein phosphorylation)//GO:0035556(intracellular signal transduction)//GO:0016310(phosphorylation)//GO:0008285(negative regulation of cell population proliferation)//GO:0043065(positive regulation of apoptotic process)//GO:0018105(peptidyl-serine phosphorylation)//GO:0007165(signal transduction)//GO:0045786(negative regulation of cell cycle)	GO:0005634(nucleus)//GO:0005737(cytoplasm)//GO:0005654(nucleoplasm)//GO:0005829(cytosol)//GO:0005840(ribosome)	GO:0005524(ATP binding)//GO:0000287(magnesium ion binding)//GO:0004674(protein serine/threonine kinase activity)//GO:0004672(protein kinase activity)//GO:0004711(ribosomal protein S6 kinase activity)//GO:0046872(metal ion binding)//GO:0000166(nucleotide binding)//GO:0016301(kinase activity)//GO:0016740(transferase activity)//GO:0005515(protein binding)//GO:0004712(protein serine/threonine/tyrosin…
ENSG00000071575	2.19468	1.13401	0.000322904	0.00231907	up	95	63	3.17492	2.06683	chr2	12716910	12742734	+	chr2:12716910-12742734	TRIB2	protein_coding	28951	C5FW|GS3955|TRB2	MIM:609462|HGNC:HGNC:30809|Ensembl:ENSG00000071575	2p24.3	tribbles pseudokinase 2		GO:0006468(protein phosphorylation)//GO:0045599(negative regulation of fat cell differentiation)//GO:0006469(negative regulation of protein kinase activity)//GO:0043405(regulation of MAP kinase activity)//GO:0032436(positive regulation of proteasomal ubiquitin-dependent protein catabolic process)//GO:0032693(negative regulation of interleukin-10 production)	GO:0005737(cytoplasm)//GO:0005856(cytoskeleton)//GO:0005634(nucleus)	GO:0005524(ATP binding)//GO:0004672(protein kinase activity)//GO:0005515(protein binding)//GO:0004860(protein kinase inhibitor activity)//GO:0031625(ubiquitin protein ligase binding)//GO:0008134(transcription factor binding)//GO:0031434(mitogen-activated protein kinase kinase binding)//GO:0055106(ubiquitin-protein transferase regulator activity)
ENSG00000071967	2.3301	1.22039	4.34599e-08	1.04017e-06	up	806	504	6.2389	5.02198	chr2	171522247	171558129	+	chr2:171522247-171558129	CYBRD1	protein_coding	79901	CYB561A2|DCYTB|FRRS3	MIM:605745|HGNC:HGNC:20797|Ensembl:ENSG00000071967	2q31.1	cytochrome b reductase 1	hsa04978(Mineral absorption)	GO:0010039(response to iron ion)//GO:0055114(oxidation-reduction process)//GO:0006879(cellular iron ion homeostasis)	GO:0031526(brush border membrane)//GO:0016020(membrane)//GO:0016021(integral component of membrane)//GO:0005886(plasma membrane)//GO:0005765(lysosomal membrane)//GO:0070062(extracellular exosome)	GO:0016491(oxidoreductase activity)//GO:0000293(ferric-chelate reductase activity)//GO:0046872(metal ion binding)//GO:0005515(protein binding)
ENSG00000072041	187.753	7.5527	1.3552e-06	2.08638e-05	up	19	0	0.943718	-2.77056	chr12	84859491	84913629	-	chr12:84859491-84913629	SLC6A15	protein_coding	55117	NTT73|SBAT1|V7-3|hv7-3	MIM:607971|HGNC:HGNC:13621|Ensembl:ENSG00000072041	12q21.31	solute carrier family 6 member 15		GO:0006811(ion transport)//GO:0003333(amino acid transmembrane transport)//GO:0006814(sodium ion transport)//GO:0006836(neurotransmitter transport)//GO:0006865(amino acid transport)//GO:0035725(sodium ion transmembrane transport)//GO:1903825(organic acid transmembrane transport)//GO:0015804(neutral amino acid transport)//GO:0015824(proline transport)//GO:0015820(leucine transport)//GO:0055085(tra…	GO:0016021(integral component of membrane)//GO:0005887(integral component of plasma membrane)//GO:0016020(membrane)//GO:0005886(plasma membrane)	GO:0015293(symporter activity)//GO:0005515(protein binding)//GO:0015171(amino acid transmembrane transporter activity)//GO:0005326(neurotransmitter transmembrane transporter activity)//GO:0005298(proline:sodium symporter activity)
ENSG00000072315	2.32238	1.2156	2.84402e-05	0.000294224	up	134	84	3.66432	2.46919	chrX	111768011	112082776	-	chrX:111768011-112082776	TRPC5	protein_coding	7224	PPP1R159|TRP5	MIM:300334|HGNC:HGNC:12337|Ensembl:ENSG00000072315	Xq23	transient receptor potential cation channel subfamily C member 5	hsa04360(Axon guidance)//hsa04929(GnRH secretion)	GO:0006811(ion transport)//GO:0055085(transmembrane transport)//GO:0070588(calcium ion transmembrane transport)//GO:0006816(calcium ion transport)//GO:0007399(nervous system development)//GO:0051402(neuron apoptotic process)//GO:0070782(phosphatidylserine exposure on apoptotic cell surface)//GO:0006828(manganese ion transport)//GO:0051480(regulation of cytosolic calcium ion concentration)//GO:000…	GO:0016021(integral component of membrane)//GO:0016020(membrane)//GO:0005886(plasma membrane)//GO:0005887(integral component of plasma membrane)//GO:0034703(cation channel complex)//GO:0034704(calcium channel complex)//GO:0005737(cytoplasm)//GO:0030425(dendrite)//GO:0030426(growth cone)//GO:0043025(neuronal cell body)//GO:0045121(membrane raft)	GO:0005515(protein binding)//GO:0005262(calcium channel activity)//GO:0005216(ion channel activity)//GO:0015279(store-operated calcium channel activity)//GO:0070679(inositol 1,4,5 trisphosphate binding)//GO:0003779(actin binding)//GO:0030276(clathrin binding)//GO:0042805(actinin binding)//GO:0051117(ATPase binding)
ENSG00000072682	3.16741	1.6633	2.84334e-10	1.24588e-08	up	248	114	4.54474	2.89968	chr5	132190147	132295315	-	chr5:132190147-132295315	P4HA2	protein_coding	8974	MYP25	MIM:600608|HGNC:HGNC:8547|Ensembl:ENSG00000072682	5q31.1	prolyl 4-hydroxylase subunit alpha 2	hsa00330(Arginine and proline metabolism)//hsa01100(Metabolic pathways)	GO:0055114(oxidation-reduction process)//GO:0022900(electron transport chain)//GO:0018401(peptidyl-proline hydroxylation to 4-hydroxy-L-proline)//GO:0019511(peptidyl-proline hydroxylation)	GO:0005783(endoplasmic reticulum)//GO:0043231(intracellular membrane-bounded organelle)//GO:0005654(nucleoplasm)//GO:0005829(cytosol)//GO:0005788(endoplasmic reticulum lumen)	GO:0005515(protein binding)//GO:0016491(oxidoreductase activity)//GO:0016702(oxidoreductase activity, acting on single donors with incorporation of molecular oxygen, incorporation of two atoms of oxygen)//GO:0005506(iron ion binding)//GO:0016705(oxidoreductase activity, acting on paired donors, with incorporation or reduction of molecular oxygen)//GO:0031418(L-ascorbic acid binding)//GO:0004656(p…
ENSG00000072694	56.3724	5.81692	1.68173e-22	6.32617e-20	up	83	2	2.98348	-1.86302	chr1	161663147	161678654	+	chr1:161663147-161678654	FCGR2B	protein_coding	2213	CD32|CD32B|FCG2|FCGR2|FCGR2C|FcRII-c|IGFR2	MIM:604590|HGNC:HGNC:3618|Ensembl:ENSG00000072694	1q23.3	Fc fragment of IgG receptor IIb	hsa04145(Phagosome)//hsa04380(Osteoclast differentiation)//hsa04662(B cell receptor signaling pathway)//hsa04666(Fc gamma R-mediated phagocytosis)//hsa05150(Staphylococcus aureus infection)//hsa05152(Tuberculosis)//hsa05162(Measles)	GO:1904646(cellular response to amyloid-beta)//GO:0001818(negative regulation of cytokine production)//GO:0050766(positive regulation of phagocytosis)//GO:0043031(negative regulation of macrophage activation)//GO:0032693(negative regulation of interleukin-10 production)//GO:0050859(negative regulation of B cell receptor signaling pathway)//GO:0009617(response to bacterium)//GO:1902564(negative re…	GO:0005886(plasma membrane)//GO:0016020(membrane)//GO:0016021(integral component of membrane)//GO:0005887(integral component of plasma membrane)//GO:0043197(dendritic spine)//GO:0009897(external side of plasma membrane)//GO:0044297(cell body)	GO:0005515(protein binding)//GO:0004888(transmembrane signaling receptor activity)//GO:0001540(amyloid-beta binding)//GO:0044877(protein-containing complex binding)//GO:0019864(IgG binding)//GO:0019772(low-affinity IgG receptor activity)
ENSG00000072818	4.01494	2.00538	2.73055e-09	9.11877e-08	up	105	38	3.31708	1.3703	chr17	7336529	7351477	+	chr17:7336529-7351477	ACAP1	protein_coding	9744	CENTB1	MIM:607763|HGNC:HGNC:16467|Ensembl:ENSG00000072818	17p13.1	ArfGAP with coiled-coil, ankyrin repeat and PH domains 1	hsa04144(Endocytosis)	GO:0015031(protein transport)//GO:0043547(positive regulation of GTPase activity)	GO:0016020(membrane)//GO:0005768(endosome)//GO:0055038(recycling endosome membrane)	GO:0005515(protein binding)//GO:0005096(GTPase activator activity)//GO:0046872(metal ion binding)
ENSG00000072832	187.753	7.5527	1.3552e-06	2.08638e-05	up	19	0	0.943718	-2.77056	chr4	5748084	5893086	-	chr4:5748084-5893086	CRMP1	protein_coding	1400	CRMP-1|DPYSL1|DRP-1|DRP1|ULIP-3	MIM:602462|HGNC:HGNC:2365|Ensembl:ENSG00000072832	4p16.2	collapsin response mediator protein 1		GO:0000226(microtubule cytoskeleton organization)//GO:0007411(axon guidance)//GO:0007399(nervous system development)//GO:0006139(nucleobase-containing compound metabolic process)//GO:0010977(negative regulation of neuron projection development)//GO:0048666(neuron development)//GO:1904530(negative regulation of actin filament binding)	GO:0005737(cytoplasm)//GO:0005829(cytosol)//GO:0005856(cytoskeleton)//GO:0042995(cell projection)//GO:0005813(centrosome)//GO:0043204(perikaryon)//GO:0005815(microtubule organizing center)//GO:0005819(spindle)//GO:0030426(growth cone)//GO:0030496(midbody)//GO:0005634(nucleus)	GO:0016787(hydrolase activity)//GO:0016810(hydrolase activity, acting on carbon-nitrogen (but not peptide) bonds)//GO:0005515(protein binding)//GO:0042802(identical protein binding)//GO:0031005(filamin binding)
ENSG00000072858	3.51251	1.8125	0.000302407	0.0022012	up	34	14	1.73393	0.0635202	chr3	113532555	113629575	+	chr3:113532555-113629575	SIDT1	protein_coding	54847	SID-1|SID1	MIM:606816|HGNC:HGNC:25967|Ensembl:ENSG00000072858	3q13.2	SID1 transmembrane family member 1		GO:0050658(RNA transport)	GO:0016021(integral component of membrane)//GO:0016020(membrane)//GO:0005886(plasma membrane)//GO:0005764(lysosome)	GO:0003723(RNA binding)//GO:0015485(cholesterol binding)//GO:0003725(double-stranded RNA binding)//GO:0051033(RNA transmembrane transporter activity)
ENSG00000072954	3.04581	1.60683	1.70498e-05	0.000189795	up	65	31	2.63819	1.09492	chr19	16661139	16690023	+	chr19:16661139-16690023	TMEM38A	protein_coding	79041	TRIC-A|TRICA	MIM:611235|HGNC:HGNC:28462|Ensembl:ENSG00000072954	19p13.11	transmembrane protein 38A		GO:0015672(monovalent inorganic cation transport)//GO:0006811(ion transport)//GO:0006813(potassium ion transport)//GO:0071805(potassium ion transmembrane transport)//GO:0007029(endoplasmic reticulum organization)//GO:0010881(regulation of cardiac muscle contraction by regulation of the release of sequestered calcium ion)//GO:0014808(release of sequestered calcium ion into cytosol by sarcoplasmic …	GO:0016020(membrane)//GO:0005634(nucleus)//GO:0016021(integral component of membrane)//GO:0031965(nuclear membrane)//GO:0016529(sarcoplasmic reticulum)//GO:0033017(sarcoplasmic reticulum membrane)//GO:0070062(extracellular exosome)	GO:0005261(cation channel activity)//GO:0005267(potassium channel activity)//GO:0042802(identical protein binding)
ENSG00000073146	79.633	6.3153	0.00464266	0.0213964	up	8	0	-0.160477	-2.77056	chr22	50089879	50161690	+	chr22:50089879-50161690	MOV10L1	protein_coding	54456	CHAMP|DJ402G11.8	MIM:605794|HGNC:HGNC:7201|Ensembl:ENSG00000073146	22q13.33	Mov10 like RISC complex RNA helicase 1		GO:0007275(multicellular organism development)//GO:0007283(spermatogenesis)//GO:0007141(male meiosis I)//GO:0034587(piRNA metabolic process)//GO:0043046(DNA methylation involved in gamete generation)//GO:0007281(germ cell development)//GO:0035194(post-transcriptional gene silencing by RNA)	GO:0005737(cytoplasm)//GO:0005829(cytosol)//GO:0043186(P granule)//GO:0071546(pi-body)	GO:0003723(RNA binding)//GO:0000166(nucleotide binding)//GO:0005524(ATP binding)//GO:0016787(hydrolase activity)//GO:0003724(RNA helicase activity)//GO:0004386(helicase activity)//GO:0000287(magnesium ion binding)
ENSG00000073331	3.52924	1.81936	3.56897e-16	5.39049e-14	up	1216	502	6.83125	5.01627	chr4	112285509	112442621	+	chr4:112285509-112442621	ALPK1	protein_coding	80216	8430410J10Rik|LAK|ROSAH	MIM:607347|HGNC:HGNC:20917|Ensembl:ENSG00000073331	4q25	alpha kinase 1		GO:0006468(protein phosphorylation)//GO:0016310(phosphorylation)//GO:0002376(immune system process)//GO:0045087(innate immune response)//GO:0043123(positive regulation of I-kappaB kinase/NF-kappaB signaling)//GO:0002753(cytoplasmic pattern recognition receptor signaling pathway)	GO:0005737(cytoplasm)//GO:0005829(cytosol)	GO:0005524(ATP binding)//GO:0004674(protein serine/threonine kinase activity)//GO:0016301(kinase activity)//GO:0016740(transferase activity)//GO:0005515(protein binding)//GO:0048029(monosaccharide binding)
ENSG00000073605	5.15262	2.36531	1.52503e-19	4.00059e-17	up	354	100	5.05544	2.71461	chr17	39904595	39919854	-	chr17:39904595-39919854	GSDMB	protein_coding	55876	GSDMB-1|GSDML|PP4052|PRO2521	MIM:611221|HGNC:HGNC:23690|Ensembl:ENSG00000073605	17q21.1	gasdermin B		GO:0012501(programmed cell death)//GO:0042742(defense response to bacterium)//GO:0019835(cytolysis)//GO:0070269(pyroptosis)	GO:0005737(cytoplasm)//GO:0016020(membrane)//GO:0016021(integral component of membrane)//GO:0005886(plasma membrane)//GO:0005575(cellular_component)	GO:0005546(phosphatidylinositol-4,5-bisphosphate binding)//GO:0003674(molecular_function)//GO:0070273(phosphatidylinositol-4-phosphate binding)//GO:0001786(phosphatidylserine binding)
ENSG00000073670	6.03058	2.5923	8.9901e-11	4.41467e-09	up	75	18	2.84011	0.380416	chr17	44758988	44781846	+	chr17:44758988-44781846	ADAM11	protein_coding	4185	MDC	MIM:155120|HGNC:HGNC:189|Ensembl:ENSG00000073670	17q21.31	ADAM metallopeptidase domain 11		GO:0006508(proteolysis)//GO:0007229(integrin-mediated signaling pathway)	GO:0016020(membrane)//GO:0016021(integral component of membrane)//GO:0005886(plasma membrane)//GO:0062023(collagen-containing extracellular matrix)	GO:0008237(metallopeptidase activity)//GO:0004222(metalloendopeptidase activity)//GO:0005178(integrin binding)
ENSG00000073712	6.25619	2.64528	7.67958e-05	0.000684739	up	22	5	1.14015	-1.09718	chr14	52857268	52952435	-	chr14:52857268-52952435	FERMT2	protein_coding	10979	KIND2|MIG2|PLEKHC1|UNC112|UNC112B|mig-2	MIM:607746|HGNC:HGNC:15767|Ensembl:ENSG00000073712	14q22.1	FERM domain containing kindlin 2		GO:0007229(integrin-mediated signaling pathway)//GO:0045669(positive regulation of osteoblast differentiation)//GO:0051897(positive regulation of protein kinase B signaling)//GO:0045599(negative regulation of fat cell differentiation)//GO:0030335(positive regulation of cell migration)//GO:0007155(cell adhesion)//GO:0016055(Wnt signaling pathway)//GO:0072657(protein localization to membrane)//GO:0…	GO:0005737(cytoplasm)//GO:0005886(plasma membrane)//GO:0005634(nucleus)//GO:0016020(membrane)//GO:0005654(nucleoplasm)//GO:0005829(cytosol)//GO:0005856(cytoskeleton)//GO:0005925(focal adhesion)//GO:0030054(cell junction)//GO:0042995(cell projection)//GO:0005938(cell cortex)//GO:0009986(cell surface)//GO:0031258(lamellipodium membrane)//GO:0031234(extrinsic component of cytoplasmic side of plasma …	GO:0005515(protein binding)//GO:0008289(lipid binding)//GO:0005547(phosphatidylinositol-3,4,5-trisphosphate binding)//GO:0005178(integrin binding)//GO:0019901(protein kinase binding)//GO:0003779(actin binding)//GO:0034713(type I transforming growth factor beta receptor binding)//GO:0046332(SMAD binding)//GO:0051015(actin filament binding)
ENSG00000073754	6.82231	2.77026	1.73427e-05	0.000192625	up	24	5	1.25767	-1.09718	chr1	157830911	157898256	-	chr1:157830911-157898256	CD5L	protein_coding	922	AIM|API6|CT-2|PRO229|SP-ALPHA|Spalpha|hAIM	MIM:602592|HGNC:HGNC:1690|Ensembl:ENSG00000073754	1q23.1	CD5 molecule like		GO:0006915(apoptotic process)//GO:0002376(immune system process)//GO:0006954(inflammatory response)//GO:0006897(endocytosis)//GO:0006968(cellular defense response)//GO:0030449(regulation of complement activation)//GO:0031638(zymogen activation)//GO:1903661(positive regulation of complement-dependent cytotoxicity)	GO:0016020(membrane)//GO:0005737(cytoplasm)//GO:0005576(extracellular region)//GO:0005886(plasma membrane)//GO:0072562(blood microparticle)//GO:0005615(extracellular space)//GO:0009986(cell surface)	GO:0005044(scavenger receptor activity)//GO:0004252(serine-type endopeptidase activity)
ENSG00000073756	3.44085	1.78276	2.12569e-09	7.35763e-08	up	149	63	3.81572	2.06683	chr1	186671791	186680922	-	chr1:186671791-186680922	PTGS2	protein_coding	5743	COX-2|COX2|GRIPGHS|PGG/HS|PGHS-2|PHS-2|hCox-2	MIM:600262|HGNC:HGNC:9605|Ensembl:ENSG00000073756	1q31.1	prostaglandin-endoperoxide synthase 2	hsa00590(Arachidonic acid metabolism)//hsa01100(Metabolic pathways)//hsa04064(NF-kappa B signaling pathway)//hsa04370(VEGF signaling pathway)//hsa04625(C-type lectin receptor signaling pathway)//hsa04657(IL-17 signaling pathway)//hsa04668(TNF signaling pathway)//hsa04723(Retrograde endocannabinoid signaling)//hsa04726(Serotonergic synapse)//hsa04913(Ovarian steroidogenesis)//hsa04921(Oxytocin sig…	GO:0006954(inflammatory response)//GO:0055114(oxidation-reduction process)//GO:0008217(regulation of blood pressure)//GO:0006979(response to oxidative stress)//GO:0001516(prostaglandin biosynthetic process)//GO:0019371(cyclooxygenase pathway)//GO:0090050(positive regulation of cell migration involved in sprouting angiogenesis)//GO:0045429(positive regulation of nitric oxide biosynthetic process)/…	GO:0005634(nucleus)//GO:0005737(cytoplasm)//GO:0016020(membrane)//GO:0005783(endoplasmic reticulum)//GO:0005789(endoplasmic reticulum membrane)//GO:0031090(organelle membrane)//GO:0043231(intracellular membrane-bounded organelle)//GO:0005637(nuclear inner membrane)//GO:0005640(nuclear outer membrane)//GO:0043005(neuron projection)//GO:0005788(endoplasmic reticulum lumen)//GO:0032991(protein-conta…	GO:0020037(heme binding)//GO:0004601(peroxidase activity)//GO:0004666(prostaglandin-endoperoxide synthase activity)//GO:0046872(metal ion binding)//GO:0016491(oxidoreductase activity)//GO:0051213(dioxygenase activity)//GO:0005515(protein binding)//GO:0019899(enzyme binding)//GO:0042803(protein homodimerization activity)//GO:0016702(oxidoreductase activity, acting on single donors with incorporati…
ENSG00000074410	8.37902	3.06678	0.000143701	0.00116573	up	18	3	0.871809	-1.56032	chr15	63321378	63381846	-	chr15:63321378-63381846	CA12	protein_coding	771	CA-XII|CAXII|HsT18816|T18816	MIM:603263|HGNC:HGNC:1371|Ensembl:ENSG00000074410	15q22.2	carbonic anhydrase 12	hsa00910(Nitrogen metabolism)//hsa01100(Metabolic pathways)	GO:0006730(one-carbon metabolic process)//GO:0015701(bicarbonate transport)//GO:0055064(chloride ion homeostasis)	GO:0016021(integral component of membrane)//GO:0016020(membrane)//GO:0005886(plasma membrane)	GO:0008270(zinc ion binding)//GO:0004089(carbonate dehydratase activity)//GO:0046872(metal ion binding)//GO:0016829(lyase activity)//GO:0016836(hydro-lyase activity)
ENSG00000074803	3.21273	1.6838	1.25735e-06	1.9661e-05	up	84	38	3.00044	1.3703	chr15	48178438	48304078	+	chr15:48178438-48304078	SLC12A1	protein_coding	6557	BSC1|NKCC2	MIM:600839|HGNC:HGNC:10910|Ensembl:ENSG00000074803	15q21.1	solute carrier family 12 member 1		GO:0006811(ion transport)//GO:0055085(transmembrane transport)//GO:0006813(potassium ion transport)//GO:0006814(sodium ion transport)//GO:0035725(sodium ion transmembrane transport)//GO:0006884(cell volume homeostasis)//GO:0055064(chloride ion homeostasis)//GO:0055075(potassium ion homeostasis)//GO:1902476(chloride transmembrane transport)//GO:1990573(potassium ion import across plasma membrane)/…	GO:0016021(integral component of membrane)//GO:0016020(membrane)//GO:0005886(plasma membrane)//GO:0070062(extracellular exosome)//GO:0016324(apical plasma membrane)	GO:0022857(transmembrane transporter activity)//GO:0015377(cation:chloride symporter activity)//GO:0015293(symporter activity)//GO:0015379(potassium:chloride symporter activity)//GO:0008511(sodium:potassium:chloride symporter activity)
ENSG00000075213	2.35632	1.23654	5.00855e-06	6.5479e-05	up	178	110	4.06984	2.84918	chr7	83955777	84492724	-	chr7:83955777-84492724	SEMA3A	protein_coding	10371	COLL1|HH16|Hsema-I|Hsema-III|SEMA1|SEMAD|SEMAIII|SEMAL|SemD|coll-1	MIM:603961|HGNC:HGNC:10723|Ensembl:ENSG00000075213	7q21.11	semaphorin 3A	hsa04360(Axon guidance)	GO:0007275(multicellular organism development)//GO:0030154(cell differentiation)//GO:0007399(nervous system development)//GO:0008045(motor neuron axon guidance)//GO:0001764(neuron migration)//GO:0007411(axon guidance)//GO:0021675(nerve development)//GO:0048846(axon extension involved in axon guidance)//GO:0060385(axonogenesis involved in innervation)//GO:0061549(sympathetic ganglion development)/…	GO:0005576(extracellular region)//GO:0005615(extracellular space)//GO:0005887(integral component of plasma membrane)//GO:0030424(axon)//GO:0030425(dendrite)	GO:0005515(protein binding)//GO:0030215(semaphorin receptor binding)//GO:0045499(chemorepellent activity)//GO:0038191(neuropilin binding)
ENSG00000075290	3.66882	1.87532	0.000205848	0.00157785	up	33	13	1.69278	-0.0279156	chr10	100463009	100483744	+	chr10:100463009-100483744	WNT8B	protein_coding	7479	-	MIM:601396|HGNC:HGNC:12789|Ensembl:ENSG00000075290	10q24.31	Wnt family member 8B	hsa04150(mTOR signaling pathway)//hsa04310(Wnt signaling pathway)//hsa04390(Hippo signaling pathway)//hsa04550(Signaling pathways regulating pluripotency of stem cells)//hsa04916(Melanogenesis)//hsa04934(Cushing syndrome)//hsa05010(Alzheimer disease)//hsa05022(Pathways of neurodegeneration - multiple diseases)//hsa05165(Human papillomavirus infection)//hsa05200(Pathways in cancer)//hsa05205(Prote…	GO:0007275(multicellular organism development)//GO:0016055(Wnt signaling pathway)//GO:0030182(neuron differentiation)//GO:0071300(cellular response to retinoic acid)//GO:0007399(nervous system development)//GO:0060070(canonical Wnt signaling pathway)//GO:0007165(signal transduction)//GO:0045165(cell fate commitment)//GO:0032355(response to estradiol)//GO:1904886(beta-catenin destruction complex d…	GO:0005576(extracellular region)//GO:0005615(extracellular space)	GO:0005102(signaling receptor binding)//GO:0005125(cytokine activity)//GO:0005109(frizzled binding)//GO:0048018(receptor ligand activity)
ENSG00000075429	3.89418	1.96132	0.00281319	0.0141705	up	19	7	0.943718	-0.747149	chr17	66835117	66894751	+	chr17:66835117-66894751	CACNG5	protein_coding	27091	-	MIM:606405|HGNC:HGNC:1409|Ensembl:ENSG00000075429	17q24.2	calcium voltage-gated channel auxiliary subunit gamma 5	hsa04010(MAPK signaling pathway)//hsa04260(Cardiac muscle contraction)//hsa04261(Adrenergic signaling in cardiomyocytes)//hsa04921(Oxytocin signaling pathway)//hsa05410(Hypertrophic cardiomyopathy)//hsa05412(Arrhythmogenic right ventricular cardiomyopathy)//hsa05414(Dilated cardiomyopathy)	GO:0006816(calcium ion transport)//GO:0034220(ion transmembrane transport)//GO:0070588(calcium ion transmembrane transport)//GO:2000311(regulation of AMPA receptor activity)//GO:0061337(cardiac conduction)//GO:0098943(neurotransmitter receptor transport, postsynaptic endosome to lysosome)//GO:0019226(transmission of nerve impulse)//GO:0051968(positive regulation of synaptic transmission, glutamat…	GO:0016021(integral component of membrane)//GO:0016020(membrane)//GO:0005886(plasma membrane)//GO:0030054(cell junction)//GO:0045202(synapse)//GO:0045211(postsynaptic membrane)//GO:0014069(postsynaptic density)//GO:0098839(postsynaptic density membrane)//GO:0032281(AMPA glutamate receptor complex)//GO:0098978(glutamatergic synapse)//GO:0099055(integral component of postsynaptic membrane)	GO:0005245(voltage-gated calcium channel activity)//GO:0016247(channel regulator activity)//GO:0015075(ion transmembrane transporter activity)
ENSG00000075461	9.01296	3.172	0.0433314	0.131053	up	7	1	-0.319755	-2.24658	chr17	66964707	67033398	+	chr17:66964707-67033398	CACNG4	protein_coding	27092	-	MIM:606404|HGNC:HGNC:1408|Ensembl:ENSG00000075461	17q24.2	calcium voltage-gated channel auxiliary subunit gamma 4	hsa04010(MAPK signaling pathway)//hsa04260(Cardiac muscle contraction)//hsa04261(Adrenergic signaling in cardiomyocytes)//hsa04921(Oxytocin signaling pathway)//hsa05410(Hypertrophic cardiomyopathy)//hsa05412(Arrhythmogenic right ventricular cardiomyopathy)//hsa05414(Dilated cardiomyopathy)	GO:0006816(calcium ion transport)//GO:0070588(calcium ion transmembrane transport)//GO:0006811(ion transport)//GO:0034765(regulation of ion transmembrane transport)//GO:0019226(transmission of nerve impulse)//GO:0042220(response to cocaine)//GO:0098962(regulation of postsynaptic neurotransmitter receptor activity)//GO:2000311(regulation of AMPA receptor activity)//GO:2000969(positive regulation o…	GO:0016021(integral component of membrane)//GO:0016020(membrane)//GO:0005891(voltage-gated calcium channel complex)//GO:0005886(plasma membrane)//GO:0009986(cell surface)//GO:0014069(postsynaptic density)//GO:0032281(AMPA glutamate receptor complex)//GO:0036477(somatodendritic compartment)//GO:0044297(cell body)//GO:0098839(postsynaptic density membrane)//GO:0098978(glutamatergic synapse)//GO:009…	GO:0005245(voltage-gated calcium channel activity)//GO:0005244(voltage-gated ion channel activity)//GO:0005262(calcium channel activity)//GO:0035255(ionotropic glutamate receptor binding)//GO:0005246(calcium channel regulator activity)//GO:0016247(channel regulator activity)
ENSG00000075651	2.45053	1.29309	2.69125e-09	9.0026e-08	up	1337	795	6.96793	5.67713	chr3	171600404	171810950	-	chr3:171600404-171810950	PLD1	protein_coding	5337	CVDD	MIM:602382|HGNC:HGNC:9067|Ensembl:ENSG00000075651	3q26.31	phospholipase D1	hsa00564(Glycerophospholipid metabolism)//hsa00565(Ether lipid metabolism)//hsa01100(Metabolic pathways)//hsa04014(Ras signaling pathway)//hsa04024(cAMP signaling pathway)//hsa04071(Sphingolipid signaling pathway)//hsa04072(Phospholipase D signaling pathway)//hsa04144(Endocytosis)//hsa04666(Fc gamma R-mediated phagocytosis)//hsa04724(Glutamatergic synapse)//hsa04912(GnRH signaling pathway)//hsa04…	GO:0006654(phosphatidic acid biosynthetic process)//GO:0048017(inositol lipid-mediated signaling)//GO:0006629(lipid metabolic process)//GO:0016042(lipid catabolic process)//GO:0043312(neutrophil degranulation)//GO:0006935(chemotaxis)//GO:0007264(small GTPase mediated signal transduction)//GO:0032534(regulation of microvillus assembly)//GO:0007265(Ras protein signal transduction)//GO:0048870(cell …	GO:0005737(cytoplasm)//GO:0016020(membrane)//GO:0005783(endoplasmic reticulum)//GO:0005789(endoplasmic reticulum membrane)//GO:0005794(Golgi apparatus)//GO:0005768(endosome)//GO:0005765(lysosomal membrane)//GO:0016324(apical plasma membrane)//GO:0000139(Golgi membrane)//GO:0048471(perinuclear region of cytoplasm)//GO:0031902(late endosome membrane)//GO:0005886(plasma membrane)//GO:0035579(specifi…	GO:0003824(catalytic activity)//GO:0035091(phosphatidylinositol binding)//GO:0004630(phospholipase D activity)//GO:0016787(hydrolase activity)//GO:0005515(protein binding)//GO:0070290(N-acylphosphatidylethanolamine-specific phospholipase D activity)
ENSG00000075826	2.4835	1.31237	8.66889e-09	2.55291e-07	up	629	369	5.88197	4.57456	chr10	100486646	100519864	-	chr10:100486646-100519864	SEC31B	protein_coding	25956	SEC31B-1|SEC31L2	MIM:610258|HGNC:HGNC:23197|Ensembl:ENSG00000075826	10q24.31	SEC31 homolog B, COPII coat complex component	hsa04141(Protein processing in endoplasmic reticulum)	GO:0006888(endoplasmic reticulum to Golgi vesicle-mediated transport)//GO:0015031(protein transport)//GO:0016192(vesicle-mediated transport)//GO:0006886(intracellular protein transport)//GO:0007029(endoplasmic reticulum organization)//GO:0090110(COPII-coated vesicle cargo loading)	GO:0005737(cytoplasm)//GO:0016020(membrane)//GO:0005783(endoplasmic reticulum)//GO:0005789(endoplasmic reticulum membrane)//GO:0012507(ER to Golgi transport vesicle membrane)//GO:0031410(cytoplasmic vesicle)//GO:0000139(Golgi membrane)//GO:0070971(endoplasmic reticulum exit site)//GO:0030127(COPII vesicle coat)//GO:0030120(vesicle coat)	GO:0005515(protein binding)//GO:0005198(structural molecule activity)
ENSG00000076067	2.07175	1.05085	4.74891e-06	6.27013e-05	up	492	346	5.52856	4.4823	chr12	56521820	56596193	+	chr12:56521820-56596193	RBMS2	protein_coding	5939	SCR3	MIM:602387|HGNC:HGNC:9909|Ensembl:ENSG00000076067	12q13.3	RNA binding motif single stranded interacting protein 2		GO:0006396(RNA processing)	GO:0005634(nucleus)//GO:0005829(cytosol)//GO:1990904(ribonucleoprotein complex)	GO:0003676(nucleic acid binding)//GO:0003723(RNA binding)//GO:0003730(mRNA 3'-UTR binding)//GO:0008143(poly(A) binding)//GO:0008266(poly(U) RNA binding)
ENSG00000076258	4.03341	2.012	5.11382e-11	2.67596e-09	up	147	53	3.79643	1.82696	chr1	171314183	171342084	+	chr1:171314183-171342084	FMO4	protein_coding	2329	FMO2	MIM:136131|HGNC:HGNC:3772|Ensembl:ENSG00000076258	1q24.3	flavin containing dimethylaniline monoxygenase 4	hsa00982(Drug metabolism - cytochrome P450)	GO:0055114(oxidation-reduction process)//GO:0042737(drug catabolic process)	GO:0016020(membrane)//GO:0016021(integral component of membrane)//GO:0005783(endoplasmic reticulum)//GO:0005789(endoplasmic reticulum membrane)//GO:0031090(organelle membrane)//GO:0043231(intracellular membrane-bounded organelle)	GO:0050660(flavin adenine dinucleotide binding)//GO:0050661(NADP binding)//GO:0004499(N,N-dimethylaniline monooxygenase activity)//GO:0004497(monooxygenase activity)//GO:0016491(oxidoreductase activity)//GO:0005515(protein binding)
ENSG00000076356	21.7042	4.4399	8.35118e-06	0.000102523	up	17	1	0.796127	-2.24658	chr1	208022242	208244384	-	chr1:208022242-208244384	PLXNA2	protein_coding	5362	OCT|PLXN2	MIM:601054|HGNC:HGNC:9100|Ensembl:ENSG00000076356	1q32.2	plexin A2	hsa04360(Axon guidance)	GO:0007165(signal transduction)//GO:0071526(semaphorin-plexin signaling pathway)//GO:0030334(regulation of cell migration)//GO:0008360(regulation of cell shape)//GO:0007162(negative regulation of cell adhesion)//GO:0043087(regulation of GTPase activity)//GO:0050772(positive regulation of axonogenesis)//GO:1902287(semaphorin-plexin signaling pathway involved in axon guidance)//GO:0001756(somitogen…	GO:0016020(membrane)//GO:0016021(integral component of membrane)//GO:0005886(plasma membrane)//GO:0005887(integral component of plasma membrane)//GO:0002116(semaphorin receptor complex)	GO:0005515(protein binding)//GO:0017154(semaphorin receptor activity)//GO:0042802(identical protein binding)
ENSG00000076864	2.1049	1.07375	0.00834948	0.03492	up	42	29	2.02662	1.00551	chr1	21596215	21669363	-	chr1:21596215-21669363	RAP1GAP	protein_coding	5909	RAP1GA1|RAP1GAP1|RAP1GAPII|RAPGAP	MIM:600278|HGNC:HGNC:9858|Ensembl:ENSG00000076864	1p36.12	RAP1 GTPase activating protein	hsa04015(Rap1 signaling pathway)	GO:0051056(regulation of small GTPase mediated signal transduction)//GO:0050790(regulation of catalytic activity)//GO:0043547(positive regulation of GTPase activity)//GO:0045665(negative regulation of neuron differentiation)//GO:1904425(negative regulation of GTP binding)//GO:1904442(negative regulation of thyroid gland epithelial cell proliferation)//GO:1990792(cellular response to glial cell de…	GO:0005769(early endosome)//GO:0005829(cytosol)//GO:0016020(membrane)//GO:0030424(axon)//GO:0030425(dendrite)//GO:0043025(neuronal cell body)//GO:0005794(Golgi apparatus)//GO:0000139(Golgi membrane)//GO:0005737(cytoplasm)	GO:0005096(GTPase activator activity)//GO:0030695(GTPase regulator activity)//GO:0042803(protein homodimerization activity)//GO:0003924(GTPase activity)//GO:0005515(protein binding)//GO:0031267(small GTPase binding)
ENSG00000077063	2.89699	1.53455	0.00164801	0.00918543	up	32	16	1.65043	0.230651	chr7	117710651	117874139	-	chr7:117710651-117874139	CTTNBP2	protein_coding	83992	C7orf8|CORTBP2|Orf4	MIM:609772|HGNC:HGNC:15679|Ensembl:ENSG00000077063	7q31.31	cortactin binding protein 2		GO:0007420(brain development)//GO:0050807(regulation of synapse organization)//GO:1905274(regulation of modification of postsynaptic actin cytoskeleton)	GO:0005737(cytoplasm)//GO:0030054(cell junction)//GO:0042995(cell projection)//GO:0045202(synapse)//GO:0005938(cell cortex)//GO:0043197(dendritic spine)//GO:0008021(synaptic vesicle)//GO:0098871(postsynaptic actin cytoskeleton)//GO:0098978(glutamatergic synapse)	GO:0005515(protein binding)//GO:0017124(SH3 domain binding)
ENSG00000077080	4.25134	2.08792	0.016576	0.0609578	up	12	4	0.343487	-1.31025	chr7	100643097	100656448	-	chr7:100643097-100656448	ACTL6B	protein_coding	51412	ACTL6|BAF53B|DEE76|EIEE76|IDDSSAD|arpNalpha	MIM:612458|HGNC:HGNC:160|Ensembl:ENSG00000077080	7q22.1	actin like 6B	hsa04714(Thermogenesis)//hsa05225(Hepatocellular carcinoma)	GO:0006325(chromatin organization)//GO:0045893(positive regulation of transcription, DNA-templated)//GO:0007010(cytoskeleton organization)//GO:0007399(nervous system development)//GO:0006357(regulation of transcription by RNA polymerase II)//GO:0043044(ATP-dependent chromatin remodeling)//GO:0016358(dendrite development)//GO:0006338(chromatin remodeling)//GO:0043967(histone H4 acetylation)//GO:00…	GO:0005634(nucleus)//GO:0016514(SWI/SNF complex)//GO:0071565(nBAF complex)//GO:0035267(NuA4 histone acetyltransferase complex)	GO:0003682(chromatin binding)//GO:0003713(transcription coactivator activity)//GO:0005200(structural constituent of cytoskeleton)
ENSG00000077264	14.0894	3.81654	0.000352487	0.00248323	up	11	1	0.233025	-2.24658	chrX	110944285	111227361	+	chrX:110944285-111227361	PAK3	protein_coding	5063	ARA|MRX30|MRX47|OPHN3|PAK-3|PAK3beta|bPAK|beta-PAK	MIM:300142|HGNC:HGNC:8592|Ensembl:ENSG00000077264	Xq23	p21 (RAC1) activated kinase 3	hsa04012(ErbB signaling pathway)//hsa04014(Ras signaling pathway)//hsa04360(Axon guidance)//hsa04510(Focal adhesion)//hsa04660(T cell receptor signaling pathway)//hsa04810(Regulation of actin cytoskeleton)//hsa05130(Pathogenic Escherichia coli infection)//hsa05132(Salmonella infection)//hsa05170(Human immunodeficiency virus 1 infection)//hsa05211(Renal cell carcinoma)	GO:0006468(protein phosphorylation)//GO:0016310(phosphorylation)//GO:0000165(MAPK cascade)//GO:0007275(multicellular organism development)//GO:0008152(metabolic process)//GO:0050852(T cell receptor signaling pathway)//GO:0007165(signal transduction)//GO:0007409(axonogenesis)//GO:0002223(stimulatory C-type lectin receptor signaling pathway)//GO:0000187(activation of MAPK activity)//GO:0016358(dend…	GO:0005737(cytoplasm)//GO:0005886(plasma membrane)//GO:0005829(cytosol)//GO:0005768(endosome)//GO:0014069(postsynaptic density)//GO:0098978(glutamatergic synapse)	GO:0005524(ATP binding)//GO:0004674(protein serine/threonine kinase activity)//GO:0004672(protein kinase activity)//GO:0046872(metal ion binding)//GO:0000166(nucleotide binding)//GO:0016301(kinase activity)//GO:0016740(transferase activity)//GO:0017124(SH3 domain binding)//GO:0003824(catalytic activity)//GO:0005515(protein binding)//GO:0004708(MAP kinase kinase activity)//GO:0031267(small GTPase …
ENSG00000077274	5.23863	2.38919	0.000264517	0.00195975	up	22	6	1.14015	-0.911577	chrX	111245099	111270483	-	chrX:111245099-111270483	CAPN6	protein_coding	827	CANPX|CAPNX|CalpM|DJ914P14.1	MIM:300146|HGNC:HGNC:1483|Ensembl:ENSG00000077274	Xq23	calpain 6		GO:0006508(proteolysis)//GO:0001578(microtubule bundle formation)//GO:0051493(regulation of cytoskeleton organization)	GO:0005737(cytoplasm)//GO:0005856(cytoskeleton)//GO:0005874(microtubule)//GO:0048471(perinuclear region of cytoplasm)//GO:0005819(spindle)//GO:0005876(spindle microtubule)	GO:0004198(calcium-dependent cysteine-type endopeptidase activity)//GO:0005515(protein binding)//GO:0008017(microtubule binding)
ENSG00000077279	276.216	8.10965	7.04361e-09	2.1277e-07	up	28	0	1.46737	-2.77056	chrX	111293779	111412429	-	chrX:111293779-111412429	DCX	protein_coding	1641	DBCN|DC|LISX|SCLH|XLIS	MIM:300121|HGNC:HGNC:2714|Ensembl:ENSG00000077279	Xq23	doublecortin		GO:0035556(intracellular signal transduction)//GO:0007275(multicellular organism development)//GO:0030154(cell differentiation)//GO:0007399(nervous system development)//GO:0007417(central nervous system development)//GO:0001764(neuron migration)//GO:0035082(axoneme assembly)//GO:0042461(photoreceptor cell development)//GO:0060041(retina development in camera-type eye)//GO:0007420(brain developmen…	GO:0005737(cytoplasm)//GO:0042995(cell projection)//GO:0005874(microtubule)//GO:0043005(neuron projection)//GO:0005829(cytosol)//GO:0005930(axoneme)//GO:0005856(cytoskeleton)//GO:0005875(microtubule associated complex)	GO:0005515(protein binding)//GO:0008017(microtubule binding)//GO:0019901(protein kinase binding)
ENSG00000077935	2.50331	1.32384	1.35306e-07	2.73035e-06	up	275	160	4.69295	3.38055	chr22	45344063	45413619	-	chr22:45344063-45413619	SMC1B	protein_coding	27127	SMC1BETA|SMC1L2	MIM:608685|HGNC:HGNC:11112|Ensembl:ENSG00000077935	22q13.31	structural maintenance of chromosomes 1B	hsa04110(Cell cycle)//hsa04114(Oocyte meiosis)	GO:0051276(chromosome organization)//GO:0007064(mitotic sister chromatid cohesion)//GO:0007049(cell cycle)//GO:0051321(meiotic cell cycle)//GO:0007062(sister chromatid cohesion)	GO:0005694(chromosome)//GO:0008278(cohesin complex)//GO:0005634(nucleus)//GO:0005654(nucleoplasm)//GO:0005829(cytosol)//GO:0000775(chromosome, centromeric region)//GO:0030893(meiotic cohesin complex)//GO:0000794(condensed nuclear chromosome)//GO:0000795(synaptonemal complex)//GO:0000800(lateral element)//GO:0034991(nuclear meiotic cohesin complex)	GO:0005524(ATP binding)//GO:0005515(protein binding)//GO:0003682(chromatin binding)//GO:0046982(protein heterodimerization activity)//GO:0000166(nucleotide binding)//GO:0003677(DNA binding)
ENSG00000077942	3.67341	1.87712	0.00040416	0.00278814	up	28	11	1.46737	-0.230255	chr22	45502238	45601135	+	chr22:45502238-45601135	FBLN1	protein_coding	2192	FBLN|FIBL1	MIM:135820|HGNC:HGNC:3600|Ensembl:ENSG00000077942	22q13.31	fibulin 1		GO:0030198(extracellular matrix organization)//GO:0010952(positive regulation of peptidase activity)//GO:0007566(embryo implantation)//GO:0016032(viral process)//GO:0010628(positive regulation of gene expression)//GO:0001933(negative regulation of protein phosphorylation)//GO:0007162(negative regulation of cell adhesion)//GO:0070373(negative regulation of ERK1 and ERK2 cascade)//GO:1900025(negati…	GO:0005576(extracellular region)//GO:0062023(collagen-containing extracellular matrix)//GO:0005604(basement membrane)//GO:0005615(extracellular space)//GO:0070062(extracellular exosome)//GO:0031012(extracellular matrix)//GO:0071953(elastic fiber)	GO:0005515(protein binding)//GO:0005509(calcium ion binding)//GO:0016504(peptidase activator activity)//GO:0042802(identical protein binding)//GO:0001968(fibronectin binding)//GO:0008022(protein C-terminus binding)//GO:0005178(integrin binding)//GO:0005201(extracellular matrix structural constituent)//GO:0044877(protein-containing complex binding)//GO:0070051(fibrinogen binding)
ENSG00000077943	79.633	6.3153	0.00464266	0.0213964	up	8	0	-0.160477	-2.77056	chr10	15513954	15719922	-	chr10:15513954-15719922	ITGA8	protein_coding	8516	-	MIM:604063|HGNC:HGNC:6144|Ensembl:ENSG00000077943	10p13	integrin subunit alpha 8	hsa04151(PI3K-Akt signaling pathway)//hsa04510(Focal adhesion)//hsa04512(ECM-receptor interaction)//hsa04514(Cell adhesion molecules)//hsa04810(Regulation of actin cytoskeleton)//hsa05165(Human papillomavirus infection)//hsa05410(Hypertrophic cardiomyopathy)//hsa05412(Arrhythmogenic right ventricular cardiomyopathy)//hsa05414(Dilated cardiomyopathy)	GO:0007155(cell adhesion)//GO:0007275(multicellular organism development)//GO:0030154(cell differentiation)//GO:0007399(nervous system development)//GO:0001822(kidney development)//GO:0007229(integrin-mediated signaling pathway)//GO:0030198(extracellular matrix organization)//GO:0007160(cell-matrix adhesion)//GO:0098609(cell-cell adhesion)//GO:0034446(substrate adhesion-dependent cell spreading)/…	GO:0008305(integrin complex)//GO:0016020(membrane)//GO:0016021(integral component of membrane)//GO:0005783(endoplasmic reticulum)//GO:0005886(plasma membrane)//GO:0005925(focal adhesion)//GO:0009986(cell surface)//GO:0034678(integrin alpha8-beta1 complex)//GO:0014069(postsynaptic density)//GO:0032591(dendritic spine membrane)//GO:0043204(perikaryon)	GO:0046872(metal ion binding)
ENSG00000077984	5.24493	2.39092	2.48709e-13	2.15588e-11	up	130	36	3.62111	1.29683	chr20	24949269	24959928	+	chr20:24949269-24959928	CST7	protein_coding	8530	CMAP	MIM:603253|HGNC:HGNC:2479|Ensembl:ENSG00000077984	20p11.21	cystatin F		GO:0006955(immune response)//GO:0010466(negative regulation of peptidase activity)//GO:0031643(positive regulation of myelination)//GO:0097340(inhibition of cysteine-type endopeptidase activity)//GO:1903979(negative regulation of microglial cell activation)	GO:0005737(cytoplasm)//GO:0005576(extracellular region)//GO:0005615(extracellular space)//GO:0005794(Golgi apparatus)//GO:0005783(endoplasmic reticulum)//GO:0005764(lysosome)//GO:0005768(endosome)//GO:0005770(late endosome)//GO:0005771(multivesicular body)//GO:0031410(cytoplasmic vesicle)	GO:0004869(cysteine-type endopeptidase inhibitor activity)//GO:0005515(protein binding)//GO:0030414(peptidase inhibitor activity)//GO:0042803(protein homodimerization activity)//GO:0004866(endopeptidase inhibitor activity)
ENSG00000078018	2.22797	1.15573	0.0370978	0.116219	up	20	13	1.01221	-0.0279156	chr2	209424047	209734118	+	chr2:209424047-209734118	MAP2	protein_coding	4133	MAP-2|MAP2A|MAP2B|MAP2C	MIM:157130|HGNC:HGNC:6839|Ensembl:ENSG00000078018	2q34	microtubule associated protein 2		GO:0001578(microtubule bundle formation)//GO:0021954(central nervous system neuron development)//GO:0000226(microtubule cytoskeleton organization)//GO:0031175(neuron projection development)//GO:1903827(regulation of cellular protein localization)//GO:0031113(regulation of microtubule polymerization)//GO:0016358(dendrite development)//GO:0030517(negative regulation of axon extension)//GO:0031115(n…	GO:0005737(cytoplasm)//GO:0043025(neuronal cell body)//GO:0005856(cytoskeleton)//GO:0042995(cell projection)//GO:0030425(dendrite)//GO:0005874(microtubule)//GO:0043005(neuron projection)//GO:0005875(microtubule associated complex)//GO:0005829(cytosol)//GO:0043194(axon initial segment)//GO:0044294(dendritic growth cone)//GO:0032839(dendrite cytoplasm)//GO:0043198(dendritic shaft)//GO:0043203(axon …	GO:0015631(tubulin binding)//GO:0008017(microtubule binding)//GO:0005515(protein binding)//GO:0005516(calmodulin binding)//GO:0002162(dystroglycan binding)//GO:0048156(tau protein binding)//GO:0005198(structural molecule activity)
ENSG00000078114	7.95436	2.99175	2.50778e-25	1.31573e-22	up	290	53	4.76914	1.82696	chr10	20779973	21293011	-	chr10:20779973-21293011	NEBL	protein_coding	10529	C10orf113|LASP2|LNEBL|bA165O3.1	MIM:605491|HGNC:HGNC:16932|Ensembl:ENSG00000078114	10p12.31	nebulette		GO:0048747(muscle fiber development)//GO:0071691(cardiac muscle thin filament assembly)	GO:0005737(cytoplasm)//GO:0030018(Z disc)//GO:0070062(extracellular exosome)//GO:0001725(stress fiber)//GO:0031674(I band)	GO:0005515(protein binding)//GO:0003779(actin binding)//GO:0051015(actin filament binding)//GO:0008092(cytoskeletal protein binding)//GO:0008307(structural constituent of muscle)//GO:0005523(tropomyosin binding)//GO:0031005(filamin binding)
ENSG00000078124	2.0363	1.02595	2.07279e-06	3.0431e-05	up	1206	863	6.81935	5.79521	chr11	76860859	77026797	+	chr11:76860859-77026797	ACER3	protein_coding	55331	APHC|PHCA|PLDECO	MIM:617036|HGNC:HGNC:16066|Ensembl:ENSG00000078124	11q13.5	alkaline ceramidase 3	hsa00600(Sphingolipid metabolism)//hsa01100(Metabolic pathways)	GO:0006672(ceramide metabolic process)//GO:0006954(inflammatory response)//GO:0046512(sphingosine biosynthetic process)//GO:0046514(ceramide catabolic process)//GO:0006629(lipid metabolic process)//GO:0006665(sphingolipid metabolic process)//GO:0008284(positive regulation of cell population proliferation)//GO:0030148(sphingolipid biosynthetic process)//GO:0042552(myelination)//GO:0043067(regulati…	GO:0016021(integral component of membrane)//GO:0016020(membrane)//GO:0005783(endoplasmic reticulum)//GO:0005789(endoplasmic reticulum membrane)//GO:0005794(Golgi apparatus)//GO:0000139(Golgi membrane)//GO:0030176(integral component of endoplasmic reticulum membrane)//GO:0030173(integral component of Golgi membrane)	GO:0016811(hydrolase activity, acting on carbon-nitrogen (but not peptide) bonds, in linear amides)//GO:0070774(phytoceramidase activity)//GO:0016787(hydrolase activity)//GO:0017040(N-acylsphingosine amidohydrolase activity)//GO:0102121(ceramidase activity)//GO:0046872(metal ion binding)//GO:0008270(zinc ion binding)//GO:0005509(calcium ion binding)//GO:0071633(dihydroceramidase activity)
ENSG00000078328	99.2913	6.6336	0.00126829	0.00735485	up	10	0	0.1134	-2.77056	chr16	5239802	7713340	+	chr16:5239802-7713340	RBFOX1	protein_coding	54715	2BP1|A2BP1|FOX-1|FOX1|HRNBP1	MIM:605104|HGNC:HGNC:18222|Ensembl:ENSG00000078328	16p13.3	RNA binding fox-1 homolog 1		GO:0006397(mRNA processing)//GO:0008380(RNA splicing)//GO:0000381(regulation of alternative mRNA splicing, via spliceosome)//GO:0050885(neuromuscular process controlling balance)//GO:2001014(regulation of skeletal muscle cell differentiation)//GO:0043484(regulation of RNA splicing)//GO:0007399(nervous system development)//GO:0050658(RNA transport)	GO:0005634(nucleus)//GO:0005737(cytoplasm)//GO:0005802(trans-Golgi network)//GO:0010494(cytoplasmic stress granule)//GO:0097165(nuclear stress granule)	GO:0003723(RNA binding)//GO:0003676(nucleic acid binding)//GO:0003730(mRNA 3'-UTR binding)//GO:0005515(protein binding)//GO:0003729(mRNA binding)//GO:0008022(protein C-terminus binding)
ENSG00000078487	2.37112	1.24557	4.366e-06	5.80686e-05	up	184	113	4.11726	2.88722	chr7	100400826	100428992	-	chr7:100400826-100428992	ZCWPW1	protein_coding	55063	ZCW1	MIM:618900|HGNC:HGNC:23486|Ensembl:ENSG00000078487	7q22.1	zinc finger CW-type and PWWP domain containing 1		GO:0030154(cell differentiation)//GO:0007283(spermatogenesis)//GO:2000781(positive regulation of double-strand break repair)//GO:0007129(homologous chromosome pairing at meiosis)//GO:0007127(meiosis I)//GO:0045911(positive regulation of DNA recombination)	GO:0005634(nucleus)//GO:0005694(chromosome)	GO:0008270(zinc ion binding)//GO:0046872(metal ion binding)//GO:0035064(methylated histone binding)//GO:0008327(methyl-CpG binding)//GO:0005515(protein binding)
ENSG00000078549	21.7042	4.4399	8.35118e-06	0.000102523	up	17	1	0.796127	-2.24658	chr7	31052308	31111479	+	chr7:31052308-31111479	ADCYAP1R1	protein_coding	117	PAC1|PAC1R|PACAPR|PACAPRI	MIM:102981|HGNC:HGNC:242|Ensembl:ENSG00000078549	7p14.3	ADCYAP receptor type I	hsa04024(cAMP signaling pathway)//hsa04080(Neuroactive ligand-receptor interaction)//hsa04713(Circadian entrainment)//hsa04911(Insulin secretion)//hsa04924(Renin secretion)	GO:0007186(G protein-coupled receptor signaling pathway)//GO:0007166(cell surface receptor signaling pathway)//GO:0007165(signal transduction)//GO:0007275(multicellular organism development)//GO:0030154(cell differentiation)//GO:0007283(spermatogenesis)//GO:0007188(adenylate cyclase-modulating G protein-coupled receptor signaling pathway)//GO:0007202(activation of phospholipase C activity)//GO:00…	GO:0016021(integral component of membrane)//GO:0016020(membrane)//GO:0043231(intracellular membrane-bounded organelle)//GO:0005886(plasma membrane)//GO:0043005(neuron projection)//GO:0005887(integral component of plasma membrane)//GO:0043235(receptor complex)//GO:0005737(cytoplasm)//GO:0005768(endosome)//GO:0005791(rough endoplasmic reticulum)//GO:0005901(caveola)//GO:0005923(bicellular tight jun…	GO:0004930(G protein-coupled receptor activity)//GO:0004999(vasoactive intestinal polypeptide receptor activity)//GO:0004888(transmembrane signaling receptor activity)//GO:0005515(protein binding)//GO:0038023(signaling receptor activity)//GO:0008528(G protein-coupled peptide receptor activity)//GO:0017046(peptide hormone binding)//GO:0008179(adenylate cyclase binding)//GO:0042923(neuropeptide bin…
ENSG00000078596	5.02588	2.32938	9.82733e-05	0.000847071	up	28	8	1.46737	-0.599558	chrX	79360384	79367667	-	chrX:79360384-79367667	ITM2A	protein_coding	9452	BRICD2A|E25A	MIM:300222|HGNC:HGNC:6173|Ensembl:ENSG00000078596	Xq21.1	integral membrane protein 2A		GO:0002317(plasma cell differentiation)//GO:0042985(negative regulation of amyloid precursor protein biosynthetic process)	GO:0016020(membrane)//GO:0016021(integral component of membrane)//GO:0005886(plasma membrane)//GO:0005794(Golgi apparatus)	GO:0005515(protein binding)//GO:0001540(amyloid-beta binding)
ENSG00000079112	3.01982	1.59446	0.00778622	0.0328537	up	23	11	1.20011	-0.230255	chr8	94127162	94217303	-	chr8:94127162-94217303	CDH17	protein_coding	1015	CDH16|HPT-1|HPT1	MIM:603017|HGNC:HGNC:1756|Ensembl:ENSG00000079112	8q22.1	cadherin 17	hsa05226(Gastric cancer)	GO:0007156(homophilic cell adhesion via plasma membrane adhesion molecules)//GO:0007155(cell adhesion)//GO:0098609(cell-cell adhesion)//GO:0007229(integrin-mediated signaling pathway)//GO:0034332(adherens junction organization)//GO:0098742(cell-cell adhesion via plasma-membrane adhesion molecules)//GO:0016339(calcium-dependent cell-cell adhesion via plasma membrane cell adhesion molecules)//GO:00…	GO:0005886(plasma membrane)//GO:0016020(membrane)//GO:0016021(integral component of membrane)//GO:0005654(nucleoplasm)//GO:0030054(cell junction)//GO:0016323(basolateral plasma membrane)//GO:0016342(catenin complex)//GO:0009986(cell surface)	GO:0005509(calcium ion binding)//GO:0046872(metal ion binding)//GO:0005515(protein binding)//GO:0045296(cadherin binding)//GO:0005178(integrin binding)//GO:0005215(transporter activity)//GO:0005427(proton-dependent oligopeptide secondary active transmembrane transporter activity)
ENSG00000079156	2.53884	1.34417	0.00432459	0.0203404	up	35	20	1.77393	0.516085	chr2	178194481	178402893	+	chr2:178194481-178402893	OSBPL6	protein_coding	114880	ORP6	MIM:606734|HGNC:HGNC:16388|Ensembl:ENSG00000079156	2q31.2	oxysterol binding protein like 6		GO:0006869(lipid transport)//GO:0015918(sterol transport)//GO:0006699(bile acid biosynthetic process)//GO:0032374(regulation of cholesterol transport)	GO:0005634(nucleus)//GO:0005737(cytoplasm)//GO:0016020(membrane)//GO:0005783(endoplasmic reticulum)//GO:0005789(endoplasmic reticulum membrane)//GO:0005886(plasma membrane)//GO:0005768(endosome)//GO:0005829(cytosol)//GO:0010008(endosome membrane)//GO:0031901(early endosome membrane)//GO:0043231(intracellular membrane-bounded organelle)//GO:0005635(nuclear envelope)//GO:0031965(nuclear membrane)//…	GO:0005515(protein binding)//GO:0008289(lipid binding)//GO:0015485(cholesterol binding)//GO:0015248(sterol transporter activity)//GO:0032934(sterol binding)
ENSG00000079215	2.26659	1.18052	7.67567e-08	1.69676e-06	up	980	630	6.5204	5.34261	chr5	36596588	36688334	+	chr5:36596588-36688334	SLC1A3	protein_coding	6507	EA6|EAAT1|GLAST|GLAST1	MIM:600111|HGNC:HGNC:10941|Ensembl:ENSG00000079215	5p13.2	solute carrier family 1 member 3	hsa04721(Synaptic vesicle cycle)//hsa04724(Glutamatergic synapse)//hsa05016(Huntington disease)	GO:0055085(transmembrane transport)//GO:0007605(sensory perception of sound)//GO:0009611(response to wounding)//GO:0046677(response to antibiotic)//GO:0042493(response to drug)//GO:0070779(D-aspartate import across plasma membrane)//GO:0006883(cellular sodium ion homeostasis)//GO:0050885(neuromuscular process controlling balance)//GO:0009416(response to light stimulus)//GO:0009449(gamma-aminobuty…	GO:0016021(integral component of membrane)//GO:0016020(membrane)//GO:0005887(integral component of plasma membrane)//GO:0005886(plasma membrane)//GO:0009986(cell surface)//GO:0043025(neuronal cell body)//GO:0071944(cell periphery)//GO:0043005(neuron projection)//GO:0042995(cell projection)//GO:0045202(synapse)//GO:0009925(basal plasma membrane)//GO:0031410(cytoplasmic vesicle)//GO:0048471(perinuc…	GO:0015293(symporter activity)//GO:0005314(high-affinity glutamate transmembrane transporter activity)//GO:0015172(acidic amino acid transmembrane transporter activity)//GO:0016595(glutamate binding)//GO:0016597(amino acid binding)//GO:0046872(metal ion binding)//GO:0005515(protein binding)//GO:0005313(L-glutamate transmembrane transporter activity)//GO:0015501(glutamate:sodium symporter activity)
ENSG00000079263	3.15412	1.65724	6.4413e-05	0.000591798	up	50	23	2.26984	0.698305	chr2	230203110	230313215	+	chr2:230203110-230313215	SP140	protein_coding	11262	LYSP100|LYSP100-A|LYSP100-B	MIM:608602|HGNC:HGNC:17133|Ensembl:ENSG00000079263	2q37.1	SP140 nuclear body protein		GO:0006357(regulation of transcription by RNA polymerase II)//GO:0006952(defense response)	GO:0005634(nucleus)//GO:0016604(nuclear body)//GO:0005737(cytoplasm)//GO:0001650(fibrillar center)//GO:0005739(mitochondrion)//GO:0016605(PML body)	GO:0003677(DNA binding)//GO:0005515(protein binding)//GO:0046872(metal ion binding)//GO:0000981(DNA-binding transcription factor activity, RNA polymerase II-specific)
ENSG00000079337	4.12965	2.04602	7.72214e-09	2.31166e-07	up	91	32	3.11389	1.13762	chr12	47734363	47771040	-	chr12:47734363-47771040	RAPGEF3	protein_coding	10411	CAMP-GEFI|EPAC|EPAC1|HSU79275|bcm910	MIM:606057|HGNC:HGNC:16629|Ensembl:ENSG00000079337	12q13.11	Rap guanine nucleotide exchange factor 3	hsa04015(Rap1 signaling pathway)//hsa04024(cAMP signaling pathway)//hsa04072(Phospholipase D signaling pathway)//hsa04261(Adrenergic signaling in cardiomyocytes)//hsa04670(Leukocyte transendothelial migration)//hsa04720(Long-term potentiation)//hsa04726(Serotonergic synapse)	GO:0035556(intracellular signal transduction)//GO:0007264(small GTPase mediated signal transduction)//GO:0001525(angiogenesis)//GO:0043547(positive regulation of GTPase activity)//GO:0033138(positive regulation of peptidyl-serine phosphorylation)//GO:0007165(signal transduction)//GO:1901985(positive regulation of protein acetylation)//GO:0061028(establishment of endothelial barrier)//GO:0071320(c…	GO:0016020(membrane)//GO:0005886(plasma membrane)//GO:0030175(filopodium)//GO:0012505(endomembrane system)//GO:0030027(lamellipodium)//GO:0005902(microvillus)//GO:0070062(extracellular exosome)//GO:0030864(cortical actin cytoskeleton)	GO:0005085(guanyl-nucleotide exchange factor activity)//GO:0000166(nucleotide binding)//GO:0005515(protein binding)//GO:0030552(cAMP binding)//GO:0019904(protein domain specific binding)
ENSG00000079385	8.69186	3.11966	3.2778e-18	7.26104e-16	up	132	22	3.64288	0.640085	chr19	42507304	42561234	-	chr19:42507304-42561234	CEACAM1	protein_coding	634	BGP|BGP1|BGPI	MIM:109770|HGNC:HGNC:1814|Ensembl:ENSG00000079385	19q13.2	CEA cell adhesion molecule 1		GO:0007155(cell adhesion)//GO:0007229(integrin-mediated signaling pathway)//GO:0001525(angiogenesis)//GO:0050900(leukocyte migration)//GO:0016477(cell migration)//GO:0043312(neutrophil degranulation)//GO:0001558(regulation of cell growth)//GO:0030334(regulation of cell migration)//GO:0043116(negative regulation of vascular permeability)//GO:0032869(cellular response to insulin stimulus)//GO:00071…	GO:0016020(membrane)//GO:0016021(integral component of membrane)//GO:0005886(plasma membrane)//GO:0005576(extracellular region)//GO:0031410(cytoplasmic vesicle)//GO:0005912(adherens junction)//GO:0030054(cell junction)//GO:0016324(apical plasma membrane)//GO:0042995(cell projection)//GO:0009986(cell surface)//GO:0016328(lateral plasma membrane)//GO:0042101(T cell receptor complex)//GO:0005887(int…	GO:0003779(actin binding)//GO:0042803(protein homodimerization activity)//GO:0005515(protein binding)//GO:0042802(identical protein binding)//GO:0046983(protein dimerization activity)//GO:0005516(calmodulin binding)//GO:0003674(molecular_function)//GO:0019903(protein phosphatase binding)//GO:0019900(kinase binding)//GO:1990782(protein tyrosine kinase binding)//GO:0031005(filamin binding)//GO:0015…
ENSG00000079931	2.68349	1.42411	0.00241842	0.0125332	up	37	20	1.85075	0.516085	chr6	132296055	132401475	-	chr6:132296055-132401475	MOXD1	protein_coding	26002	MOX|PRO5780|dJ248E1.1	MIM:609000|HGNC:HGNC:21063|Ensembl:ENSG00000079931	6q23.2	monooxygenase DBH like 1		GO:0055114(oxidation-reduction process)//GO:0006589(octopamine biosynthetic process)//GO:0042420(dopamine catabolic process)//GO:0042421(norepinephrine biosynthetic process)	GO:0016020(membrane)//GO:0016021(integral component of membrane)//GO:0005783(endoplasmic reticulum)//GO:0005789(endoplasmic reticulum membrane)//GO:0005615(extracellular space)//GO:0030667(secretory granule membrane)	GO:0003824(catalytic activity)//GO:0005507(copper ion binding)//GO:0004497(monooxygenase activity)//GO:0016715(oxidoreductase activity, acting on paired donors, with incorporation or reduction of molecular oxygen, reduced ascorbate as one donor, and incorporation of one atom of oxygen)//GO:0004500(dopamine beta-monooxygenase activity)//GO:0046872(metal ion binding)//GO:0016491(oxidoreductase acti…
ENSG00000079950	2.06463	1.04588	2.06445e-06	3.03308e-05	up	853	602	6.32051	5.27726	chr6	132445867	132513198	-	chr6:132445867-132513198	STX7	protein_coding	8417	-	MIM:603217|HGNC:HGNC:11442|Ensembl:ENSG00000079950	6q23.2	syntaxin 7	hsa04130(SNARE interactions in vesicular transport)//hsa04145(Phagosome)	GO:0006886(intracellular protein transport)//GO:0016192(vesicle-mediated transport)//GO:0006906(vesicle fusion)//GO:0048278(vesicle docking)//GO:0001916(positive regulation of T cell mediated cytotoxicity)//GO:0051640(organelle localization)//GO:0070925(organelle assembly)//GO:1902685(positive regulation of receptor localization to synapse)//GO:1903076(regulation of protein localization to plasma…	GO:0016020(membrane)//GO:0016021(integral component of membrane)//GO:0005886(plasma membrane)//GO:0005768(endosome)//GO:0005770(late endosome)//GO:0005765(lysosomal membrane)//GO:0005764(lysosome)//GO:0048471(perinuclear region of cytoplasm)//GO:0005769(early endosome)//GO:0055037(recycling endosome)//GO:0031901(early endosome membrane)//GO:0070062(extracellular exosome)//GO:0012505(endomembrane …	GO:0005484(SNAP receptor activity)//GO:0005515(protein binding)//GO:0019905(syntaxin binding)//GO:0000149(SNARE binding)//GO:0019869(chloride channel inhibitor activity)
ENSG00000080031	8.76073	3.13105	2.24181e-16	3.41183e-14	up	109	18	3.37024	0.380416	chr19	55181247	55209506	-	chr19:55181247-55209506	PTPRH	protein_coding	5794	R-PTP-H|SAP1	MIM:602510|HGNC:HGNC:9672|Ensembl:ENSG00000080031	19q13.42	protein tyrosine phosphatase receptor type H		GO:0006470(protein dephosphorylation)//GO:0016311(dephosphorylation)//GO:0006915(apoptotic process)//GO:0035335(peptidyl-tyrosine dephosphorylation)	GO:0005737(cytoplasm)//GO:0016020(membrane)//GO:0016021(integral component of membrane)//GO:0005886(plasma membrane)//GO:0016324(apical plasma membrane)//GO:0042995(cell projection)//GO:0031528(microvillus membrane)//GO:0005887(integral component of plasma membrane)	GO:0005515(protein binding)//GO:0016791(phosphatase activity)//GO:0004725(protein tyrosine phosphatase activity)//GO:0005001(transmembrane receptor protein tyrosine phosphatase activity)//GO:0016787(hydrolase activity)//GO:0004721(phosphoprotein phosphatase activity)//GO:0045296(cadherin binding)
ENSG00000080166	50.1457	5.64805	0.0336166	0.10732	up	5	0	-0.703312	-2.77056	chr13	94436811	94479682	-	chr13:94436811-94479682	DCT	protein_coding	1638	OCA8|TRP-2|TYRP2	MIM:191275|HGNC:HGNC:2709|Ensembl:ENSG00000080166	13q32.1	dopachrome tautomerase	hsa00350(Tyrosine metabolism)//hsa01100(Metabolic pathways)//hsa04916(Melanogenesis)	GO:0055114(oxidation-reduction process)//GO:0042438(melanin biosynthetic process)//GO:0008544(epidermis development)//GO:0006583(melanin biosynthetic process from tyrosine)//GO:0009637(response to blue light)//GO:0002052(positive regulation of neuroblast proliferation)//GO:0021847(ventricular zone neuroblast division)//GO:0048066(developmental pigmentation)//GO:0043473(pigmentation)//GO:0048468(c…	GO:0016020(membrane)//GO:0016021(integral component of membrane)//GO:0043231(intracellular membrane-bounded organelle)//GO:0005886(plasma membrane)//GO:0005829(cytosol)//GO:0042470(melanosome)//GO:0033162(melanosome membrane)//GO:0005737(cytoplasm)	GO:0016491(oxidoreductase activity)//GO:0046872(metal ion binding)//GO:0016853(isomerase activity)//GO:0005515(protein binding)//GO:0004167(dopachrome isomerase activity)//GO:0005507(copper ion binding)
ENSG00000080293	10.2821	3.36206	0.0246349	0.0836675	up	8	1	-0.160477	-2.24658	chr2	119439843	119525301	-	chr2:119439843-119525301	SCTR	protein_coding	6344	SR	MIM:182098|HGNC:HGNC:10608|Ensembl:ENSG00000080293	2q14.2	secretin receptor	hsa04080(Neuroactive ligand-receptor interaction)//hsa04972(Pancreatic secretion)//hsa04976(Bile secretion)	GO:0007186(G protein-coupled receptor signaling pathway)//GO:0007166(cell surface receptor signaling pathway)//GO:0007165(signal transduction)//GO:0007188(adenylate cyclase-modulating G protein-coupled receptor signaling pathway)//GO:0007420(brain development)//GO:0048167(regulation of synaptic plasticity)//GO:0032098(regulation of appetite)//GO:0002024(diet induced thermogenesis)//GO:0009992(cel…	GO:0016021(integral component of membrane)//GO:0016020(membrane)//GO:0005886(plasma membrane)//GO:0005881(cytoplasmic microtubule)	GO:0004930(G protein-coupled receptor activity)//GO:0004888(transmembrane signaling receptor activity)//GO:0008528(G protein-coupled peptide receptor activity)//GO:0017046(peptide hormone binding)//GO:0015055(secretin receptor activity)
ENSG00000080493	2.21633	1.14817	0.0014179	0.00806983	up	64	42	2.61636	1.50688	chr4	71062667	71572087	+	chr4:71062667-71572087	SLC4A4	protein_coding	8671	HNBC1|KNBC|NBC1|NBC2|NBCe1-A|SLC4A5|hhNMC|kNBC1|pNBC	MIM:603345|HGNC:HGNC:11030|Ensembl:ENSG00000080493	4q13.3	solute carrier family 4 member 4	hsa04964(Proximal tubule bicarbonate reclamation)//hsa04972(Pancreatic secretion)//hsa04976(Bile secretion)	GO:0006820(anion transport)//GO:0006811(ion transport)//GO:0015698(inorganic anion transport)//GO:0006814(sodium ion transport)//GO:0098656(anion transmembrane transport)//GO:0055085(transmembrane transport)//GO:0150104(transport across blood-brain barrier)//GO:0015701(bicarbonate transport)//GO:0035725(sodium ion transmembrane transport)//GO:0051453(regulation of intracellular pH)//GO:0045821(po…	GO:0016021(integral component of membrane)//GO:0016020(membrane)//GO:0005886(plasma membrane)//GO:0016323(basolateral plasma membrane)//GO:0070062(extracellular exosome)//GO:0005887(integral component of plasma membrane)//GO:0009986(cell surface)//GO:0044214(spanning component of plasma membrane)	GO:0005452(inorganic anion exchanger activity)//GO:0008509(anion transmembrane transporter activity)//GO:0015293(symporter activity)//GO:0005515(protein binding)//GO:0042802(identical protein binding)//GO:0022857(transmembrane transporter activity)//GO:0008510(sodium:bicarbonate symporter activity)
ENSG00000080561	3.22106	1.68754	4.08252e-09	1.29196e-07	up	166	75	3.97005	2.31027	chrX	107825755	107931637	+	chrX:107825755-107931637	MID2	protein_coding	11043	FXY2|MRX101|RNF60|TRIM1	MIM:300204|HGNC:HGNC:7096|Ensembl:ENSG00000080561	Xq22.3	midline 2		GO:0016567(protein ubiquitination)//GO:0045893(positive regulation of transcription, DNA-templated)//GO:0045087(innate immune response)//GO:0010508(positive regulation of autophagy)//GO:0043123(positive regulation of I-kappaB kinase/NF-kappaB signaling)//GO:0051092(positive regulation of NF-kappaB transcription factor activity)//GO:0046597(negative regulation of viral entry into host cell)//GO:00…	GO:0005737(cytoplasm)//GO:0005856(cytoskeleton)//GO:0005874(microtubule)//GO:0070062(extracellular exosome)	GO:0008270(zinc ion binding)//GO:0046872(metal ion binding)//GO:0005515(protein binding)//GO:0016740(transferase activity)//GO:0042803(protein homodimerization activity)//GO:0008017(microtubule binding)//GO:0019899(enzyme binding)//GO:0003713(transcription coactivator activity)//GO:0051219(phosphoprotein binding)//GO:0042802(identical protein binding)
ENSG00000080854	109.12	6.76978	0.000352487	0.00248323	up	11	0	0.233025	-2.77056	chr11	133896438	133956968	-	chr11:133896438-133956968	IGSF9B	protein_coding	22997	LINC00947|MIR4697HG	MIM:613773|HGNC:HGNC:32326|Ensembl:ENSG00000080854	11q25	immunoglobulin superfamily member 9B		GO:0007155(cell adhesion)//GO:0007399(nervous system development)	GO:0016020(membrane)//GO:0016021(integral component of membrane)//GO:0005886(plasma membrane)//GO:0030054(cell junction)//GO:0045202(synapse)//GO:0045211(postsynaptic membrane)//GO:0014069(postsynaptic density)//GO:0043005(neuron projection)//GO:0098982(GABA-ergic synapse)//GO:0099629(postsynaptic specialization of symmetric synapse)	GO:0005515(protein binding)
ENSG00000081237	2.00976	1.00702	1.21954e-06	1.92054e-05	up	9356	6784	9.77338	8.76659	chr1	198638457	198757476	+	chr1:198638457-198757476	PTPRC	protein_coding	5788	B220|CD45|CD45R|GP180|L-CA|LCA|LY5|T200	MIM:151460|HGNC:HGNC:9666|Ensembl:ENSG00000081237	1q31.3-q32.1	protein tyrosine phosphatase receptor type C	hsa04514(Cell adhesion molecules)//hsa04660(T cell receptor signaling pathway)//hsa04666(Fc gamma R-mediated phagocytosis)//hsa05132(Salmonella infection)//hsa05340(Primary immunodeficiency)	GO:0050852(T cell receptor signaling pathway)//GO:0035335(peptidyl-tyrosine dephosphorylation)//GO:0032703(negative regulation of interleukin-2 production)//GO:0043410(positive regulation of MAPK cascade)//GO:1903979(negative regulation of microglial cell activation)//GO:0032760(positive regulation of tumor necrosis factor production)//GO:0006470(protein dephosphorylation)//GO:0016311(dephosphory…	GO:0005886(plasma membrane)//GO:0016020(membrane)//GO:0016021(integral component of membrane)//GO:0005925(focal adhesion)//GO:0045121(membrane raft)//GO:0009986(cell surface)//GO:0005887(integral component of plasma membrane)//GO:0070062(extracellular exosome)//GO:0030667(secretory granule membrane)//GO:0009897(external side of plasma membrane)//GO:0009898(cytoplasmic side of plasma membrane)//GO…	GO:0004725(protein tyrosine phosphatase activity)//GO:0005515(protein binding)//GO:0016787(hydrolase activity)//GO:0004721(phosphoprotein phosphatase activity)//GO:0016791(phosphatase activity)//GO:0019901(protein kinase binding)//GO:0005102(signaling receptor binding)//GO:0005001(transmembrane receptor protein tyrosine phosphatase activity)//GO:0030506(ankyrin binding)//GO:0030507(spectrin bindi…
ENSG00000081665	2.44815	1.29169	6.98742e-09	2.11715e-07	up	825	491	6.27245	4.98445	chr19	19785839	19821751	-	chr19:19785839-19821751	ZNF506	protein_coding	440515	-	HGNC:HGNC:23780|Ensembl:ENSG00000081665	19p13.11	zinc finger protein 506	hsa05168(Herpes simplex virus 1 infection)	GO:0006355(regulation of transcription, DNA-templated)//GO:0006357(regulation of transcription by RNA polymerase II)	GO:0005634(nucleus)//GO:0000785(chromatin)//GO:0005730(nucleolus)	GO:0046872(metal ion binding)//GO:0003677(DNA binding)//GO:0000981(DNA-binding transcription factor activity, RNA polymerase II-specific)//GO:0000978(RNA polymerase II cis-regulatory region sequence-specific DNA binding)//GO:0003676(nucleic acid binding)
ENSG00000081853	4.71894	2.23846	6.7161e-11	3.38128e-09	up	104	32	3.30347	1.13762	chr5	141338760	141512975	+	chr5:141338760-141512975	PCDHGA2	protein_coding	56113	PCDH-GAMMA-A2	MIM:606289|HGNC:HGNC:8700|Ensembl:ENSG00000081853	5q31.3	protocadherin gamma subfamily A, 2		GO:0007156(homophilic cell adhesion via plasma membrane adhesion molecules)//GO:0007155(cell adhesion)	GO:0005886(plasma membrane)//GO:0016020(membrane)//GO:0016021(integral component of membrane)//GO:0005887(integral component of plasma membrane)	GO:0005509(calcium ion binding)
ENSG00000082074	2.11764	1.08246	3.31527e-07	5.96001e-06	up	2097	1443	7.61665	6.53532	chr5	39105252	39274528	-	chr5:39105252-39274528	FYB1	protein_coding	2533	ADAP|FYB|PRO0823|SLAP-130|SLAP130|THC3	MIM:602731|HGNC:HGNC:4036|Ensembl:ENSG00000082074	5p13.1	FYN binding protein 1	hsa04015(Rap1 signaling pathway)//hsa05135(Yersinia infection)	GO:0006955(immune response)//GO:0007229(integrin-mediated signaling pathway)//GO:0050852(T cell receptor signaling pathway)//GO:0008150(biological_process)//GO:0072659(protein localization to plasma membrane)	GO:0005886(plasma membrane)//GO:0015629(actin cytoskeleton)//GO:0005634(nucleus)//GO:0005737(cytoplasm)//GO:0030054(cell junction)//GO:0005829(cytosol)//GO:0032991(protein-containing complex)	GO:0005515(protein binding)//GO:0008289(lipid binding)//GO:0005102(signaling receptor binding)//GO:0044877(protein-containing complex binding)
ENSG00000082458	4.27474	2.09584	0.0103994	0.0415246	up	15	5	0.631698	-1.09718	chrX	70444835	70505490	+	chrX:70444835-70505490	DLG3	protein_coding	1741	MRX|MRX90|NEDLG|PPP1R82|SAP102|XLMR	MIM:300189|HGNC:HGNC:2902|Ensembl:ENSG00000082458	Xq13.1	discs large MAGUK scaffold protein 3	hsa04390(Hippo signaling pathway)//hsa04530(Tight junction)//hsa05165(Human papillomavirus infection)	GO:0099562(maintenance of postsynaptic density structure)//GO:0001736(establishment of planar polarity)//GO:0045197(establishment or maintenance of epithelial cell apical/basal polarity)//GO:0061098(positive regulation of protein tyrosine kinase activity)//GO:0099072(regulation of postsynaptic membrane neurotransmitter receptor levels)//GO:0008285(negative regulation of cell population proliferat…	GO:0005737(cytoplasm)//GO:0005886(plasma membrane)//GO:0005911(cell-cell junction)//GO:0005923(bicellular tight junction)//GO:0014069(postsynaptic density)//GO:0030426(growth cone)//GO:0032281(AMPA glutamate receptor complex)//GO:0043025(neuronal cell body)//GO:0043198(dendritic shaft)//GO:0045202(synapse)//GO:0098978(glutamatergic synapse)//GO:0099092(postsynaptic density, intracellular componen…	GO:0005515(protein binding)//GO:0008022(protein C-terminus binding)//GO:0019903(protein phosphatase binding)//GO:0019904(protein domain specific binding)//GO:0030165(PDZ domain binding)//GO:0031625(ubiquitin protein ligase binding)//GO:0035255(ionotropic glutamate receptor binding)//GO:0098919(structural constituent of postsynaptic density)//GO:0019902(phosphatase binding)//GO:0019900(kinase bind…
ENSG00000082497	89.4622	6.48321	0.00242129	0.0125332	up	9	0	-0.0170497	-2.77056	chr1	210232796	210246631	+	chr1:210232796-210246631	SERTAD4	protein_coding	56256	DJ667H12.2	HGNC:HGNC:25236|Ensembl:ENSG00000082497	1q32.2	SERTA domain containing 4			GO:0005634(nucleus)	GO:0005515(protein binding)
ENSG00000082684	99.2913	6.6336	0.00126829	0.00735485	up	10	0	0.1134	-2.77056	chr3	122909082	123028605	-	chr3:122909082-123028605	SEMA5B	protein_coding	54437	SEMAG|SemG	MIM:609298|HGNC:HGNC:10737|Ensembl:ENSG00000082684	3q21.1	semaphorin 5B	hsa04360(Axon guidance)	GO:0007275(multicellular organism development)//GO:0030154(cell differentiation)//GO:0007399(nervous system development)//GO:0001755(neural crest cell migration)//GO:0007411(axon guidance)//GO:0030335(positive regulation of cell migration)//GO:0048843(negative regulation of axon extension involved in axon guidance)//GO:0071526(semaphorin-plexin signaling pathway)//GO:0050919(negative chemotaxis)/…	GO:0016020(membrane)//GO:0016021(integral component of membrane)	GO:0005515(protein binding)//GO:0030215(semaphorin receptor binding)//GO:0045499(chemorepellent activity)
ENSG00000082781	3.36017	1.74853	6.42425e-08	1.45216e-06	up	104	45	3.30347	1.60145	chr3	124761948	124901418	-	chr3:124761948-124901418	ITGB5	protein_coding	3693	-	MIM:147561|HGNC:HGNC:6160|Ensembl:ENSG00000082781	3q21.2	integrin subunit beta 5	hsa04145(Phagosome)//hsa04151(PI3K-Akt signaling pathway)//hsa04510(Focal adhesion)//hsa04512(ECM-receptor interaction)//hsa04810(Regulation of actin cytoskeleton)//hsa05165(Human papillomavirus infection)//hsa05205(Proteoglycans in cancer)//hsa05410(Hypertrophic cardiomyopathy)//hsa05412(Arrhythmogenic right ventricular cardiomyopathy)//hsa05414(Dilated cardiomyopathy)	GO:0007229(integrin-mediated signaling pathway)//GO:0007155(cell adhesion)//GO:0016032(viral process)//GO:0046718(viral entry into host cell)//GO:0016477(cell migration)//GO:0002479(antigen processing and presentation of exogenous peptide antigen via MHC class I, TAP-dependent)//GO:0007160(cell-matrix adhesion)//GO:0033627(cell adhesion mediated by integrin)//GO:0043149(stress fiber assembly)//GO…	GO:0008305(integrin complex)//GO:0016020(membrane)//GO:0016021(integral component of membrane)//GO:0005925(focal adhesion)//GO:0009986(cell surface)//GO:0005886(plasma membrane)//GO:0070062(extracellular exosome)//GO:0043235(receptor complex)//GO:0034684(integrin alphav-beta5 complex)//GO:0045335(phagocytic vesicle)//GO:0030054(cell junction)	GO:0038023(signaling receptor activity)//GO:0005515(protein binding)//GO:0005178(integrin binding)//GO:0001618(virus receptor activity)
ENSG00000083067	6.99037	2.80537	0.00118753	0.00700782	up	15	3	0.631698	-1.56032	chr9	70529060	71446904	-	chr9:70529060-71446904	TRPM3	protein_coding	80036	GON-2|LTRPC3|MLSN2	MIM:608961|HGNC:HGNC:17992|Ensembl:ENSG00000083067	9q21.12-q21.13	transient receptor potential cation channel subfamily M member 3		GO:0006811(ion transport)//GO:0055085(transmembrane transport)//GO:0006812(cation transport)//GO:0034220(ion transmembrane transport)//GO:0051262(protein tetramerization)//GO:0016048(detection of temperature stimulus)//GO:0050951(sensory perception of temperature stimulus)//GO:0006816(calcium ion transport)//GO:0070588(calcium ion transmembrane transport)//GO:0070838(divalent metal ion transport)…	GO:0016021(integral component of membrane)//GO:0016020(membrane)//GO:0005886(plasma membrane)//GO:0005887(integral component of plasma membrane)	GO:0005216(ion channel activity)//GO:0005227(calcium activated cation channel activity)//GO:0005262(calcium channel activity)//GO:0005261(cation channel activity)
ENSG00000083290	2.11032	1.07746	0.000746897	0.00470933	up	87	60	3.05016	1.99896	chr17	19770829	19867936	-	chr17:19770829-19867936	ULK2	protein_coding	9706	ATG1B|Unc51.2	MIM:608650|HGNC:HGNC:13480|Ensembl:ENSG00000083290	17p11.2	unc-51 like autophagy activating kinase 2	hsa04136(Autophagy - other)//hsa04140(Autophagy - animal)//hsa04150(mTOR signaling pathway)//hsa05010(Alzheimer disease)//hsa05014(Amyotrophic lateral sclerosis)//hsa05016(Huntington disease)//hsa05017(Spinocerebellar ataxia)//hsa05022(Pathways of neurodegeneration - multiple diseases)	GO:0007165(signal transduction)//GO:0006468(protein phosphorylation)//GO:0007409(axonogenesis)//GO:0016310(phosphorylation)//GO:0006914(autophagy)//GO:0007399(nervous system development)//GO:0075044(positive regulation by symbiont of host autophagy)//GO:0046777(protein autophosphorylation)//GO:0042594(response to starvation)//GO:0048675(axon extension)	GO:0016020(membrane)//GO:0031410(cytoplasmic vesicle)//GO:0030659(cytoplasmic vesicle membrane)//GO:0034045(phagophore assembly site membrane)	GO:0005524(ATP binding)//GO:0004674(protein serine/threonine kinase activity)//GO:0004672(protein kinase activity)//GO:0000166(nucleotide binding)//GO:0016301(kinase activity)//GO:0016740(transferase activity)//GO:0005515(protein binding)
ENSG00000083750	2.05568	1.03961	2.43097e-05	0.000256842	up	278	197	4.70851	3.67686	chrX	55717749	55758774	+	chrX:55717749-55758774	RRAGB	protein_coding	10325	RAGB|bA465E19.1	MIM:300725|HGNC:HGNC:19901|Ensembl:ENSG00000083750	Xp11.21	Ras related GTP binding B	hsa04140(Autophagy - animal)//hsa04150(mTOR signaling pathway)//hsa05131(Shigellosis)	GO:0071230(cellular response to amino acid stimulus)//GO:0010506(regulation of autophagy)//GO:0032008(positive regulation of TOR signaling)//GO:0032006(regulation of TOR signaling)//GO:0007050(cell cycle arrest)//GO:0016241(regulation of macroautophagy)//GO:0034198(cellular response to amino acid starvation)//GO:0034613(cellular protein localization)//GO:0009267(cellular response to starvation)//…	GO:0005737(cytoplasm)//GO:0005765(lysosomal membrane)//GO:0005764(lysosome)//GO:0005634(nucleus)//GO:0005829(cytosol)//GO:0034448(EGO complex)//GO:1990131(Gtr1-Gtr2 GTPase complex)	GO:0005525(GTP binding)//GO:0000166(nucleotide binding)//GO:0016787(hydrolase activity)//GO:0005515(protein binding)//GO:0003924(GTPase activity)//GO:0032561(guanyl ribonucleotide binding)//GO:0051020(GTPase binding)
ENSG00000084710	4.99883	2.32159	1.62683e-06	2.44182e-05	up	45	13	2.1227	-0.0279156	chr2	25042076	25159135	+	chr2:25042076-25159135	EFR3B	protein_coding	22979	KIAA0953	MIM:616797|HGNC:HGNC:29155|Ensembl:ENSG00000084710	2p23.3	EFR3 homolog B		GO:0046854(phosphatidylinositol phosphorylation)//GO:0072659(protein localization to plasma membrane)	GO:0005737(cytoplasm)//GO:0016020(membrane)//GO:0005829(cytosol)//GO:0005886(plasma membrane)//GO:0015629(actin cytoskeleton)	GO:0005515(protein binding)
ENSG00000085117	2.78312	1.4767	3.64082e-10	1.55766e-08	up	491	257	5.52564	4.05657	chr11	44564427	44620358	+	chr11:44564427-44620358	CD82	protein_coding	3732	4F9|C33|GR15|IA4|KAI1|R2|SAR2|ST6|TSPAN27	MIM:600623|HGNC:HGNC:6210|Ensembl:ENSG00000085117	11p11.2	CD82 molecule	hsa04115(p53 signaling pathway)		GO:0016021(integral component of membrane)//GO:0016020(membrane)//GO:0005886(plasma membrane)//GO:0005887(integral component of plasma membrane)//GO:0070062(extracellular exosome)	GO:0005515(protein binding)
ENSG00000085185	2.0142	1.01021	3.13178e-05	0.000317728	up	318	230	4.90143	3.89792	chrX	129981107	130058071	+	chrX:129981107-130058071	BCORL1	protein_coding	63035	BCoR-L1|CXorf10|SHUVER	MIM:300688|HGNC:HGNC:25657|Ensembl:ENSG00000085185	Xq26.1	BCL6 corepressor like 1		GO:0006325(chromatin organization)	GO:0005634(nucleus)//GO:0005654(nucleoplasm)//GO:0005886(plasma membrane)	GO:0005515(protein binding)
ENSG00000085514	5.03729	2.33265	4.35654e-09	1.36997e-07	up	73	21	2.80193	0.579417	chr7	100367530	100400096	+	chr7:100367530-100400096	PILRA	protein_coding	29992	FDF03	MIM:605341|HGNC:HGNC:20396|Ensembl:ENSG00000085514	7q22.1	paired immunoglobin like type 2 receptor alpha	hsa05168(Herpes simplex virus 1 infection)	GO:0016032(viral process)//GO:0050776(regulation of immune response)//GO:0007165(signal transduction)	GO:0016020(membrane)//GO:0016021(integral component of membrane)//GO:0005886(plasma membrane)//GO:0005576(extracellular region)//GO:0070062(extracellular exosome)	GO:0005515(protein binding)//GO:0042288(MHC class I protein binding)
ENSG00000085552	2.13371	1.09337	0.000318535	0.00229347	up	107	73	3.3439	2.27244	chr1	159927039	159945613	-	chr1:159927039-159945613	IGSF9	protein_coding	57549	FP18798|IGSF9A|Nrt1	MIM:609738|HGNC:HGNC:18132|Ensembl:ENSG00000085552	1q23.2	immunoglobulin superfamily member 9		GO:0007155(cell adhesion)//GO:0007275(multicellular organism development)//GO:0030154(cell differentiation)//GO:0007399(nervous system development)//GO:0007411(axon guidance)//GO:0007156(homophilic cell adhesion via plasma membrane adhesion molecules)//GO:0070593(dendrite self-avoidance)//GO:0016358(dendrite development)//GO:0050807(regulation of synapse organization)	GO:0016020(membrane)//GO:0016021(integral component of membrane)//GO:0005886(plasma membrane)//GO:0030054(cell junction)//GO:0045202(synapse)//GO:0030424(axon)//GO:0030425(dendrite)//GO:0060077(inhibitory synapse)	GO:0005515(protein binding)//GO:0098632(cell-cell adhesion mediator activity)
ENSG00000085741	6.99037	2.80537	0.00118753	0.00700782	up	15	3	0.631698	-1.56032	chr11	76186325	76210736	-	chr11:76186325-76210736	WNT11	protein_coding	7481	HWNT11	MIM:603699|HGNC:HGNC:12776|Ensembl:ENSG00000085741	11q13.5	Wnt family member 11	hsa04150(mTOR signaling pathway)//hsa04310(Wnt signaling pathway)//hsa04390(Hippo signaling pathway)//hsa04550(Signaling pathways regulating pluripotency of stem cells)//hsa04916(Melanogenesis)//hsa04934(Cushing syndrome)//hsa05010(Alzheimer disease)//hsa05022(Pathways of neurodegeneration - multiple diseases)//hsa05165(Human papillomavirus infection)//hsa05200(Pathways in cancer)//hsa05205(Prote…	GO:0007275(multicellular organism development)//GO:0016055(Wnt signaling pathway)//GO:0043066(negative regulation of apoptotic process)//GO:0048706(embryonic skeletal system development)//GO:0045893(positive regulation of transcription, DNA-templated)//GO:0032147(activation of protein kinase activity)//GO:0043547(positive regulation of GTPase activity)//GO:0010628(positive regulation of gene expr…	GO:0005576(extracellular region)//GO:0005737(cytoplasm)//GO:0005615(extracellular space)//GO:0031012(extracellular matrix)	GO:0005102(signaling receptor binding)//GO:0005515(protein binding)//GO:0005096(GTPase activator activity)//GO:0005125(cytokine activity)//GO:0005109(frizzled binding)//GO:0030295(protein kinase activator activity)
ENSG00000086288	2.60722	1.38251	0.00834208	0.0349037	up	27	15	1.41774	0.149505	chr7	37848597	37900397	+	chr7:37848597-37900397	NME8	protein_coding	51314	CILD6|HEL-S-99|NM23-H8|SPTRX2|TXNDC3|sptrx-2	MIM:607421|HGNC:HGNC:16473|Ensembl:ENSG00000086288	7p14.1	NME/NM23 family member 8		GO:0045454(cell redox homeostasis)//GO:0007275(multicellular organism development)//GO:0030154(cell differentiation)//GO:0007283(spermatogenesis)//GO:0030317(flagellated sperm motility)//GO:0034614(cellular response to reactive oxygen species)//GO:0060271(cilium assembly)	GO:0005737(cytoplasm)//GO:0005634(nucleus)//GO:0016607(nuclear speck)//GO:0005829(cytosol)//GO:0097225(sperm midpiece)//GO:0005930(axoneme)//GO:0036157(outer dynein arm)//GO:0097228(sperm principal piece)//GO:0097598(sperm cytoplasmic droplet)	GO:0008017(microtubule binding)
ENSG00000086717	50.1457	5.64805	0.0336166	0.10732	up	5	0	-0.703312	-2.77056	chrX	18675909	18827921	+	chrX:18675909-18827921	PPEF1	protein_coding	5475	PP7|PPEF|PPP7C|PPP7CA	MIM:300109|HGNC:HGNC:9243|Ensembl:ENSG00000086717	Xp22.13	protein phosphatase with EF-hand domain 1		GO:0050906(detection of stimulus involved in sensory perception)//GO:0006470(protein dephosphorylation)//GO:0022400(regulation of rhodopsin mediated signaling pathway)	GO:0005634(nucleus)//GO:0005829(cytosol)	GO:0005515(protein binding)//GO:0030145(manganese ion binding)//GO:0016787(hydrolase activity)//GO:0005509(calcium ion binding)//GO:0005506(iron ion binding)//GO:0004721(phosphoprotein phosphatase activity)//GO:0046872(metal ion binding)//GO:0004722(protein serine/threonine phosphatase activity)
ENSG00000087076	7.18453	2.84489	1.84384e-08	4.9277e-07	up	45	9	2.1227	-0.465675	chr19	48813018	48836510	-	chr19:48813018-48836510	HSD17B14	protein_coding	51171	DHRS10|SDR47C1|retSDR3	MIM:612832|HGNC:HGNC:23238|Ensembl:ENSG00000087076	19q13.33	hydroxysteroid 17-beta dehydrogenase 14		GO:0055114(oxidation-reduction process)//GO:0006629(lipid metabolic process)//GO:0008202(steroid metabolic process)//GO:0006703(estrogen biosynthetic process)//GO:0006706(steroid catabolic process)	GO:0005737(cytoplasm)//GO:0005829(cytosol)	GO:0016491(oxidoreductase activity)//GO:0005515(protein binding)//GO:0042802(identical protein binding)//GO:0004303(estradiol 17-beta-dehydrogenase activity)//GO:0047045(testosterone 17-beta-dehydrogenase (NADP+) activity)
ENSG00000087258	8.11563	3.0207	2.84737e-05	0.000294224	up	23	4	1.20011	-1.31025	chr16	56191390	56357444	+	chr16:56191390-56357444	GNAO1	protein_coding	2775	DEE17|EIEE17|G-ALPHA-o|GNAO|HLA-DQB1|NEDIM	MIM:139311|HGNC:HGNC:4389|Ensembl:ENSG00000087258	16q13	G protein subunit alpha o1	hsa04015(Rap1 signaling pathway)//hsa04713(Circadian entrainment)//hsa04723(Retrograde endocannabinoid signaling)//hsa04724(Glutamatergic synapse)//hsa04725(Cholinergic synapse)//hsa04726(Serotonergic synapse)//hsa04727(GABAergic synapse)//hsa04728(Dopaminergic synapse)//hsa04730(Long-term depression)//hsa04915(Estrogen signaling pathway)//hsa04916(Melanogenesis)//hsa04921(Oxytocin signaling path…	GO:0007186(G protein-coupled receptor signaling pathway)//GO:0007165(signal transduction)//GO:0007188(adenylate cyclase-modulating G protein-coupled receptor signaling pathway)//GO:0006457(protein folding)//GO:0006936(muscle contraction)//GO:0007212(dopamine receptor signaling pathway)//GO:0007223(Wnt signaling pathway, calcium modulating pathway)//GO:0007568(aging)//GO:0007626(locomotory behavio…	GO:0016020(membrane)//GO:0005886(plasma membrane)//GO:0005834(heterotrimeric G-protein complex)//GO:0030425(dendrite)//GO:0032991(protein-containing complex)//GO:0043005(neuron projection)//GO:0043209(myelin sheath)//GO:0044297(cell body)	GO:0005525(GTP binding)//GO:0003924(GTPase activity)//GO:0031683(G-protein beta/gamma-subunit complex binding)//GO:0019001(guanyl nucleotide binding)//GO:0046872(metal ion binding)//GO:0000166(nucleotide binding)//GO:0005515(protein binding)//GO:0001664(G protein-coupled receptor binding)//GO:0031821(G protein-coupled serotonin receptor binding)//GO:0031852(mu-type opioid receptor binding)//GO:00…
ENSG00000087494	59.9748	5.90628	0.0172979	0.0626804	up	6	0	-0.498824	-2.77056	chr12	27958084	27972733	-	chr12:27958084-27972733	PTHLH	protein_coding	5744	BDE2|HHM|PLP|PTHR|PTHRP	MIM:168470|HGNC:HGNC:9607|Ensembl:ENSG00000087494	12p11.22	parathyroid hormone like hormone	hsa04928(Parathyroid hormone synthesis, secretion and action)	GO:0030282(bone mineralization)//GO:0007165(signal transduction)//GO:0007186(G protein-coupled receptor signaling pathway)//GO:0007267(cell-cell signaling)//GO:0007189(adenylate cyclase-activating G protein-coupled receptor signaling pathway)//GO:0008285(negative regulation of cell population proliferation)//GO:0010468(regulation of gene expression)//GO:0008544(epidermis development)//GO:0008284(…	GO:0005576(extracellular region)//GO:0005634(nucleus)//GO:0005737(cytoplasm)//GO:0005794(Golgi apparatus)//GO:0005654(nucleoplasm)//GO:0005829(cytosol)//GO:0005615(extracellular space)	GO:0005179(hormone activity)//GO:0005515(protein binding)//GO:0051428(peptide hormone receptor binding)
ENSG00000088002	4.67594	2.22526	0.0160841	0.0595387	up	10	3	0.1134	-1.56032	chr19	48552172	48599425	+	chr19:48552172-48599425	SULT2B1	protein_coding	6820	ARCI14|HSST2	MIM:604125|HGNC:HGNC:11459|Ensembl:ENSG00000088002	19q13.33	sulfotransferase family 2B member 1	hsa00140(Steroid hormone biosynthesis)	GO:0006629(lipid metabolic process)//GO:0008202(steroid metabolic process)//GO:0008203(cholesterol metabolic process)//GO:0008285(negative regulation of cell population proliferation)//GO:0051923(sulfation)//GO:0045606(positive regulation of epidermal cell differentiation)//GO:0050427(3'-phosphoadenosine 5'-phosphosulfate metabolic process)	GO:0005634(nucleus)//GO:0005737(cytoplasm)//GO:0043231(intracellular membrane-bounded organelle)//GO:0005783(endoplasmic reticulum)//GO:0005829(cytosol)//GO:0070062(extracellular exosome)	GO:0008146(sulfotransferase activity)//GO:0016740(transferase activity)//GO:0005515(protein binding)//GO:0003676(nucleic acid binding)//GO:0004027(alcohol sulfotransferase activity)//GO:0015485(cholesterol binding)//GO:0050294(steroid sulfotransferase activity)//GO:1990239(steroid hormone binding)
ENSG00000088367	2.51034	1.32788	0.000464327	0.00314339	up	57	33	2.45348	1.1791	chr20	36091504	36232799	+	chr20:36091504-36232799	EPB41L1	protein_coding	2036	4.1N|MRD11	MIM:602879|HGNC:HGNC:3378|Ensembl:ENSG00000088367	20q11.23	erythrocyte membrane protein band 4.1 like 1		GO:0030866(cortical actin cytoskeleton organization)//GO:0031032(actomyosin structure organization)	GO:0005856(cytoskeleton)//GO:0005737(cytoplasm)//GO:0005886(plasma membrane)//GO:0005829(cytosol)	GO:0005198(structural molecule activity)//GO:0008092(cytoskeletal protein binding)//GO:0003779(actin binding)//GO:0005515(protein binding)
ENSG00000088808	2.31849	1.21319	0.00119501	0.00704462	up	59	37	2.50192	1.33403	chr14	103733195	103847575	-	chr14:103733195-103847575	PPP1R13B	protein_coding	23368	ASPP1|p53BP2-like|p85	MIM:606455|HGNC:HGNC:14950|Ensembl:ENSG00000088808	14q32.33	protein phosphatase 1 regulatory subunit 13B		GO:0006915(apoptotic process)//GO:0045786(negative regulation of cell cycle)//GO:0042981(regulation of apoptotic process)//GO:1901796(regulation of signal transduction by p53 class mediator)//GO:1900740(positive regulation of protein insertion into mitochondrial membrane involved in apoptotic signaling pathway)//GO:0072332(intrinsic apoptotic signaling pathway by p53 class mediator)//GO:1901216(p…	GO:0005739(mitochondrion)//GO:0005634(nucleus)//GO:0005737(cytoplasm)//GO:0005654(nucleoplasm)//GO:0005829(cytosol)//GO:0005886(plasma membrane)//GO:0048471(perinuclear region of cytoplasm)	GO:0005515(protein binding)//GO:0008134(transcription factor binding)//GO:0002039(p53 binding)
ENSG00000088826	2.11592	1.08129	0.00199822	0.0107613	up	64	44	2.61636	1.57061	chr20	4120980	4187747	+	chr20:4120980-4187747	SMOX	protein_coding	54498	C20orf16|PAO|PAO-1|PAO1|PAOH|PAOH1|SMO	MIM:615854|HGNC:HGNC:15862|Ensembl:ENSG00000088826	20p13	spermine oxidase	hsa00330(Arginine and proline metabolism)//hsa00410(beta-Alanine metabolism)//hsa01100(Metabolic pathways)	GO:0055114(oxidation-reduction process)//GO:0006596(polyamine biosynthetic process)//GO:0046208(spermine catabolic process)//GO:0006598(polyamine catabolic process)	GO:0005634(nucleus)//GO:0005737(cytoplasm)//GO:0043231(intracellular membrane-bounded organelle)//GO:0005654(nucleoplasm)//GO:0005829(cytosol)//GO:0031965(nuclear membrane)	GO:0016491(oxidoreductase activity)//GO:0046592(polyamine oxidase activity)//GO:0052901(spermine:oxygen oxidoreductase (spermidine-forming) activity)//GO:0052894(norspermine:oxygen oxidoreductase activity)//GO:0052895(N1-acetylspermine:oxygen oxidoreductase (N1-acetylspermidine-forming) activity)
ENSG00000088827	3.11995	1.64152	2.5296e-12	1.82727e-10	up	559	261	5.7122	4.07865	chr20	3686970	3712600	-	chr20:3686970-3712600	SIGLEC1	protein_coding	6614	CD169|SIGLEC-1|SN	MIM:600751|HGNC:HGNC:11127|Ensembl:ENSG00000088827	20p13	sialic acid binding Ig like lectin 1	hsa04514(Cell adhesion molecules)	GO:0007155(cell adhesion)//GO:0006954(inflammatory response)//GO:0006897(endocytosis)//GO:0007160(cell-matrix adhesion)//GO:0098609(cell-cell adhesion)//GO:0075512(clathrin-dependent endocytosis of virus by host cell)	GO:0016020(membrane)//GO:0016021(integral component of membrane)//GO:0005886(plasma membrane)//GO:0005576(extracellular region)//GO:0005769(early endosome)//GO:0005770(late endosome)	GO:0030246(carbohydrate binding)//GO:0046790(virion binding)
ENSG00000088899	3.34244	1.7409	0.0347041	0.109912	up	14	6	0.541877	-0.911577	chr20	3162617	3173549	-	chr20:3162617-3173549	LZTS3	protein_coding	9762	PROSAPIP1	MIM:610484|HGNC:HGNC:30139|Ensembl:ENSG00000088899	20p13	leucine zipper tumor suppressor family member 3		GO:0061001(regulation of dendritic spine morphogenesis)	GO:0014069(postsynaptic density)//GO:0005737(cytoplasm)//GO:0005856(cytoskeleton)//GO:0030054(cell junction)//GO:0042995(cell projection)//GO:0030425(dendrite)//GO:0045202(synapse)//GO:0043197(dendritic spine)
ENSG00000088970	2.80884	1.48997	1.3381e-11	7.93977e-10	up	1174	609	6.7806	5.29388	chr20	21125983	21246622	+	chr20:21125983-21246622	KIZ	protein_coding	55857	C20orf19|HT013|Kizuna|NCRNA00153|PLK1S1|RP69	MIM:615757|HGNC:HGNC:15865|Ensembl:ENSG00000088970	20p11.23	kizuna centrosomal protein		GO:0007051(spindle organization)	GO:0005813(centrosome)//GO:0005737(cytoplasm)//GO:0005856(cytoskeleton)//GO:0042995(cell projection)//GO:0005815(microtubule organizing center)//GO:0016020(membrane)//GO:0016021(integral component of membrane)	GO:0005515(protein binding)//GO:0019901(protein kinase binding)
ENSG00000089041	3.11163	1.63767	1.32818e-12	1.01069e-10	up	660	309	5.9512	4.32026	chr12	121132819	121188032	+	chr12:121132819-121188032	P2RX7	protein_coding	5027	P2X7	MIM:602566|HGNC:HGNC:8537|Ensembl:ENSG00000089041	12q24.31	purinergic receptor P2X 7	hsa04020(Calcium signaling pathway)//hsa04080(Neuroactive ligand-receptor interaction)//hsa04621(NOD-like receptor signaling pathway)	GO:0006811(ion transport)//GO:0034220(ion transmembrane transport)//GO:0035590(purinergic nucleotide receptor signaling pathway)//GO:0033198(response to ATP)//GO:0098655(cation transmembrane transport)//GO:0043409(negative regulation of MAPK cascade)//GO:0002931(response to ischemia)//GO:0060079(excitatory postsynaptic potential)//GO:0030501(positive regulation of bone mineralization)//GO:0010628…	GO:0016020(membrane)//GO:0016021(integral component of membrane)//GO:0005887(integral component of plasma membrane)//GO:0005737(cytoplasm)//GO:0005886(plasma membrane)//GO:0098793(presynapse)//GO:0098794(postsynapse)//GO:0005639(integral component of nuclear inner membrane)//GO:0032059(bleb)	GO:0005524(ATP binding)//GO:0005216(ion channel activity)//GO:0001614(purinergic nucleotide receptor activity)//GO:0004931(extracellularly ATP-gated cation channel activity)//GO:0005515(protein binding)//GO:0001530(lipopolysaccharide binding)//GO:0005102(signaling receptor binding)//GO:0042802(identical protein binding)
ENSG00000089101	11.601	3.53618	4.57911e-05	0.000444036	up	17	2	0.796127	-1.86302	chr20	20052514	20360703	+	chr20:20052514-20360703	CFAP61	protein_coding	26074	C20orf26|CaM-IP3|dJ1002M8.3|dJ1178H5.4	HGNC:HGNC:15872|Ensembl:ENSG00000089101	20p11.23	cilia and flagella associated protein 61		GO:0003341(cilium movement)//GO:0044782(cilium organization)	GO:0005737(cytoplasm)//GO:0005856(cytoskeleton)//GO:0031514(motile cilium)//GO:0042995(cell projection)//GO:0005930(axoneme)//GO:0001536(radial spoke stalk)//GO:0016020(membrane)//GO:0016021(integral component of membrane)
ENSG00000089127	5.03696	2.33255	1.16997e-21	4.02167e-19	up	588	170	5.78497	3.46682	chr12	112905856	112933219	+	chr12:112905856-112933219	OAS1	protein_coding	4938	E18/E16|IFI-4|OIAS|OIASI	MIM:164350|HGNC:HGNC:8086|Ensembl:ENSG00000089127	12q24.13	2'-5'-oligoadenylate synthetase 1	hsa04621(NOD-like receptor signaling pathway)//hsa05160(Hepatitis C)//hsa05162(Measles)//hsa05164(Influenza A)//hsa05168(Herpes simplex virus 1 infection)//hsa05169(Epstein-Barr virus infection)//hsa05171(Coronavirus disease - COVID-19)	GO:0051607(defense response to virus)//GO:0002376(immune system process)//GO:0045087(innate immune response)//GO:0006164(purine nucleotide biosynthetic process)//GO:0006006(glucose metabolic process)//GO:0009615(response to virus)//GO:0045071(negative regulation of viral genome replication)//GO:0051259(protein complex oligomerization)//GO:0060333(interferon-gamma-mediated signaling pathway)//GO:0…	GO:0005634(nucleus)//GO:0005737(cytoplasm)//GO:0005783(endoplasmic reticulum)//GO:0005654(nucleoplasm)//GO:0005829(cytosol)//GO:0043231(intracellular membrane-bounded organelle)//GO:0005739(mitochondrion)//GO:0005576(extracellular region)//GO:0016020(membrane)	GO:0016779(nucleotidyltransferase activity)//GO:0003725(double-stranded RNA binding)//GO:0001730(2'-5'-oligoadenylate synthetase activity)//GO:0003723(RNA binding)//GO:0046872(metal ion binding)//GO:0000166(nucleotide binding)//GO:0005524(ATP binding)//GO:0016740(transferase activity)//GO:0005515(protein binding)
ENSG00000089177	2.14888	1.10359	2.8456e-06	4.0179e-05	up	413	280	5.27692	4.17918	chr20	16272104	16573448	-	chr20:16272104-16573448	KIF16B	protein_coding	55614	C20orf23|KISC20ORF|SNX23	MIM:618171|HGNC:HGNC:15869|Ensembl:ENSG00000089177	20p12.1	kinesin family member 16B		GO:0007018(microtubule-based movement)//GO:0045022(early endosome to late endosome transport)//GO:0006895(Golgi to endosome transport)//GO:0007173(epidermal growth factor receptor signaling pathway)//GO:0008543(fibroblast growth factor receptor signaling pathway)//GO:0007492(endoderm development)//GO:0032801(receptor catabolic process)//GO:0001919(regulation of receptor recycling)//GO:0001704(for…	GO:0005737(cytoplasm)//GO:0016020(membrane)//GO:0005856(cytoskeleton)//GO:0005768(endosome)//GO:0005874(microtubule)//GO:0005769(early endosome)//GO:0005829(cytosol)//GO:0031901(early endosome membrane)//GO:0005819(spindle)//GO:0005871(kinesin complex)	GO:0005524(ATP binding)//GO:0005515(protein binding)//GO:0008017(microtubule binding)//GO:0035091(phosphatidylinositol binding)//GO:0003777(microtubule motor activity)//GO:0000166(nucleotide binding)//GO:0003774(motor activity)//GO:0008289(lipid binding)//GO:0016887(ATPase activity)//GO:0032266(phosphatidylinositol-3-phosphate binding)//GO:0080025(phosphatidylinositol-3,5-bisphosphate binding)//G…
ENSG00000089335	2.60488	1.38122	2.90262e-07	5.33852e-06	up	195	109	4.20034	2.83628	chr19	34677639	34686397	+	chr19:34677639-34686397	ZNF302	protein_coding	55900	HSD16|MST154|MSTP154|ZNF135L|ZNF140L|ZNF327	HGNC:HGNC:13848|Ensembl:ENSG00000089335	19q13.11	zinc finger protein 302	hsa05168(Herpes simplex virus 1 infection)	GO:0006355(regulation of transcription, DNA-templated)//GO:0006357(regulation of transcription by RNA polymerase II)	GO:0005634(nucleus)	GO:0003676(nucleic acid binding)//GO:0046872(metal ion binding)//GO:0003677(DNA binding)//GO:0005515(protein binding)//GO:0000981(DNA-binding transcription factor activity, RNA polymerase II-specific)//GO:0000978(RNA polymerase II cis-regulatory region sequence-specific DNA binding)
ENSG00000089472	6.85256	2.77664	0.00444385	0.0207925	up	10	2	0.1134	-1.86302	chrX	66162671	66268867	+	chrX:66162671-66268867	HEPH	protein_coding	9843	CPL	MIM:300167|HGNC:HGNC:4866|Ensembl:ENSG00000089472	Xq12	hephaestin	hsa00860(Porphyrin and chlorophyll metabolism)//hsa04978(Mineral absorption)	GO:0055114(oxidation-reduction process)//GO:0006826(iron ion transport)//GO:0006879(cellular iron ion homeostasis)//GO:0006811(ion transport)//GO:0006825(copper ion transport)//GO:0055072(iron ion homeostasis)	GO:0005886(plasma membrane)//GO:0016020(membrane)//GO:0016021(integral component of membrane)//GO:0016323(basolateral plasma membrane)//GO:0048471(perinuclear region of cytoplasm)	GO:0016491(oxidoreductase activity)//GO:0005507(copper ion binding)//GO:0046872(metal ion binding)//GO:0005515(protein binding)//GO:0004322(ferroxidase activity)//GO:0008198(ferrous iron binding)
ENSG00000089775	2.11287	1.07921	1.32454e-06	2.05825e-05	up	712	491	6.06037	4.98445	chr14	64449106	64505213	-	chr14:64449106-64505213	ZBTB25	protein_coding	7597	C14orf51|KUP|ZNF46	MIM:194541|HGNC:HGNC:13112|Ensembl:ENSG00000089775	14q23.3	zinc finger and BTB domain containing 25		GO:0000122(negative regulation of transcription by RNA polymerase II)//GO:0006357(regulation of transcription by RNA polymerase II)	GO:0005634(nucleus)//GO:0005654(nucleoplasm)	GO:0005515(protein binding)//GO:0046872(metal ion binding)//GO:0003677(DNA binding)//GO:0001227(DNA-binding transcription repressor activity, RNA polymerase II-specific)//GO:0000978(RNA polymerase II cis-regulatory region sequence-specific DNA binding)//GO:0003700(DNA-binding transcription factor activity)
ENSG00000089916	2.08905	1.06285	3.42847e-07	6.13585e-06	up	5922	4131	9.11371	8.05125	chr14	76151916	76254342	+	chr14:76151916-76254342	GPATCH2L	protein_coding	55668	C14orf118	HGNC:HGNC:20210|Ensembl:ENSG00000089916	14q24.3	G-patch domain containing 2 like				GO:0005515(protein binding)
ENSG00000090006	2.3022	1.20301	2.12428e-06	3.11182e-05	up	245	155	4.5273	3.3354	chr19	40592883	40629818	+	chr19:40592883-40629818	LTBP4	protein_coding	8425	ARCL1C|LTBP-4|LTBP4L|LTBP4S	MIM:604710|HGNC:HGNC:6717|Ensembl:ENSG00000090006	19q13.2	latent transforming growth factor beta binding protein 4		GO:0007275(multicellular organism development)//GO:0006457(protein folding)//GO:0030162(regulation of proteolysis)//GO:0001558(regulation of cell growth)//GO:0045595(regulation of cell differentiation)//GO:0017015(regulation of transforming growth factor beta receptor signaling pathway)//GO:0048251(elastic fiber assembly)//GO:0030252(growth hormone secretion)//GO:0007179(transforming growth facto…	GO:0005615(extracellular space)//GO:0005576(extracellular region)//GO:0062023(collagen-containing extracellular matrix)//GO:0031012(extracellular matrix)//GO:0001527(microfibril)	GO:0005509(calcium ion binding)//GO:0005515(protein binding)//GO:0019838(growth factor binding)//GO:0050431(transforming growth factor beta binding)//GO:0005178(integrin binding)//GO:0005201(extracellular matrix structural constituent)//GO:0005539(glycosaminoglycan binding)//GO:0005024(transforming growth factor beta-activated receptor activity)
ENSG00000090104	11.9634	3.58056	1.26724e-14	1.37309e-12	up	75	9	2.84011	-0.465675	chr1	192575763	192580024	+	chr1:192575763-192580024	RGS1	protein_coding	5996	1R20|BL34|HEL-S-87|IER1|IR20	MIM:600323|HGNC:HGNC:9991|Ensembl:ENSG00000090104	1q31.2	regulator of G protein signaling 1		GO:0008277(regulation of G protein-coupled receptor signaling pathway)//GO:0007165(signal transduction)//GO:0007186(G protein-coupled receptor signaling pathway)//GO:0009968(negative regulation of signal transduction)//GO:0043547(positive regulation of GTPase activity)//GO:0006955(immune response)//GO:0007193(adenylate cyclase-inhibiting G protein-coupled receptor signaling pathway)//GO:0009617(r…	GO:0005737(cytoplasm)//GO:0016020(membrane)//GO:0005886(plasma membrane)//GO:0005829(cytosol)//GO:0031234(extrinsic component of cytoplasmic side of plasma membrane)	GO:0005096(GTPase activator activity)//GO:0003924(GTPase activity)//GO:0005516(calmodulin binding)//GO:0001965(G-protein alpha-subunit binding)
ENSG00000090238	5.2873	2.40253	1.76111e-09	6.19844e-08	up	73	20	2.80193	0.516085	chr16	30092314	30096915	-	chr16:30092314-30096915	YPEL3	protein_coding	83719	-	MIM:609724|HGNC:HGNC:18327|Ensembl:ENSG00000090238	16p11.2	yippee like 3		GO:2000774(positive regulation of cellular senescence)	GO:0005634(nucleus)//GO:0005730(nucleolus)	GO:0046872(metal ion binding)
ENSG00000090659	2.74307	1.45579	0.000260181	0.00193481	up	51	27	2.29754	0.910197	chr19	7739993	7747564	-	chr19:7739993-7747564	CD209	protein_coding	30835	CDSIGN|CLEC4L|DC-SIGN|DC-SIGN1	MIM:604672|HGNC:HGNC:1641|Ensembl:ENSG00000090659	19p13.2	CD209 molecule	hsa04145(Phagosome)//hsa04625(C-type lectin receptor signaling pathway)//hsa05152(Tuberculosis)//hsa05162(Measles)	GO:0007155(cell adhesion)//GO:0016032(viral process)//GO:0002376(immune system process)//GO:0045087(innate immune response)//GO:0002250(adaptive immune response)//GO:0006897(endocytosis)//GO:0002223(stimulatory C-type lectin receptor signaling pathway)//GO:0042102(positive regulation of T cell proliferation)//GO:0035556(intracellular signal transduction)//GO:0007157(heterophilic cell-cell adhesio…	GO:0005737(cytoplasm)//GO:0016020(membrane)//GO:0016021(integral component of membrane)//GO:0005886(plasma membrane)//GO:0005576(extracellular region)//GO:0009986(cell surface)//GO:0043657(host cell)//GO:0009897(external side of plasma membrane)	GO:0046872(metal ion binding)//GO:0030246(carbohydrate binding)//GO:0005515(protein binding)//GO:0042605(peptide antigen binding)//GO:0001618(virus receptor activity)//GO:0005537(mannose binding)//GO:0046790(virion binding)
ENSG00000090661	3.18443	1.67104	0.000844689	0.0052262	up	33	15	1.69278	0.149505	chr19	8206736	8262421	+	chr19:8206736-8262421	CERS4	protein_coding	79603	LASS4|Trh1	MIM:615334|HGNC:HGNC:23747|Ensembl:ENSG00000090661	19p13.2	ceramide synthase 4	hsa00600(Sphingolipid metabolism)//hsa01100(Metabolic pathways)//hsa04071(Sphingolipid signaling pathway)	GO:0006629(lipid metabolic process)//GO:0006665(sphingolipid metabolic process)//GO:0030148(sphingolipid biosynthetic process)//GO:0046513(ceramide biosynthetic process)	GO:0016021(integral component of membrane)//GO:0005634(nucleus)//GO:0016020(membrane)//GO:0005783(endoplasmic reticulum)//GO:0005789(endoplasmic reticulum membrane)	GO:0003677(DNA binding)//GO:0016740(transferase activity)//GO:0005515(protein binding)//GO:0016410(N-acyltransferase activity)//GO:0050291(sphingosine N-acyltransferase activity)
ENSG00000091106	2.24714	1.16809	1.47036e-05	0.000167416	up	179	116	4.07785	2.92428	chr2	32224453	32265732	-	chr2:32224453-32265732	NLRC4	protein_coding	58484	AIFEC|CARD12|CLAN|CLAN1|CLANA|CLANB|CLANC|CLAND|CLR2.1|FCAS4|IPAF	MIM:606831|HGNC:HGNC:16412|Ensembl:ENSG00000091106	2p22.3	NLR family CARD domain containing 4	hsa04621(NOD-like receptor signaling pathway)//hsa05131(Shigellosis)//hsa05132(Salmonella infection)//hsa05134(Legionellosis)//hsa05135(Yersinia infection)	GO:0042981(regulation of apoptotic process)//GO:0006915(apoptotic process)//GO:0002376(immune system process)//GO:0045087(innate immune response)//GO:0006954(inflammatory response)//GO:0042742(defense response to bacterium)//GO:0051260(protein homooligomerization)//GO:0043065(positive regulation of apoptotic process)//GO:0051092(positive regulation of NF-kappaB transcription factor activity)//GO:…	GO:0005829(cytosol)//GO:0005737(cytoplasm)//GO:0072557(IPAF inflammasome complex)	GO:0000166(nucleotide binding)//GO:0005524(ATP binding)//GO:0005515(protein binding)//GO:0042802(identical protein binding)//GO:0042803(protein homodimerization activity)//GO:0000287(magnesium ion binding)//GO:0061133(endopeptidase activator activity)//GO:0089720(caspase binding)
ENSG00000091129	6.70664	2.74559	6.61183e-08	1.48949e-06	up	42	9	2.02662	-0.465675	chr7	108147623	108456717	-	chr7:108147623-108456717	NRCAM	protein_coding	4897	-	MIM:601581|HGNC:HGNC:7994|Ensembl:ENSG00000091129	7q31.1	neuronal cell adhesion molecule	hsa04514(Cell adhesion molecules)	GO:0007155(cell adhesion)//GO:0007411(axon guidance)//GO:0001525(angiogenesis)//GO:0007409(axonogenesis)//GO:0045162(clustering of voltage-gated sodium channels)//GO:0098609(cell-cell adhesion)//GO:0001764(neuron migration)//GO:0007416(synapse assembly)//GO:0030516(regulation of axon extension)//GO:0034113(heterotypic cell-cell adhesion)//GO:0007417(central nervous system development)//GO:0045666…	GO:0005886(plasma membrane)//GO:0016020(membrane)//GO:0016021(integral component of membrane)//GO:0005576(extracellular region)//GO:0042995(cell projection)//GO:0043005(neuron projection)//GO:0030424(axon)//GO:0005887(integral component of plasma membrane)//GO:0009897(external side of plasma membrane)//GO:0043194(axon initial segment)	GO:0005515(protein binding)//GO:0030506(ankyrin binding)
ENSG00000091262	2.09977	1.07023	5.57863e-06	7.17556e-05	up	405	281	5.24881	4.18428	chr16	16149565	16223522	-	chr16:16149565-16223522	ABCC6	protein_coding	368	ABC34|ARA|EST349056|GACI2|MLP1|MOAT-E|MOATE|MRP6|PXE|PXE1|URG7	MIM:603234|HGNC:HGNC:57|Ensembl:ENSG00000091262	16p13.11	ATP binding cassette subfamily C member 6	hsa02010(ABC transporters)	GO:0055085(transmembrane transport)//GO:0007601(visual perception)//GO:0050896(response to stimulus)//GO:0071716(leukotriene transport)//GO:0042493(response to drug)//GO:0015867(ATP transport)//GO:0006855(drug transmembrane transport)//GO:0030505(inorganic diphosphate transport)	GO:0016021(integral component of membrane)//GO:0016020(membrane)//GO:0005783(endoplasmic reticulum)//GO:0005789(endoplasmic reticulum membrane)//GO:0005654(nucleoplasm)//GO:0005886(plasma membrane)//GO:0016323(basolateral plasma membrane)//GO:0016324(apical plasma membrane)//GO:0016328(lateral plasma membrane)	GO:0005524(ATP binding)//GO:0022857(transmembrane transporter activity)//GO:0042626(ATPase-coupled transmembrane transporter activity)//GO:0016887(ATPase activity)//GO:0000166(nucleotide binding)//GO:0015431(ATPase-coupled glutathione S-conjugate transmembrane transporter activity)//GO:0005215(transporter activity)//GO:0008559(ATPase-coupled xenobiotic transmembrane transporter activity)//GO:0030…
ENSG00000091409	2.33448	1.2231	2.94008e-06	4.13083e-05	up	218	136	4.35998	3.14966	chr2	172427354	172506459	+	chr2:172427354-172506459	ITGA6	protein_coding	3655	CD49f|ITGA6B|VLA-6	MIM:147556|HGNC:HGNC:6142|Ensembl:ENSG00000091409	2q31.1	integrin subunit alpha 6	hsa04151(PI3K-Akt signaling pathway)//hsa04510(Focal adhesion)//hsa04512(ECM-receptor interaction)//hsa04514(Cell adhesion molecules)//hsa04640(Hematopoietic cell lineage)//hsa04810(Regulation of actin cytoskeleton)//hsa05145(Toxoplasmosis)//hsa05165(Human papillomavirus infection)//hsa05200(Pathways in cancer)//hsa05222(Small cell lung cancer)//hsa05410(Hypertrophic cardiomyopathy)//hsa05412(Arr…	GO:0007155(cell adhesion)//GO:0007229(integrin-mediated signaling pathway)//GO:0030335(positive regulation of cell migration)//GO:0045944(positive regulation of transcription by RNA polymerase II)//GO:0050900(leukocyte migration)//GO:0043547(positive regulation of GTPase activity)//GO:0030198(extracellular matrix organization)//GO:0042327(positive regulation of phosphorylation)//GO:0010976(positi…	GO:0008305(integrin complex)//GO:0016020(membrane)//GO:0016021(integral component of membrane)//GO:0005886(plasma membrane)//GO:0005925(focal adhesion)//GO:0009986(cell surface)//GO:0005912(adherens junction)//GO:0030175(filopodium)//GO:0034676(integrin alpha6-beta4 complex)	GO:0046872(metal ion binding)//GO:0005515(protein binding)//GO:0045296(cadherin binding)//GO:0031994(insulin-like growth factor I binding)//GO:0038132(neuregulin binding)//GO:0043236(laminin binding)//GO:0044877(protein-containing complex binding)
ENSG00000091513	5.27367	2.39881	6.01139e-12	3.94241e-10	up	109	30	3.37024	1.05091	chr3	133746040	133796641	+	chr3:133746040-133796641	TF	protein_coding	7018	HEL-S-71p|PRO1557|PRO2086|TFQTL1	MIM:190000|HGNC:HGNC:11740|Ensembl:ENSG00000091513	3q22.1	transferrin	hsa04066(HIF-1 signaling pathway)//hsa04216(Ferroptosis)//hsa04978(Mineral absorption)	GO:0006826(iron ion transport)//GO:0006879(cellular iron ion homeostasis)//GO:0006811(ion transport)//GO:0055072(iron ion homeostasis)//GO:0044267(cellular protein metabolic process)//GO:0001895(retina homeostasis)//GO:0043687(post-translational protein modification)//GO:0002576(platelet degranulation)//GO:0061024(membrane organization)//GO:0048260(positive regulation of receptor-mediated endocyt…	GO:0005576(extracellular region)//GO:0005615(extracellular space)//GO:0005770(late endosome)//GO:0031410(cytoplasmic vesicle)//GO:0016324(apical plasma membrane)//GO:0048471(perinuclear region of cytoplasm)//GO:0005769(early endosome)//GO:0009986(cell surface)//GO:0055037(recycling endosome)//GO:0005905(clathrin-coated pit)//GO:0005886(plasma membrane)//GO:0070062(extracellular exosome)//GO:00725…	GO:0008199(ferric iron binding)//GO:0046872(metal ion binding)//GO:0005515(protein binding)//GO:1990459(transferrin receptor binding)//GO:0008198(ferrous iron binding)//GO:0034986(iron chaperone activity)
ENSG00000091536	4.05024	2.01801	1.19985e-05	0.000139728	up	42	15	2.02662	0.149505	chr17	18108706	18179802	+	chr17:18108706-18179802	MYO15A	protein_coding	51168	DFNB3|MYO15	MIM:602666|HGNC:HGNC:7594|Ensembl:ENSG00000091536	17p11.2	myosin XVA		GO:0007605(sensory perception of sound)//GO:0007015(actin filament organization)//GO:0030050(vesicle transport along actin filament)//GO:0007626(locomotory behavior)//GO:0042472(inner ear morphogenesis)	GO:0005856(cytoskeleton)//GO:0016459(myosin complex)//GO:0005737(cytoplasm)//GO:0042995(cell projection)//GO:0070062(extracellular exosome)//GO:0032420(stereocilium)//GO:0015629(actin cytoskeleton)//GO:0031982(vesicle)//GO:0098858(actin-based cell projection)//GO:0032421(stereocilium bundle)	GO:0005524(ATP binding)//GO:0005515(protein binding)//GO:0003774(motor activity)//GO:0003779(actin binding)//GO:0000166(nucleotide binding)//GO:0005516(calmodulin binding)//GO:0051015(actin filament binding)//GO:0000146(microfilament motor activity)//GO:0030898(actin-dependent ATPase activity)
ENSG00000091592	5.92496	2.56681	9.87798e-16	1.33971e-13	up	155	38	3.8721	1.3703	chr17	5499427	5619424	-	chr17:5499427-5619424	NLRP1	protein_coding	22861	AIADK|CARD7|CIDED|CLR17.1|DEFCAP|DEFCAP-L/S|JRRP|MSPC|NAC|NALP1|PP1044|SLEV1|VAMAS1	MIM:606636|HGNC:HGNC:14374|Ensembl:ENSG00000091592	17p13.2	NLR family pyrin domain containing 1	hsa04621(NOD-like receptor signaling pathway)	GO:0042742(defense response to bacterium)//GO:0006915(apoptotic process)//GO:0042981(regulation of apoptotic process)//GO:0045087(innate immune response)//GO:0016032(viral process)//GO:0051607(defense response to virus)//GO:0002376(immune system process)//GO:0006954(inflammatory response)//GO:0006919(activation of cysteine-type endopeptidase activity involved in apoptotic process)//GO:0070269(pyr…	GO:0005634(nucleus)//GO:0005737(cytoplasm)//GO:0005654(nucleoplasm)//GO:0005829(cytosol)//GO:0061702(inflammasome complex)//GO:0072558(NLRP1 inflammasome complex)	GO:0000166(nucleotide binding)//GO:0005524(ATP binding)//GO:0005515(protein binding)//GO:0019899(enzyme binding)//GO:0019904(protein domain specific binding)//GO:0008656(cysteine-type endopeptidase activator activity involved in apoptotic process)
ENSG00000091656	6.52748	2.70653	0.00200946	0.0107986	up	14	3	0.541877	-1.56032	chr8	76681239	76867281	+	chr8:76681239-76867281	ZFHX4	protein_coding	79776	ZFH4|ZHF4	MIM:606940|HGNC:HGNC:30939|Ensembl:ENSG00000091656	8q21.13	zinc finger homeobox 4		GO:0006355(regulation of transcription, DNA-templated)//GO:0006357(regulation of transcription by RNA polymerase II)	GO:0005634(nucleus)//GO:0000785(chromatin)	GO:0003677(DNA binding)//GO:0008270(zinc ion binding)//GO:0003676(nucleic acid binding)//GO:0000981(DNA-binding transcription factor activity, RNA polymerase II-specific)//GO:0046872(metal ion binding)//GO:0000978(RNA polymerase II cis-regulatory region sequence-specific DNA binding)
ENSG00000091664	197.583	7.62631	7.44748e-07	1.23734e-05	up	20	0	1.01221	-2.77056	chr11	22338381	22379503	+	chr11:22338381-22379503	SLC17A6	protein_coding	57084	DNPI|VGLUT2	MIM:607563|HGNC:HGNC:16703|Ensembl:ENSG00000091664	11p14.3	solute carrier family 17 member 6	hsa04721(Synaptic vesicle cycle)//hsa04723(Retrograde endocannabinoid signaling)//hsa04724(Glutamatergic synapse)//hsa05033(Nicotine addiction)	GO:0055085(transmembrane transport)//GO:0006811(ion transport)//GO:0006814(sodium ion transport)//GO:0006836(neurotransmitter transport)//GO:0015813(L-glutamate transmembrane transport)//GO:0006820(anion transport)//GO:0035249(synaptic transmission, glutamatergic)//GO:1990384(hyaloid vascular plexus regression)//GO:0050803(regulation of synapse structure or activity)//GO:0098700(neurotransmitter …	GO:0016020(membrane)//GO:0016021(integral component of membrane)//GO:0031410(cytoplasmic vesicle)//GO:0030054(cell junction)//GO:0045202(synapse)//GO:0043005(neuron projection)//GO:0030672(synaptic vesicle membrane)//GO:0030285(integral component of synaptic vesicle membrane)//GO:0060076(excitatory synapse)	GO:0022857(transmembrane transporter activity)//GO:0015293(symporter activity)//GO:0005313(L-glutamate transmembrane transporter activity)//GO:0005326(neurotransmitter transmembrane transporter activity)
ENSG00000091831	3.41627	1.77242	0.00644454	0.028029	up	19	8	0.943718	-0.599558	chr6	151656691	152129619	+	chr6:151656691-152129619	ESR1	protein_coding	2099	ER|ESR|ESRA|ESTRR|Era|NR3A1	MIM:133430|HGNC:HGNC:3467|Ensembl:ENSG00000091831	6q25.1-q25.2	estrogen receptor 1	hsa01522(Endocrine resistance)//hsa04915(Estrogen signaling pathway)//hsa04917(Prolactin signaling pathway)//hsa04919(Thyroid hormone signaling pathway)//hsa04961(Endocrine and other factor-regulated calcium reabsorption)//hsa05200(Pathways in cancer)//hsa05205(Proteoglycans in cancer)//hsa05224(Breast cancer)	GO:0006355(regulation of transcription, DNA-templated)//GO:0043401(steroid hormone mediated signaling pathway)//GO:0045944(positive regulation of transcription by RNA polymerase II)//GO:0030522(intracellular receptor signaling pathway)//GO:0045893(positive regulation of transcription, DNA-templated)//GO:0006357(regulation of transcription by RNA polymerase II)//GO:0016579(protein deubiquitination…	GO:0005634(nucleus)//GO:0005737(cytoplasm)//GO:0016020(membrane)//GO:0016021(integral component of membrane)//GO:0005886(plasma membrane)//GO:0005794(Golgi apparatus)//GO:0000785(chromatin)//GO:0005654(nucleoplasm)//GO:0005829(cytosol)//GO:0032991(protein-containing complex)//GO:0035327(transcriptionally active chromatin)//GO:0097550(transcription preinitiation complex)	GO:0003677(DNA binding)//GO:0005496(steroid binding)//GO:0030284(estrogen receptor activity)//GO:0003707(steroid hormone receptor activity)//GO:0008270(zinc ion binding)//GO:0003700(DNA-binding transcription factor activity)//GO:0043565(sequence-specific DNA binding)//GO:0046872(metal ion binding)//GO:0005515(protein binding)//GO:0008289(lipid binding)//GO:0042802(identical protein binding)//GO:0…
ENSG00000092009	7.53091	2.91282	0.00250381	0.0128889	up	11	2	0.233025	-1.86302	chr14	24505353	24508265	-	chr14:24505353-24508265	CMA1	protein_coding	1215	CYH|MCT1|chymase	MIM:118938|HGNC:HGNC:2097|Ensembl:ENSG00000092009	14q12	chymase 1	hsa04614(Renin-angiotensin system)//hsa05415(Diabetic cardiomyopathy)	GO:0006508(proteolysis)//GO:0022617(extracellular matrix disassembly)//GO:0050727(regulation of inflammatory response)//GO:0002003(angiotensin maturation)//GO:0006518(peptide metabolic process)//GO:0030901(midbrain development)//GO:0034769(basement membrane disassembly)//GO:0045766(positive regulation of angiogenesis)//GO:0071333(cellular response to glucose stimulus)//GO:0140447(cytokine precurs…	GO:0005829(cytosol)//GO:0005576(extracellular region)//GO:0036464(cytoplasmic ribonucleoprotein granule)//GO:0005615(extracellular space)//GO:0062023(collagen-containing extracellular matrix)//GO:0030141(secretory granule)	GO:0004252(serine-type endopeptidase activity)//GO:0008233(peptidase activity)//GO:0016787(hydrolase activity)//GO:0008236(serine-type peptidase activity)//GO:0042277(peptide binding)
ENSG00000092051	59.9748	5.90628	0.0172979	0.0626804	up	6	0	-0.498824	-2.77056	chr14	23568035	23578790	-	chr14:23568035-23578790	JPH4	protein_coding	84502	JP4|JPHL1	HGNC:HGNC:20156|Ensembl:ENSG00000092051	14q11.2	junctophilin 4		GO:0001817(regulation of cytokine production)//GO:0007612(learning)//GO:0048167(regulation of synaptic plasticity)//GO:0050885(neuromuscular process controlling balance)//GO:2001256(regulation of store-operated calcium entry)//GO:0060314(regulation of ryanodine-sensitive calcium-release channel activity)//GO:0060402(calcium ion transport into cytosol)	GO:0030314(junctional membrane complex)//GO:0016020(membrane)//GO:0016021(integral component of membrane)//GO:0005783(endoplasmic reticulum)//GO:0005789(endoplasmic reticulum membrane)//GO:0005886(plasma membrane)//GO:0005790(smooth endoplasmic reticulum)//GO:0043198(dendritic shaft)//GO:0014701(junctional sarcoplasmic reticulum membrane)	GO:0005515(protein binding)
ENSG00000092054	138.608	7.11486	5.32834e-05	0.000501243	up	14	0	0.541877	-2.77056	chr14	23412740	23435660	-	chr14:23412740-23435660	MYH7	protein_coding	4625	CMD1S|CMH1|MPD1|MYHCB|SPMD|SPMM	MIM:160760|HGNC:HGNC:7577|Ensembl:ENSG00000092054	14q11.2	myosin heavy chain 7	hsa04022(cGMP-PKG signaling pathway)//hsa04260(Cardiac muscle contraction)//hsa04261(Adrenergic signaling in cardiomyocytes)//hsa04919(Thyroid hormone signaling pathway)//hsa05410(Hypertrophic cardiomyopathy)//hsa05414(Dilated cardiomyopathy)//hsa05416(Viral myocarditis)	GO:0060048(cardiac muscle contraction)//GO:0055010(ventricular cardiac muscle tissue morphogenesis)//GO:0003009(skeletal muscle contraction)//GO:0006941(striated muscle contraction)//GO:0046034(ATP metabolic process)//GO:0002026(regulation of the force of heart contraction)//GO:0002027(regulation of heart rate)//GO:0006936(muscle contraction)//GO:0007512(adult heart development)//GO:0014728(regul…	GO:0016459(myosin complex)//GO:0005737(cytoplasm)//GO:0030017(sarcomere)//GO:0030016(myofibril)//GO:0032982(myosin filament)//GO:0005859(muscle myosin complex)//GO:0001725(stress fiber)//GO:0030018(Z disc)	GO:0005524(ATP binding)//GO:0005515(protein binding)//GO:0051015(actin filament binding)//GO:0003774(motor activity)//GO:0000166(nucleotide binding)//GO:0003779(actin binding)//GO:0005516(calmodulin binding)//GO:0000146(microfilament motor activity)//GO:0016887(ATPase activity)//GO:0030898(actin-dependent ATPase activity)
ENSG00000092607	2.87364	1.52288	1.32191e-07	2.67563e-06	up	154	78	3.86285	2.36521	chr1	118883046	118989556	-	chr1:118883046-118989556	TBX15	protein_coding	6913	TBX14	MIM:604127|HGNC:HGNC:11594|Ensembl:ENSG00000092607	1p12	T-box transcription factor 15		GO:0006355(regulation of transcription, DNA-templated)//GO:0006357(regulation of transcription by RNA polymerase II)//GO:0001708(cell fate specification)//GO:0000122(negative regulation of transcription by RNA polymerase II)//GO:0048701(embryonic cranial skeleton morphogenesis)//GO:0048704(embryonic skeletal system morphogenesis)	GO:0005634(nucleus)//GO:0000785(chromatin)//GO:0090571(RNA polymerase II transcription repressor complex)	GO:0003700(DNA-binding transcription factor activity)//GO:0003677(DNA binding)//GO:0005515(protein binding)//GO:0000981(DNA-binding transcription factor activity, RNA polymerase II-specific)//GO:0000978(RNA polymerase II cis-regulatory region sequence-specific DNA binding)//GO:1990837(sequence-specific double-stranded DNA binding)//GO:0000976(transcription regulatory region sequence-specific DNA …
ENSG00000093072	3.99328	1.99757	5.54328e-16	7.95082e-14	up	436	159	5.35482	3.37163	chr22	17178790	17258235	-	chr22:17178790-17258235	ADA2	protein_coding	51816	ADGF|CECR1|IDGFL|PAN|SNEDS|VAIHS	MIM:607575|HGNC:HGNC:1839|Ensembl:ENSG00000093072	22q11.1	adenosine deaminase 2	hsa00230(Purine metabolism)//hsa01100(Metabolic pathways)	GO:0006154(adenosine catabolic process)//GO:0007165(signal transduction)//GO:0007275(multicellular organism development)//GO:0044267(cellular protein metabolic process)//GO:0043312(neutrophil degranulation)//GO:0046103(inosine biosynthetic process)	GO:0005615(extracellular space)//GO:0005576(extracellular region)//GO:0035578(azurophil granule lumen)	GO:0019239(deaminase activity)//GO:0004000(adenosine deaminase activity)//GO:0046872(metal ion binding)//GO:0016787(hydrolase activity)//GO:0008270(zinc ion binding)//GO:0008083(growth factor activity)//GO:0042803(protein homodimerization activity)//GO:0008201(heparin binding)//GO:0043394(proteoglycan binding)//GO:0031685(adenosine receptor binding)
ENSG00000095303	2.02885	1.02066	4.22055e-06	5.65491e-05	up	770	553	6.17311	5.15526	chr9	122370530	122395703	+	chr9:122370530-122395703	PTGS1	protein_coding	5742	COX1|COX3|PCOX1|PES-1|PGG/HS|PGHS-1|PGHS1|PHS1|PTGHS	MIM:176805|HGNC:HGNC:9604|Ensembl:ENSG00000095303	9q33.2	prostaglandin-endoperoxide synthase 1	hsa00590(Arachidonic acid metabolism)//hsa01100(Metabolic pathways)//hsa04611(Platelet activation)//hsa04726(Serotonergic synapse)//hsa04923(Regulation of lipolysis in adipocytes)	GO:0006954(inflammatory response)//GO:0055114(oxidation-reduction process)//GO:0008217(regulation of blood pressure)//GO:0006979(response to oxidative stress)//GO:0001516(prostaglandin biosynthetic process)//GO:0019371(cyclooxygenase pathway)//GO:0098869(cellular oxidant detoxification)//GO:0006629(lipid metabolic process)//GO:0006631(fatty acid metabolic process)//GO:0006633(fatty acid biosynthe…	GO:0005737(cytoplasm)//GO:0016020(membrane)//GO:0005794(Golgi apparatus)//GO:0043231(intracellular membrane-bounded organelle)//GO:0005783(endoplasmic reticulum)//GO:0005789(endoplasmic reticulum membrane)//GO:0031090(organelle membrane)//GO:0070062(extracellular exosome)//GO:0001750(photoreceptor outer segment)	GO:0020037(heme binding)//GO:0004601(peroxidase activity)//GO:0004666(prostaglandin-endoperoxide synthase activity)//GO:0046872(metal ion binding)//GO:0016491(oxidoreductase activity)//GO:0051213(dioxygenase activity)//GO:0005515(protein binding)
ENSG00000095370	2.02178	1.01563	3.00298e-05	0.00030593	up	297	214	4.80337	3.79496	chr9	127738317	127778710	-	chr9:127738317-127778710	SH2D3C	protein_coding	10044	CHAT|NSP3|PRO34088|SHEP1	MIM:604722|HGNC:HGNC:16884|Ensembl:ENSG00000095370	9q34.11	SH2 domain containing 3C		GO:0007264(small GTPase mediated signal transduction)//GO:0050790(regulation of catalytic activity)//GO:0033138(positive regulation of peptidyl-serine phosphorylation)//GO:0007254(JNK cascade)	GO:0005737(cytoplasm)//GO:0016020(membrane)//GO:0005886(plasma membrane)//GO:0042995(cell projection)//GO:0030424(axon)//GO:0032587(ruffle membrane)	GO:0005085(guanyl-nucleotide exchange factor activity)//GO:0005515(protein binding)//GO:0001784(phosphotyrosine residue binding)
ENSG00000095397	9.09609	3.18525	5.33141e-11	2.75369e-09	up	57	9	2.45348	-0.465675	chr9	114402080	114505473	-	chr9:114402080-114505473	WHRN	protein_coding	25861	CIP98|DFNB31|PDZD7B|USH2D|WI	MIM:607928|HGNC:HGNC:16361|Ensembl:ENSG00000095397	9q32	whirlin		GO:0050953(sensory perception of light stimulus)//GO:0007605(sensory perception of sound)//GO:0001895(retina homeostasis)//GO:0060122(inner ear receptor cell stereocilium organization)//GO:0045184(establishment of protein localization)//GO:0050910(detection of mechanical stimulus involved in sensory perception of sound)//GO:0060088(auditory receptor cell stereocilium organization)//GO:0010628(pos…	GO:0005737(cytoplasm)//GO:0030054(cell junction)//GO:0042995(cell projection)//GO:0045202(synapse)//GO:0005886(plasma membrane)//GO:0030426(growth cone)//GO:0001917(photoreceptor inner segment)//GO:0032420(stereocilium)//GO:0032426(stereocilium tip)//GO:0032391(photoreceptor connecting cilium)//GO:0043025(neuronal cell body)//GO:0002141(stereocilia ankle link)//GO:0002142(stereocilia ankle link c…	GO:0005515(protein binding)//GO:0042802(identical protein binding)
ENSG00000095585	2.0198	1.01422	0.00918629	0.0376072	up	50	36	2.26984	1.29683	chr10	96189171	96271587	-	chr10:96189171-96271587	BLNK	protein_coding	29760	AGM4|BASH|BLNK-S|LY57|SLP-65|SLP65|bca	MIM:604515|HGNC:HGNC:14211|Ensembl:ENSG00000095585	10q24.1	B cell linker	hsa04064(NF-kappa B signaling pathway)//hsa04380(Osteoclast differentiation)//hsa04662(B cell receptor signaling pathway)//hsa05169(Epstein-Barr virus infection)//hsa05340(Primary immunodeficiency)	GO:0035556(intracellular signal transduction)//GO:0042113(B cell activation)//GO:0006954(inflammatory response)//GO:0050853(B cell receptor signaling pathway)//GO:0007169(transmembrane receptor protein tyrosine kinase signaling pathway)//GO:0030183(B cell differentiation)//GO:0006959(humoral immune response)//GO:0010628(positive regulation of gene expression)	GO:0005737(cytoplasm)//GO:0016020(membrane)//GO:0005886(plasma membrane)//GO:0005829(cytosol)//GO:0036464(cytoplasmic ribonucleoprotein granule)	GO:0005515(protein binding)//GO:0042169(SH2 domain binding)//GO:0019899(enzyme binding)//GO:1990782(protein tyrosine kinase binding)//GO:0005068(transmembrane receptor protein tyrosine kinase adaptor activity)//GO:0035591(signaling adaptor activity)
ENSG00000095587	3.05857	1.61286	0.0143062	0.0541321	up	17	8	0.796127	-0.599558	chr10	96364608	96513926	-	chr10:96364608-96513926	TLL2	protein_coding	7093	-	MIM:606743|HGNC:HGNC:11844|Ensembl:ENSG00000095587	10q24.1	tolloid like 2		GO:0006508(proteolysis)//GO:0007275(multicellular organism development)//GO:0030154(cell differentiation)//GO:0022617(extracellular matrix disassembly)//GO:0048632(negative regulation of skeletal muscle tissue growth)	GO:0005576(extracellular region)	GO:0008270(zinc ion binding)//GO:0005509(calcium ion binding)//GO:0008237(metallopeptidase activity)//GO:0004222(metalloendopeptidase activity)//GO:0046872(metal ion binding)//GO:0008233(peptidase activity)//GO:0016787(hydrolase activity)
ENSG00000095637	9.93601	3.31267	4.82185e-08	1.13231e-06	up	35	5	1.77393	-1.09718	chr10	95311771	95561414	-	chr10:95311771-95561414	SORBS1	protein_coding	10580	CAP|FLAF2|R85FL|SH3D5|SH3P12|SORB1	MIM:605264|HGNC:HGNC:14565|Ensembl:ENSG00000095637	10q24.1	sorbin and SH3 domain containing 1	hsa03320(PPAR signaling pathway)//hsa04520(Adherens junction)//hsa04910(Insulin signaling pathway)	GO:0046326(positive regulation of glucose import)//GO:1903078(positive regulation of protein localization to plasma membrane)//GO:0032869(cellular response to insulin stimulus)//GO:0043149(stress fiber assembly)//GO:0048041(focal adhesion assembly)//GO:0008286(insulin receptor signaling pathway)//GO:0006936(muscle contraction)//GO:0046628(positive regulation of insulin receptor signaling pathway)…	GO:0005634(nucleus)//GO:0005737(cytoplasm)//GO:0016020(membrane)//GO:0005886(plasma membrane)//GO:0005856(cytoskeleton)//GO:0005925(focal adhesion)//GO:0005912(adherens junction)//GO:0030054(cell junction)//GO:0045121(membrane raft)//GO:0005813(centrosome)//GO:0016363(nuclear matrix)//GO:0005829(cytosol)//GO:0001725(stress fiber)//GO:0030055(cell-substrate junction)//GO:0005915(zonula adherens)	GO:0005515(protein binding)//GO:0003779(actin binding)//GO:0030159(signaling receptor complex adaptor activity)//GO:0005158(insulin receptor binding)//GO:0008092(cytoskeletal protein binding)
ENSG00000095777	89.4622	6.48321	0.00242129	0.0125332	up	9	0	-0.0170497	-2.77056	chr10	25934229	26212532	+	chr10:25934229-26212532	MYO3A	protein_coding	53904	DFNB30	MIM:606808|HGNC:HGNC:7601|Ensembl:ENSG00000095777	10p12.1	myosin IIIA		GO:0006468(protein phosphorylation)//GO:0016310(phosphorylation)//GO:0007605(sensory perception of sound)//GO:0007601(visual perception)//GO:0050896(response to stimulus)//GO:0046777(protein autophosphorylation)//GO:0090103(cochlea morphogenesis)	GO:0016459(myosin complex)//GO:0005737(cytoplasm)//GO:0005856(cytoskeleton)//GO:0030175(filopodium)//GO:0042995(cell projection)//GO:0032420(stereocilium)//GO:0032433(filopodium tip)//GO:0031941(filamentous actin)//GO:0032426(stereocilium tip)	GO:0005524(ATP binding)//GO:0005515(protein binding)//GO:0004672(protein kinase activity)//GO:0003774(motor activity)//GO:0000166(nucleotide binding)//GO:0004674(protein serine/threonine kinase activity)//GO:0016301(kinase activity)//GO:0016740(transferase activity)//GO:0003779(actin binding)//GO:0005516(calmodulin binding)//GO:0000146(microfilament motor activity)//GO:0030898(actin-dependent ATP…
ENSG00000096093	2.40842	1.26809	3.75459e-08	9.21615e-07	up	529	320	5.63285	4.37037	chr6	52362123	52529886	+	chr6:52362123-52529886	EFHC1	protein_coding	114327	EJM1|POC9|RIB72|dJ304B14.2	MIM:608815|HGNC:HGNC:16406|Ensembl:ENSG00000096093	6p12.2	EF-hand domain containing 1		GO:0000281(mitotic cytokinesis)//GO:0051302(regulation of cell division)//GO:0060285(cilium-dependent cell motility)//GO:0007052(mitotic spindle organization)//GO:0021795(cerebral cortex cell migration)	GO:0005737(cytoplasm)//GO:0005856(cytoskeleton)//GO:0005815(microtubule organizing center)//GO:0005819(spindle)//GO:0000922(spindle pole)//GO:0005813(centrosome)//GO:0072686(mitotic spindle)//GO:0005930(axoneme)//GO:0043025(neuronal cell body)	GO:0005509(calcium ion binding)//GO:0005515(protein binding)//GO:0043014(alpha-tubulin binding)//GO:0008022(protein C-terminus binding)
ENSG00000096696	3.59022	1.84407	9.41362e-06	0.000113539	up	52	21	2.32473	0.579417	chr6	7541617	7586714	+	chr6:7541617-7586714	DSP	protein_coding	1832	DCWHKTA|DP	MIM:125647|HGNC:HGNC:3052|Ensembl:ENSG00000096696	6p24.3	desmoplakin	hsa05412(Arrhythmogenic right ventricular cardiomyopathy)	GO:0098609(cell-cell adhesion)//GO:0045104(intermediate filament cytoskeleton organization)//GO:0031424(keratinization)//GO:0042060(wound healing)//GO:0043312(neutrophil degranulation)//GO:0030216(keratinocyte differentiation)//GO:0008544(epidermis development)//GO:0086091(regulation of heart rate by cardiac conduction)//GO:0070268(cornification)//GO:0018149(peptide cross-linking)//GO:0043588(ski…	GO:0005856(cytoskeleton)//GO:0030054(cell junction)//GO:0005634(nucleus)//GO:0005737(cytoplasm)//GO:0016020(membrane)//GO:0005886(plasma membrane)//GO:0030057(desmosome)//GO:0070062(extracellular exosome)//GO:0005882(intermediate filament)//GO:0014704(intercalated disc)//GO:0101003(ficolin-1-rich granule membrane)//GO:0001533(cornified envelope)//GO:0005911(cell-cell junction)//GO:0005916(fascia …	GO:0005515(protein binding)//GO:0050839(cell adhesion molecule binding)//GO:0003723(RNA binding)//GO:0005198(structural molecule activity)//GO:0005200(structural constituent of cytoskeleton)//GO:0097110(scaffold protein binding)//GO:0005080(protein kinase C binding)//GO:0086083(cell adhesive protein binding involved in bundle of His cell-Purkinje myocyte communication)
ENSG00000099204	5.46952	2.45142	3.82351e-08	9.35329e-07	up	53	14	2.35142	0.0635202	chr10	114431113	114768061	-	chr10:114431113-114768061	ABLIM1	protein_coding	3983	ABLIM|LIMAB1|LIMATIN|abLIM-1	MIM:602330|HGNC:HGNC:78|Ensembl:ENSG00000099204	10q25.3	actin binding LIM protein 1	hsa04360(Axon guidance)	GO:0007010(cytoskeleton organization)//GO:0060271(cilium assembly)//GO:0007601(visual perception)//GO:0009887(animal organ morphogenesis)//GO:0030032(lamellipodium assembly)	GO:0005737(cytoplasm)//GO:0005856(cytoskeleton)//GO:0015629(actin cytoskeleton)//GO:0001725(stress fiber)//GO:0030027(lamellipodium)	GO:0003779(actin binding)//GO:0046872(metal ion binding)//GO:0005515(protein binding)//GO:0051015(actin filament binding)
ENSG00000099282	6.55365	2.7123	1.29564e-13	1.19589e-11	up	104	23	3.30347	0.698305	chr10	69451465	69507666	+	chr10:69451465-69507666	TSPAN15	protein_coding	23555	2700063A19Rik|NET-7|NET7|TM4SF15	MIM:613140|HGNC:HGNC:23298|Ensembl:ENSG00000099282	10q22.1	tetraspanin 15		GO:0044267(cellular protein metabolic process)//GO:0051604(protein maturation)//GO:0072659(protein localization to plasma membrane)//GO:0045746(negative regulation of Notch signaling pathway)	GO:0016021(integral component of membrane)//GO:0016020(membrane)//GO:0043231(intracellular membrane-bounded organelle)//GO:0005829(cytosol)//GO:0005886(plasma membrane)//GO:0005768(endosome)//GO:0016604(nuclear body)//GO:0030054(cell junction)//GO:0031902(late endosome membrane)//GO:0005887(integral component of plasma membrane)//GO:0005788(endoplasmic reticulum lumen)//GO:0009986(cell surface)//…	GO:0005515(protein binding)//GO:0019899(enzyme binding)
ENSG00000099330	2.29044	1.19562	0.00105353	0.00633036	up	63	40	2.59418	1.4402	chr19	17226213	17229219	+	chr19:17226213-17229219	OCEL1	protein_coding	79629	FWP009|S863-9	HGNC:HGNC:26221|Ensembl:ENSG00000099330	19p13.11	occludin/ELL domain containing 1			GO:0016020(membrane)//GO:0016021(integral component of membrane)
ENSG00000099338	3.69608	1.886	6.3245e-06	8.03643e-05	up	51	20	2.29754	0.516085	chr19	38335775	38370943	+	chr19:38335775-38370943	CATSPERG	protein_coding	57828	C19orf15	MIM:613452|HGNC:HGNC:25243|Ensembl:ENSG00000099338	19q13.2	cation channel sperm associated auxiliary subunit gamma		GO:0007275(multicellular organism development)//GO:0030154(cell differentiation)//GO:0007283(spermatogenesis)//GO:0035036(sperm-egg recognition)//GO:0032570(response to progesterone)	GO:0036128(CatSper complex)//GO:0097228(sperm principal piece)//GO:0016020(membrane)//GO:0016021(integral component of membrane)//GO:0005886(plasma membrane)//GO:0031514(motile cilium)
ENSG00000099365	3.17772	1.66799	6.0492e-06	7.74088e-05	up	70	32	2.74268	1.13762	chr16	30989256	31010638	-	chr16:30989256-31010638	STX1B	protein_coding	112755	GEFSP9|STX1B1|STX1B2	MIM:601485|HGNC:HGNC:18539|Ensembl:ENSG00000099365	16p11.2	syntaxin 1B	hsa04130(SNARE interactions in vesicular transport)//hsa04721(Synaptic vesicle cycle)	GO:0006886(intracellular protein transport)//GO:0016192(vesicle-mediated transport)//GO:0017157(regulation of exocytosis)//GO:0006836(neurotransmitter transport)//GO:0006887(exocytosis)//GO:0006906(vesicle fusion)//GO:0031629(synaptic vesicle fusion to presynaptic active zone membrane)//GO:2000463(positive regulation of excitatory postsynaptic potential)//GO:0048278(vesicle docking)//GO:0010977(n…	GO:0016021(integral component of membrane)//GO:0016020(membrane)//GO:0005634(nucleus)//GO:0005737(cytoplasm)//GO:0005856(cytoskeleton)//GO:0005815(microtubule organizing center)//GO:0005819(spindle)//GO:0005886(plasma membrane)//GO:0005829(cytosol)//GO:0012505(endomembrane system)//GO:0031201(SNARE complex)//GO:0008021(synaptic vesicle)//GO:0048787(presynaptic active zone membrane)//GO:0030424(ax…	GO:0005484(SNAP receptor activity)//GO:0000149(SNARE binding)//GO:0005515(protein binding)//GO:0019901(protein kinase binding)//GO:0005102(signaling receptor binding)//GO:0019904(protein domain specific binding)
ENSG00000099377	2.33683	1.22455	0.0124967	0.0485383	up	29	18	1.51536	0.380416	chr16	30985207	30989147	+	chr16:30985207-30989147	HSD3B7	protein_coding	80270	CBAS1|PFIC4|SDR11E3	MIM:607764|HGNC:HGNC:18324|Ensembl:ENSG00000099377	16p11.2	hydroxy-delta-5-steroid dehydrogenase, 3 beta- and steroid delta-isomerase 7	hsa00120(Primary bile acid biosynthesis)//hsa01100(Metabolic pathways)	GO:0055114(oxidation-reduction process)//GO:0006694(steroid biosynthetic process)//GO:0035754(B cell chemotaxis)//GO:0006699(bile acid biosynthetic process)	GO:0016020(membrane)//GO:0016021(integral component of membrane)//GO:0005783(endoplasmic reticulum)//GO:0005789(endoplasmic reticulum membrane)//GO:0005811(lipid droplet)	GO:0016616(oxidoreductase activity, acting on the CH-OH group of donors, NAD or NADP as acceptor)//GO:0003854(3-beta-hydroxy-delta5-steroid dehydrogenase activity)//GO:0016491(oxidoreductase activity)//GO:0005515(protein binding)//GO:0047016(cholest-5-ene-3-beta,7-alpha-diol 3-beta-dehydrogenase activity)
ENSG00000099810	187.753	7.5527	1.3552e-06	2.08638e-05	up	19	0	0.943718	-2.77056	chr9	21802636	21937651	+	chr9:21802636-21937651	MTAP	protein_coding	4507	BDMF|DMSFH|DMSMFH|HEL-249|LGMBF|MSAP|c86fus	MIM:156540|HGNC:HGNC:7413|Ensembl:ENSG00000099810	9p21.3	methylthioadenosine phosphorylase	hsa00270(Cysteine and methionine metabolism)//hsa01100(Metabolic pathways)	GO:0009116(nucleoside metabolic process)//GO:0006166(purine ribonucleoside salvage)//GO:0019509(L-methionine salvage from methylthioadenosine)//GO:0006139(nucleobase-containing compound metabolic process)//GO:0035722(interleukin-12-mediated signaling pathway)//GO:0033574(response to testosterone)	GO:0005634(nucleus)//GO:0005737(cytoplasm)//GO:0005654(nucleoplasm)//GO:0005829(cytosol)//GO:0070062(extracellular exosome)	GO:0003824(catalytic activity)//GO:0016763(transferase activity, transferring pentosyl groups)//GO:0017061(S-methyl-5-thioadenosine phosphorylase activity)//GO:0016740(transferase activity)//GO:0016757(transferase activity, transferring glycosyl groups)//GO:0005515(protein binding)//GO:0004645(1,4-alpha-oligoglucan phosphorylase activity)//GO:0004731(purine-nucleoside phosphorylase activity)
ENSG00000099864	5.63953	2.49557	4.8663e-10	1.96794e-08	up	74	19	2.82114	0.449844	chr19	708935	748329	+	chr19:708935-748329	PALM	protein_coding	5064	PALM1	MIM:608134|HGNC:HGNC:8594|Ensembl:ENSG00000099864	19p13.3	paralemmin		GO:0008360(regulation of cell shape)//GO:0051491(positive regulation of filopodium assembly)//GO:0007194(negative regulation of adenylate cyclase activity)//GO:0060160(negative regulation of dopamine receptor signaling pathway)//GO:0007010(cytoskeleton organization)//GO:0007193(adenylate cyclase-inhibiting G protein-coupled receptor signaling pathway)//GO:0008104(protein localization)//GO:0060074…	GO:0016020(membrane)//GO:0005654(nucleoplasm)//GO:0005886(plasma membrane)//GO:0030054(cell junction)//GO:0042995(cell projection)//GO:0030425(dendrite)//GO:0045202(synapse)//GO:0030424(axon)//GO:0016323(basolateral plasma membrane)//GO:0043197(dendritic spine)//GO:0016327(apicolateral plasma membrane)//GO:0031235(intrinsic component of the cytoplasmic side of the plasma membrane)//GO:0031410(cyt…	GO:0005515(protein binding)//GO:0031750(D3 dopamine receptor binding)
ENSG00000099992	2.10043	1.07069	0.00483422	0.0221461	up	52	36	2.32473	1.29683	chr22	30291990	30326947	-	chr22:30291990-30326947	TBC1D10A	protein_coding	83874	EPI64|TBC1D10|dJ130H16.1|dJ130H16.2	MIM:610020|HGNC:HGNC:23609|Ensembl:ENSG00000099992	22q12.2	TBC1 domain family member 10A		GO:0006886(intracellular protein transport)//GO:0090630(activation of GTPase activity)//GO:0042147(retrograde transport, endosome to Golgi)//GO:0045862(positive regulation of proteolysis)//GO:0097202(activation of cysteine-type endopeptidase activity)	GO:0005886(plasma membrane)//GO:0042995(cell projection)//GO:0005829(cytosol)//GO:0005902(microvillus)//GO:0070062(extracellular exosome)	GO:0005085(guanyl-nucleotide exchange factor activity)//GO:0005515(protein binding)//GO:0005096(GTPase activator activity)//GO:0031267(small GTPase binding)//GO:0045296(cadherin binding)//GO:0030165(PDZ domain binding)
ENSG00000099998	14.0877	3.81637	3.93459e-10	1.66195e-08	up	40	4	1.95883	-1.31025	chr22	24219654	24245108	-	chr22:24219654-24245108	GGT5	protein_coding	2687	GGL|GGT 5|GGT-REL|GGTLA1	MIM:137168|HGNC:HGNC:4260|Ensembl:ENSG00000099998	22q11.23	gamma-glutamyltransferase 5	hsa00430(Taurine and hypotaurine metabolism)//hsa00480(Glutathione metabolism)//hsa00590(Arachidonic acid metabolism)//hsa01100(Metabolic pathways)	GO:0006751(glutathione catabolic process)//GO:0006508(proteolysis)//GO:0018215(protein phosphopantetheinylation)//GO:0019370(leukotriene biosynthetic process)//GO:0006750(glutathione biosynthetic process)//GO:0032496(response to lipopolysaccharide)//GO:0007283(spermatogenesis)//GO:1901750(leukotriene D4 biosynthetic process)//GO:0032355(response to estradiol)//GO:0006954(inflammatory response)//G…	GO:0016020(membrane)//GO:0016021(integral component of membrane)//GO:0005886(plasma membrane)//GO:0031226(intrinsic component of plasma membrane)	GO:0036374(glutathione hydrolase activity)//GO:0016740(transferase activity)//GO:0008233(peptidase activity)//GO:0016787(hydrolase activity)//GO:0016746(transferase activity, transferring acyl groups)//GO:0000048(peptidyltransferase activity)//GO:0002951(leukotriene-C(4) hydrolase)//GO:0102953(hypoglycin A gamma-glutamyl transpeptidase activity)//GO:0103068(leukotriene C4 gamma-glutamyl transfera…
ENSG00000100012	69.8039	6.12524	0.00894141	0.0368468	up	7	0	-0.319755	-2.77056	chr22	30447959	30472017	-	chr22:30447959-30472017	SEC14L3	protein_coding	266629	TAP2	MIM:612824|HGNC:HGNC:18655|Ensembl:ENSG00000100012	22q12.2	SEC14 like lipid binding 3			GO:0070062(extracellular exosome)	GO:0008289(lipid binding)
ENSG00000100024	7.59497	2.92504	5.5925e-10	2.22995e-08	up	58	11	2.4779	-0.230255	chr22	24494107	24528390	+	chr22:24494107-24528390	UPB1	protein_coding	51733	BUP1	MIM:606673|HGNC:HGNC:16297|Ensembl:ENSG00000100024	22q11.23	beta-ureidopropionase 1	hsa00240(Pyrimidine metabolism)//hsa00410(beta-Alanine metabolism)//hsa00770(Pantothenate and CoA biosynthesis)//hsa00983(Drug metabolism - other enzymes)//hsa01100(Metabolic pathways)	GO:0006807(nitrogen compound metabolic process)//GO:0046050(UMP catabolic process)//GO:0046079(dUMP catabolic process)//GO:0051260(protein homooligomerization)//GO:0051289(protein homotetramerization)//GO:0046135(pyrimidine nucleoside catabolic process)//GO:0019483(beta-alanine biosynthetic process)//GO:0033396(beta-alanine biosynthetic process via 3-ureidopropionate)	GO:0005737(cytoplasm)//GO:0005829(cytosol)//GO:0070062(extracellular exosome)	GO:0016787(hydrolase activity)//GO:0042803(protein homodimerization activity)//GO:0003837(beta-ureidopropionase activity)//GO:0016811(hydrolase activity, acting on carbon-nitrogen (but not peptide) bonds, in linear amides)
ENSG00000100027	2.54073	1.34524	0.00196109	0.0105986	up	42	24	2.02662	0.754266	chr22	21697536	21735794	-	chr22:21697536-21735794	YPEL1	protein_coding	29799	FKSG3	MIM:608082|HGNC:HGNC:12845|Ensembl:ENSG00000100027	22q11.21-q11.22	yippee like 1			GO:0005634(nucleus)	GO:0046872(metal ion binding)
ENSG00000100031	2.4795	1.31005	0.000563342	0.00369939	up	58	34	2.4779	1.21942	chr22	24594811	24629005	+	chr22:24594811-24629005	GGT1	protein_coding	2678	CD224|D22S672|D22S732|GGT|GGT 1|GGTD|GTG	MIM:612346|HGNC:HGNC:4250|Ensembl:ENSG00000100031|Ensembl:ENSG00000286070	22q11.23	gamma-glutamyltransferase 1	hsa00430(Taurine and hypotaurine metabolism)//hsa00480(Glutathione metabolism)//hsa00590(Arachidonic acid metabolism)//hsa01100(Metabolic pathways)	GO:0006751(glutathione catabolic process)//GO:0006508(proteolysis)//GO:0018215(protein phosphopantetheinylation)//GO:0006629(lipid metabolic process)//GO:0007283(spermatogenesis)//GO:0006750(glutathione biosynthetic process)//GO:0032496(response to lipopolysaccharide)//GO:0006805(xenobiotic metabolic process)//GO:1901750(leukotriene D4 biosynthetic process)//GO:0032355(response to estradiol)//GO:…	GO:0016020(membrane)//GO:0016021(integral component of membrane)//GO:0005886(plasma membrane)//GO:0005615(extracellular space)//GO:0070062(extracellular exosome)	GO:0036374(glutathione hydrolase activity)//GO:0016740(transferase activity)//GO:0008233(peptidase activity)//GO:0016787(hydrolase activity)//GO:0016746(transferase activity, transferring acyl groups)//GO:0005515(protein binding)//GO:0000048(peptidyltransferase activity)//GO:0002951(leukotriene-C(4) hydrolase)//GO:0102953(hypoglycin A gamma-glutamyl transpeptidase activity)//GO:0103068(leukotrien…
ENSG00000100033	2.90328	1.53768	0.000202378	0.00155664	up	50	25	2.26984	0.808137	chr22	18912777	18936553	-	chr22:18912777-18936553	PRODH	protein_coding	5625	HSPOX2|PIG6|POX|PRODH1|PRODH2|TP53I6	MIM:606810|HGNC:HGNC:9453|Ensembl:ENSG00000100033	22q11.21	proline dehydrogenase 1	hsa00330(Arginine and proline metabolism)//hsa01100(Metabolic pathways)	GO:0006562(proline catabolic process)//GO:0055114(oxidation-reduction process)//GO:0006560(proline metabolic process)//GO:0010133(proline catabolic process to glutamate)//GO:0008631(intrinsic apoptotic signaling pathway in response to oxidative stress)//GO:0010942(positive regulation of cell death)//GO:0019470(4-hydroxyproline catabolic process)	GO:0043231(intracellular membrane-bounded organelle)//GO:0005654(nucleoplasm)//GO:0005739(mitochondrion)//GO:0005759(mitochondrial matrix)//GO:0005743(mitochondrial inner membrane)	GO:0004657(proline dehydrogenase activity)//GO:0016491(oxidoreductase activity)//GO:0071949(FAD binding)
ENSG00000100055	2.25485	1.17303	4.55986e-08	1.08097e-06	up	1648	1065	7.26933	6.09791	chr22	37282027	37315341	+	chr22:37282027-37315341	CYTH4	protein_coding	27128	CYT4|DJ63G5.1|PSCD4|cytohesin-4	MIM:606514|HGNC:HGNC:9505|Ensembl:ENSG00000100055	22q13.1	cytohesin 4	hsa04072(Phospholipase D signaling pathway)//hsa04144(Endocytosis)//hsa05130(Pathogenic Escherichia coli infection)//hsa05131(Shigellosis)//hsa05132(Salmonella infection)	GO:0032012(regulation of ARF protein signal transduction)//GO:0050790(regulation of catalytic activity)	GO:0005829(cytosol)//GO:0005886(plasma membrane)//GO:0045171(intercellular bridge)//GO:0034451(centriolar satellite)//GO:0016020(membrane)//GO:0000139(Golgi membrane)	GO:0005086(ARF guanyl-nucleotide exchange factor activity)//GO:0005085(guanyl-nucleotide exchange factor activity)//GO:0005515(protein binding)//GO:0008289(lipid binding)
ENSG00000100065	187.753	7.5527	1.3552e-06	2.08638e-05	up	19	0	0.943718	-2.77056	chr22	37490362	37519542	-	chr22:37490362-37519542	CARD10	protein_coding	29775	BIMP1|CARMA3	MIM:607209|HGNC:HGNC:16422|Ensembl:ENSG00000100065	22q13.1	caspase recruitment domain family member 10	hsa04064(NF-kappa B signaling pathway)	GO:0042981(regulation of apoptotic process)//GO:0090051(negative regulation of cell migration involved in sprouting angiogenesis)//GO:0007250(activation of NF-kappaB-inducing kinase activity)//GO:0065003(protein-containing complex assembly)//GO:1900182(positive regulation of protein localization to nucleus)	GO:0005737(cytoplasm)//GO:0032449(CBM complex)	GO:0005515(protein binding)//GO:0030159(signaling receptor complex adaptor activity)//GO:0050700(CARD domain binding)
ENSG00000100100	3.9505	1.98203	4.02919e-10	1.69472e-08	up	125	46	3.56522	1.63164	chr22	31281594	31292534	-	chr22:31281594-31292534	PIK3IP1	protein_coding	113791	HGFL|TrIP|hHGFL(S)	MIM:619158|HGNC:HGNC:24942|Ensembl:ENSG00000100100	22q12.2	phosphoinositide-3-kinase interacting protein 1		GO:0006508(proteolysis)//GO:0014067(negative regulation of phosphatidylinositol 3-kinase signaling)//GO:0043553(negative regulation of phosphatidylinositol 3-kinase activity)	GO:0016020(membrane)//GO:0016021(integral component of membrane)//GO:0005886(plasma membrane)	GO:0005515(protein binding)//GO:0004252(serine-type endopeptidase activity)//GO:0036313(phosphatidylinositol 3-kinase catalytic subunit binding)
ENSG00000100122	3.48645	1.80176	0.00662995	0.0286726	up	17	7	0.796127	-0.747149	chr22	26599278	26618027	-	chr22:26599278-26618027	CRYBB1	protein_coding	1414	CATCN3|CTRCT17	MIM:600929|HGNC:HGNC:2397|Ensembl:ENSG00000100122	22q12.1	crystallin beta B1		GO:0007601(visual perception)//GO:0002088(lens development in camera-type eye)		GO:0005212(structural constituent of eye lens)//GO:0005515(protein binding)
ENSG00000100146	2.49764	1.32057	0.00182998	0.00999568	up	43	25	2.05936	0.808137	chr22	37970686	37987422	-	chr22:37970686-37987422	SOX10	protein_coding	6663	DOM|PCWH|WS2E|WS4|WS4C	MIM:602229|HGNC:HGNC:11190|Ensembl:ENSG00000100146	22q13.1	SRY-box transcription factor 10		GO:0045893(positive regulation of transcription, DNA-templated)//GO:0006357(regulation of transcription by RNA polymerase II)//GO:0000122(negative regulation of transcription by RNA polymerase II)//GO:0009653(anatomical structure morphogenesis)//GO:0048484(enteric nervous system development)//GO:0001755(neural crest cell migration)//GO:0022010(central nervous system myelination)//GO:0007422(perip…	GO:0005634(nucleus)//GO:0005737(cytoplasm)//GO:0016020(membrane)//GO:0005654(nucleoplasm)//GO:0005739(mitochondrion)//GO:0005741(mitochondrial outer membrane)//GO:0000785(chromatin)//GO:0031315(extrinsic component of mitochondrial outer membrane)	GO:0003677(DNA binding)//GO:0003700(DNA-binding transcription factor activity)//GO:0005515(protein binding)//GO:0042802(identical protein binding)//GO:0000981(DNA-binding transcription factor activity, RNA polymerase II-specific)//GO:0000978(RNA polymerase II cis-regulatory region sequence-specific DNA binding)//GO:1990837(sequence-specific double-stranded DNA binding)//GO:0001228(DNA-binding tra…
ENSG00000100151	2.18402	1.12698	8.82399e-05	0.000770582	up	138	92	3.70627	2.59711	chr22	38056311	38075701	+	chr22:38056311-38075701	PICK1	protein_coding	9463	PICK|PRKCABP	MIM:605926|HGNC:HGNC:9394|Ensembl:ENSG00000100151	22q13.1	protein interacting with PRKCA 1		GO:0006890(retrograde vesicle-mediated transport, Golgi to endoplasmic reticulum)//GO:0006886(intracellular protein transport)//GO:0006468(protein phosphorylation)//GO:0043113(receptor clustering)//GO:0007205(protein kinase C-activating G protein-coupled receptor signaling pathway)//GO:0042149(cellular response to glucose starvation)//GO:0043046(DNA methylation involved in gamete generation)//GO:…	GO:0005737(cytoplasm)//GO:0016020(membrane)//GO:0005829(cytosol)//GO:0005886(plasma membrane)//GO:0005856(cytoskeleton)//GO:0005794(Golgi apparatus)//GO:0030054(cell junction)//GO:0045202(synapse)//GO:0043005(neuron projection)//GO:0048471(perinuclear region of cytoplasm)//GO:0014069(postsynaptic density)//GO:0030666(endocytic vesicle membrane)//GO:0042734(presynaptic membrane)//GO:0008021(synapt…	GO:0005515(protein binding)//GO:0019904(protein domain specific binding)//GO:0046872(metal ion binding)//GO:0003779(actin binding)//GO:0042802(identical protein binding)//GO:0051015(actin filament binding)//GO:0008022(protein C-terminus binding)//GO:0019899(enzyme binding)//GO:0005102(signaling receptor binding)//GO:0005543(phospholipid binding)//GO:0005080(protein kinase C binding)//GO:0001664(G…
ENSG00000100156	5.44217	2.44418	2.4886e-07	4.66747e-06	up	49	13	2.24158	-0.0279156	chr22	38078134	38084093	-	chr22:38078134-38084093	SLC16A8	protein_coding	23539	MCT3|REMP	MIM:610409|HGNC:HGNC:16270|Ensembl:ENSG00000100156	22q13.1	solute carrier family 16 member 8		GO:0055085(transmembrane transport)//GO:0015718(monocarboxylic acid transport)//GO:0050900(leukocyte migration)//GO:0035873(lactate transmembrane transport)//GO:0006090(pyruvate metabolic process)//GO:0015727(lactate transport)	GO:0016021(integral component of membrane)//GO:0005887(integral component of plasma membrane)//GO:0016020(membrane)//GO:0005886(plasma membrane)//GO:0016324(apical plasma membrane)//GO:0016323(basolateral plasma membrane)	GO:0022857(transmembrane transporter activity)//GO:0008028(monocarboxylic acid transmembrane transporter activity)//GO:0015129(lactate transmembrane transporter activity)//GO:0015293(symporter activity)
ENSG00000100228	3.57947	1.83974	0.0231566	0.0799572	up	15	6	0.631698	-0.911577	chr22	23145366	23165663	+	chr22:23145366-23165663	RAB36	protein_coding	9609	-	MIM:605662|HGNC:HGNC:9775|Ensembl:ENSG00000100228	22q11.23	RAB36, member RAS oncogene family		GO:0015031(protein transport)	GO:0016020(membrane)//GO:0005794(Golgi apparatus)//GO:0000139(Golgi membrane)	GO:0005525(GTP binding)//GO:0003924(GTPase activity)//GO:0000166(nucleotide binding)//GO:0005515(protein binding)
ENSG00000100234	3.71532	1.89349	1.08183e-18	2.56767e-16	up	3850	1510	8.49269	6.60069	chr22	32801705	32863041	+	chr22:32801705-32863041	TIMP3	protein_coding	7078	HSMRK222|K222|K222TA2|SFD	MIM:188826|HGNC:HGNC:11822|Ensembl:ENSG00000100234	22q12.3	TIMP metallopeptidase inhibitor 3	hsa05205(Proteoglycans in cancer)//hsa05206(MicroRNAs in cancer)	GO:0070373(negative regulation of ERK1 and ERK2 cascade)//GO:1904684(negative regulation of metalloendopeptidase activity)//GO:0007601(visual perception)//GO:0050896(response to stimulus)//GO:0010466(negative regulation of peptidase activity)//GO:0010951(negative regulation of endopeptidase activity)//GO:0002576(platelet degranulation)//GO:0009725(response to hormone)//GO:0010033(response to orga…	GO:0005634(nucleus)//GO:0005576(extracellular region)//GO:0005615(extracellular space)//GO:0031012(extracellular matrix)//GO:0062023(collagen-containing extracellular matrix)//GO:0031089(platelet dense granule lumen)	GO:0005515(protein binding)//GO:0008191(metalloendopeptidase inhibitor activity)//GO:0046872(metal ion binding)//GO:0030414(peptidase inhibitor activity)//GO:0004857(enzyme inhibitor activity)//GO:0002020(protease binding)
ENSG00000100246	2.00006	1.00004	0.00699046	0.0299396	up	55	40	2.40335	1.4402	chr22	38778508	38794198	-	chr22:38778508-38794198	DNAL4	protein_coding	10126	MRMV3|PIG27	MIM:610565|HGNC:HGNC:2955|Ensembl:ENSG00000100246	22q13.1	dynein axonemal light chain 4	hsa05014(Amyotrophic lateral sclerosis)//hsa05016(Huntington disease)//hsa05022(Pathways of neurodegeneration - multiple diseases)	GO:0007017(microtubule-based process)//GO:0007018(microtubule-based movement)//GO:2000582(positive regulation of ATP-dependent microtubule motor activity, plus-end-directed)	GO:0030286(dynein complex)//GO:0005737(cytoplasm)//GO:0005856(cytoskeleton)//GO:0005929(cilium)//GO:0042995(cell projection)//GO:0005874(microtubule)//GO:0005886(plasma membrane)	GO:0003774(motor activity)//GO:0005515(protein binding)//GO:0042802(identical protein binding)//GO:0051959(dynein light intermediate chain binding)//GO:0003777(microtubule motor activity)//GO:0045505(dynein intermediate chain binding)
ENSG00000100298	7.06173	2.82002	0.000206996	0.00158239	up	20	4	1.01221	-1.31025	chr22	39097224	39104067	+	chr22:39097224-39104067	APOBEC3H	protein_coding	164668	A3H|ARP-10|ARP10	MIM:610976|HGNC:HGNC:24100|Ensembl:ENSG00000100298	22q13.1	apolipoprotein B mRNA editing enzyme catalytic subunit 3H	hsa05170(Human immunodeficiency virus 1 infection)	GO:0051607(defense response to virus)//GO:0002376(immune system process)//GO:0045087(innate immune response)//GO:0010529(negative regulation of transposition)//GO:0080111(DNA demethylation)//GO:0009972(cytidine deamination)//GO:0016554(cytidine to uridine editing)//GO:0045869(negative regulation of single stranded viral RNA replication via double stranded DNA intermediate)//GO:0070383(DNA cytosin…	GO:0005634(nucleus)//GO:0005737(cytoplasm)//GO:0005654(nucleoplasm)//GO:0005829(cytosol)//GO:0000932(P-body)	GO:0008270(zinc ion binding)//GO:0016787(hydrolase activity)//GO:0003824(catalytic activity)//GO:0046872(metal ion binding)//GO:0005515(protein binding)//GO:0003723(RNA binding)//GO:0004126(cytidine deaminase activity)//GO:0047844(deoxycytidine deaminase activity)
ENSG00000100302	9.01296	3.172	0.0433314	0.131053	up	7	1	-0.319755	-2.24658	chr22	35540831	35553999	+	chr22:35540831-35553999	RASD2	protein_coding	23551	Rhes|TEM2	MIM:612842|HGNC:HGNC:18229|Ensembl:ENSG00000100302	22q12.3	RASD family member 2		GO:0007165(signal transduction)//GO:0043949(regulation of cAMP-mediated signaling)//GO:0051897(positive regulation of protein kinase B signaling)//GO:0007626(locomotory behavior)//GO:0033235(positive regulation of protein sumoylation)//GO:0031397(negative regulation of protein ubiquitination)	GO:0016020(membrane)//GO:0005886(plasma membrane)//GO:0045202(synapse)	GO:0005525(GTP binding)//GO:0003924(GTPase activity)//GO:0000166(nucleotide binding)//GO:0031681(G-protein beta-subunit binding)//GO:0031624(ubiquitin conjugating enzyme binding)//GO:0043548(phosphatidylinositol 3-kinase binding)
ENSG00000100307	2.30672	1.20585	9.20041e-06	0.000111169	up	179	113	4.07785	2.88722	chr22	39120167	39152680	-	chr22:39120167-39152680	CBX7	protein_coding	23492	-	MIM:608457|HGNC:HGNC:1557|Ensembl:ENSG00000100307	22q13.1	chromobox 7		GO:0006325(chromatin organization)//GO:0000122(negative regulation of transcription by RNA polymerase II)	GO:0035102(PRC1 complex)//GO:0005634(nucleus)//GO:0005654(nucleoplasm)//GO:0005829(cytosol)//GO:0000785(chromatin)//GO:0031519(PcG protein complex)	GO:0005515(protein binding)
ENSG00000100321	2.37015	1.24498	2.27654e-05	0.000242454	up	127	78	3.58784	2.36521	chr22	39349925	39385575	+	chr22:39349925-39385575	SYNGR1	protein_coding	9145	-	MIM:603925|HGNC:HGNC:11498|Ensembl:ENSG00000100321	22q13.1	synaptogyrin 1		GO:0048172(regulation of short-term neuronal synaptic plasticity)//GO:0043312(neutrophil degranulation)//GO:0045055(regulated exocytosis)//GO:0048169(regulation of long-term neuronal synaptic plasticity)//GO:0048499(synaptic vesicle membrane organization)//GO:0006605(protein targeting)//GO:1990830(cellular response to leukemia inhibitory factor)	GO:0016020(membrane)//GO:0016021(integral component of membrane)//GO:0031410(cytoplasmic vesicle)//GO:0030054(cell junction)//GO:0045202(synapse)//GO:0042470(melanosome)//GO:0030672(synaptic vesicle membrane)//GO:0005886(plasma membrane)//GO:0035577(azurophil granule membrane)//GO:0031594(neuromuscular junction)//GO:0008021(synaptic vesicle)//GO:0030285(integral component of synaptic vesicle memb…	GO:0005515(protein binding)
ENSG00000100439	7.12024	2.83193	6.95957e-15	8.1142e-13	up	113	23	3.42151	0.698305	chr14	22598237	22613215	+	chr14:22598237-22613215	ABHD4	protein_coding	63874	ABH4	HGNC:HGNC:20154|Ensembl:ENSG00000100439	14q11.2	abhydrolase domain containing 4, N-acyl phospholipase B		GO:0006629(lipid metabolic process)//GO:0016042(lipid catabolic process)//GO:0055088(lipid homeostasis)//GO:0006654(phosphatidic acid biosynthetic process)//GO:0036152(phosphatidylethanolamine acyl-chain remodeling)//GO:0070292(N-acylphosphatidylethanolamine metabolic process)	GO:0005739(mitochondrion)//GO:0005789(endoplasmic reticulum membrane)//GO:0005811(lipid droplet)	GO:0016787(hydrolase activity)//GO:0005515(protein binding)//GO:0052689(carboxylic ester hydrolase activity)//GO:0004622(lysophospholipase activity)//GO:0042171(lysophosphatidic acid acyltransferase activity)
ENSG00000100485	2.14484	1.10087	2.9699e-07	5.44877e-06	up	1494	1015	7.12794	6.02869	chr14	50117130	50231578	-	chr14:50117130-50231578	SOS2	protein_coding	6655	NS9|SOS-2	MIM:601247|HGNC:HGNC:11188|Ensembl:ENSG00000100485	14q21.3	SOS Ras/Rho guanine nucleotide exchange factor 2	hsa01521(EGFR tyrosine kinase inhibitor resistance)//hsa01522(Endocrine resistance)//hsa04010(MAPK signaling pathway)//hsa04012(ErbB signaling pathway)//hsa04014(Ras signaling pathway)//hsa04062(Chemokine signaling pathway)//hsa04068(FoxO signaling pathway)//hsa04072(Phospholipase D signaling pathway)//hsa04150(mTOR signaling pathway)//hsa04151(PI3K-Akt signaling pathway)//hsa04510(Focal adhesion…	GO:0007264(small GTPase mediated signal transduction)//GO:0050790(regulation of catalytic activity)//GO:0051056(regulation of small GTPase mediated signal transduction)//GO:0007186(G protein-coupled receptor signaling pathway)//GO:0043065(positive regulation of apoptotic process)//GO:0001782(B cell homeostasis)//GO:0002260(lymphocyte homeostasis)//GO:0033081(regulation of T cell differentiation i…	GO:0005829(cytosol)	GO:0003677(DNA binding)//GO:0005085(guanyl-nucleotide exchange factor activity)//GO:0046982(protein heterodimerization activity)//GO:0005515(protein binding)
ENSG00000100599	3.61421	1.85368	2.05812e-13	1.79182e-11	up	345	139	5.01845	3.18063	chr14	92513781	92688994	+	chr14:92513781-92688994	RIN3	protein_coding	79890	-	MIM:610223|HGNC:HGNC:18751|Ensembl:ENSG00000100599	14q32.12	Ras and Rab interactor 3		GO:0007165(signal transduction)//GO:0050790(regulation of catalytic activity)//GO:0043547(positive regulation of GTPase activity)//GO:0006897(endocytosis)//GO:0002091(negative regulation of receptor internalization)//GO:0097494(regulation of vesicle size)//GO:0060755(negative regulation of mast cell chemotaxis)	GO:0005737(cytoplasm)//GO:0043025(neuronal cell body)//GO:0005768(endosome)//GO:0031410(cytoplasmic vesicle)//GO:0005769(early endosome)//GO:0005829(cytosol)//GO:0030424(axon)//GO:0030425(dendrite)//GO:0031982(vesicle)//GO:0030139(endocytic vesicle)	GO:0005515(protein binding)//GO:0005085(guanyl-nucleotide exchange factor activity)//GO:0005096(GTPase activator activity)//GO:0031267(small GTPase binding)
ENSG00000100625	3.99284	1.99741	3.25942e-11	1.79511e-09	up	151	55	3.83476	1.87823	chr14	60709539	60724351	-	chr14:60709539-60724351	SIX4	protein_coding	51804	AREC3	MIM:606342|HGNC:HGNC:10890|Ensembl:ENSG00000100625	14q23.1	SIX homeobox 4	hsa05202(Transcriptional misregulation in cancer)	GO:0006355(regulation of transcription, DNA-templated)//GO:0043066(negative regulation of apoptotic process)//GO:0007275(multicellular organism development)//GO:0045893(positive regulation of transcription, DNA-templated)//GO:0006357(regulation of transcription by RNA polymerase II)//GO:0008584(male gonad development)//GO:0043524(negative regulation of neuron apoptotic process)//GO:0045892(negati…	GO:0005634(nucleus)//GO:0005737(cytoplasm)//GO:0000785(chromatin)//GO:0005667(transcription regulator complex)	GO:0003677(DNA binding)//GO:0000981(DNA-binding transcription factor activity, RNA polymerase II-specific)//GO:0000978(RNA polymerase II cis-regulatory region sequence-specific DNA binding)//GO:1990837(sequence-specific double-stranded DNA binding)//GO:0001228(DNA-binding transcription activator activity, RNA polymerase II-specific)//GO:0003700(DNA-binding transcription factor activity)//GO:00435…
ENSG00000100852	13.9336	3.8005	9.70402e-08	2.06698e-06	up	30	3	1.5618	-1.56032	chr14	32076114	32159728	+	chr14:32076114-32159728	ARHGAP5	protein_coding	394	GFI2|RhoGAP5|p190-B|p190BRhoGAP	MIM:602680|HGNC:HGNC:675|Ensembl:ENSG00000100852	14q12	Rho GTPase activating protein 5	hsa04510(Focal adhesion)//hsa04670(Leukocyte transendothelial migration)	GO:0007165(signal transduction)//GO:0043547(positive regulation of GTPase activity)//GO:0051056(regulation of small GTPase mediated signal transduction)//GO:0007155(cell adhesion)//GO:0007266(Rho protein signal transduction)//GO:0030879(mammary gland development)	GO:0005737(cytoplasm)//GO:0016020(membrane)//GO:0005783(endoplasmic reticulum)//GO:0005829(cytosol)//GO:0005886(plasma membrane)	GO:0005525(GTP binding)//GO:0003924(GTPase activity)//GO:0005515(protein binding)//GO:0005096(GTPase activator activity)//GO:0042169(SH2 domain binding)
ENSG00000100985	2.83002	1.50081	1.17985e-11	7.10656e-10	up	1111	572	6.70114	5.2038	chr20	46008908	46016561	+	chr20:46008908-46016561	MMP9	protein_coding	4318	CLG4B|GELB|MANDP2|MMP-9	MIM:120361|HGNC:HGNC:7176|Ensembl:ENSG00000100985	20q13.12	matrix metallopeptidase 9	hsa01522(Endocrine resistance)//hsa04657(IL-17 signaling pathway)//hsa04668(TNF signaling pathway)//hsa04670(Leukocyte transendothelial migration)//hsa04915(Estrogen signaling pathway)//hsa04926(Relaxin signaling pathway)//hsa05161(Hepatitis B)//hsa05200(Pathways in cancer)//hsa05202(Transcriptional misregulation in cancer)//hsa05205(Proteoglycans in cancer)//hsa05206(MicroRNAs in cancer)//hsa052…	GO:0006508(proteolysis)//GO:1904707(positive regulation of vascular associated smooth muscle cell proliferation)//GO:1904645(response to amyloid-beta)//GO:0030335(positive regulation of cell migration)//GO:0030574(collagen catabolic process)//GO:0001503(ossification)//GO:0030198(extracellular matrix organization)//GO:0050900(leukocyte migration)//GO:0043312(neutrophil degranulation)//GO:0019221(c…	GO:0031012(extracellular matrix)//GO:0005576(extracellular region)//GO:0005615(extracellular space)//GO:0070062(extracellular exosome)//GO:0062023(collagen-containing extracellular matrix)//GO:1904813(ficolin-1-rich granule lumen)//GO:1904724(tertiary granule lumen)	GO:0008270(zinc ion binding)//GO:0008237(metallopeptidase activity)//GO:0004222(metalloendopeptidase activity)//GO:0046872(metal ion binding)//GO:0008233(peptidase activity)//GO:0016787(hydrolase activity)//GO:0005515(protein binding)//GO:0042802(identical protein binding)//GO:0005518(collagen binding)//GO:0004252(serine-type endopeptidase activity)//GO:0004175(endopeptidase activity)
ENSG00000101040	2.14959	1.10406	2.1027e-07	4.03868e-06	up	1900	1288	7.47443	6.37165	chr20	47209214	47356889	-	chr20:47209214-47356889	ZMYND8	protein_coding	23613	PRKCBP1|PRO2893|RACK7	MIM:615713|HGNC:HGNC:9397|Ensembl:ENSG00000101040	20q13.12	zinc finger MYND-type containing 8		GO:0006355(regulation of transcription, DNA-templated)//GO:0045892(negative regulation of transcription, DNA-templated)//GO:0030336(negative regulation of cell migration)//GO:0051491(positive regulation of filopodium assembly)//GO:0060999(positive regulation of dendritic spine development)//GO:0098815(modulation of excitatory postsynaptic potential)//GO:1902897(regulation of postsynaptic density …	GO:0005634(nucleus)//GO:0005737(cytoplasm)//GO:0005794(Golgi apparatus)//GO:0005654(nucleoplasm)//GO:0043197(dendritic spine)//GO:0043198(dendritic shaft)	GO:0005515(protein binding)//GO:0046872(metal ion binding)//GO:0008270(zinc ion binding)//GO:0019904(protein domain specific binding)//GO:0035064(methylated histone binding)//GO:0003714(transcription corepressor activity)//GO:0070577(lysine-acetylated histone binding)//GO:0070491(repressing transcription factor binding)//GO:0047485(protein N-terminus binding)
ENSG00000101049	7.16163	2.84029	2.03527e-13	1.78754e-11	up	94	19	3.1599	0.449844	chr20	43558968	43588237	+	chr20:43558968-43588237	SGK2	protein_coding	10110	H-SGK2|dJ138B7.2	MIM:607589|HGNC:HGNC:13900|Ensembl:ENSG00000101049	20q13.12	serum/glucocorticoid regulated kinase 2	hsa04068(FoxO signaling pathway)//hsa04151(PI3K-Akt signaling pathway)	GO:0006468(protein phosphorylation)//GO:0016310(phosphorylation)//GO:0035556(intracellular signal transduction)//GO:0034220(ion transmembrane transport)//GO:0018105(peptidyl-serine phosphorylation)//GO:0042127(regulation of cell population proliferation)//GO:0001558(regulation of cell growth)//GO:0032411(positive regulation of transporter activity)//GO:0006979(response to oxidative stress)	GO:0005634(nucleus)//GO:0005737(cytoplasm)//GO:0005654(nucleoplasm)//GO:0005829(cytosol)	GO:0000166(nucleotide binding)//GO:0004672(protein kinase activity)//GO:0004674(protein serine/threonine kinase activity)//GO:0005524(ATP binding)//GO:0016301(kinase activity)//GO:0016740(transferase activity)//GO:0005515(protein binding)//GO:0015459(potassium channel regulator activity)//GO:0017080(sodium channel regulator activity)
ENSG00000101115	2.73385	1.45094	6.18032e-07	1.05044e-05	up	139	74	3.71657	2.29148	chr20	51782331	51802521	-	chr20:51782331-51802521	SALL4	protein_coding	57167	DRRS|HSAL4|ZNF797	MIM:607343|HGNC:HGNC:15924|Ensembl:ENSG00000101115	20q13.2	spalt like transcription factor 4		GO:0006357(regulation of transcription by RNA polymerase II)//GO:0035019(somatic stem cell population maintenance)//GO:0000122(negative regulation of transcription by RNA polymerase II)//GO:0001701(in utero embryonic development)//GO:0001833(inner cell mass cell proliferation)//GO:0001843(neural tube closure)//GO:0003281(ventricular septum development)//GO:0007507(heart development)//GO:0009888(t…	GO:0005634(nucleus)//GO:0005737(cytoplasm)//GO:0043231(intracellular membrane-bounded organelle)//GO:0005654(nucleoplasm)//GO:0000792(heterochromatin)//GO:0032991(protein-containing complex)	GO:0046872(metal ion binding)//GO:0003677(DNA binding)//GO:0005515(protein binding)//GO:0000981(DNA-binding transcription factor activity, RNA polymerase II-specific)//GO:0000978(RNA polymerase II cis-regulatory region sequence-specific DNA binding)//GO:0008134(transcription factor binding)
ENSG00000101134	109.12	6.76978	0.000352487	0.00248323	up	11	0	0.233025	-2.77056	chr20	54475593	54651169	+	chr20:54475593-54651169	DOK5	protein_coding	55816	C20orf180|IRS-6|IRS6	MIM:608334|HGNC:HGNC:16173|Ensembl:ENSG00000101134	20q13.2	docking protein 5		GO:0007411(axon guidance)//GO:0007169(transmembrane receptor protein tyrosine kinase signaling pathway)//GO:0030182(neuron differentiation)//GO:0043410(positive regulation of MAPK cascade)//GO:0051386(regulation of neurotrophin TRK receptor signaling pathway)	GO:0005829(cytosol)	GO:0005515(protein binding)
ENSG00000101213	2.30806	1.20668	5.90773e-05	0.000548336	up	111	70	3.3961	2.21377	chr20	63528001	63537376	-	chr20:63528001-63537376	PTK6	protein_coding	5753	BRK	MIM:602004|HGNC:HGNC:9617|Ensembl:ENSG00000101213	20q13.33	protein tyrosine kinase 6		GO:0006468(protein phosphorylation)//GO:0016310(phosphorylation)//GO:0045087(innate immune response)//GO:0030154(cell differentiation)//GO:0016477(cell migration)//GO:0042127(regulation of cell population proliferation)//GO:0046777(protein autophosphorylation)//GO:0038128(ERBB2 signaling pathway)//GO:0042531(positive regulation of tyrosine phosphorylation of STAT protein)//GO:0007169(transmembran…	GO:0005634(nucleus)//GO:0005737(cytoplasm)//GO:0016020(membrane)//GO:0005654(nucleoplasm)//GO:0005829(cytosol)//GO:0005886(plasma membrane)//GO:0016604(nuclear body)//GO:0042995(cell projection)//GO:0001726(ruffle)//GO:0031234(extrinsic component of cytoplasmic side of plasma membrane)	GO:0005524(ATP binding)//GO:0005515(protein binding)//GO:0004672(protein kinase activity)//GO:0004713(protein tyrosine kinase activity)//GO:0000166(nucleotide binding)//GO:0016301(kinase activity)//GO:0016740(transferase activity)//GO:0004715(non-membrane spanning protein tyrosine kinase activity)//GO:0042802(identical protein binding)//GO:0005102(signaling receptor binding)
ENSG00000101255	2.12736	1.08907	9.52339e-07	1.53739e-05	up	749	513	6.1333	5.0474	chr20	362835	397559	+	chr20:362835-397559	TRIB3	protein_coding	57761	C20orf97|NIPK|SINK|SKIP3|TRB3	MIM:607898|HGNC:HGNC:16228|Ensembl:ENSG00000101255	20p13	tribbles pseudokinase 3	hsa04931(Insulin resistance)	GO:0045892(negative regulation of transcription, DNA-templated)//GO:0006468(protein phosphorylation)//GO:0045599(negative regulation of fat cell differentiation)//GO:0045717(negative regulation of fatty acid biosynthetic process)//GO:0032869(cellular response to insulin stimulus)//GO:0006469(negative regulation of protein kinase activity)//GO:0006915(apoptotic process)//GO:0043405(regulation of M…	GO:0005634(nucleus)//GO:0005654(nucleoplasm)//GO:0005886(plasma membrane)//GO:0005829(cytosol)	GO:0003714(transcription corepressor activity)//GO:0005524(ATP binding)//GO:0004672(protein kinase activity)//GO:0005515(protein binding)//GO:0004860(protein kinase inhibitor activity)//GO:0019901(protein kinase binding)//GO:0031625(ubiquitin protein ligase binding)//GO:0031434(mitogen-activated protein kinase kinase binding)//GO:0055106(ubiquitin-protein transferase regulator activity)//GO:00198…
ENSG00000101333	2.367	1.24306	0.0112329	0.0442777	up	31	19	1.6068	0.449844	chr20	9068763	9481242	+	chr20:9068763-9481242	PLCB4	protein_coding	5332	ARCND2|PI-PLC	MIM:600810|HGNC:HGNC:9059|Ensembl:ENSG00000101333	20p12.3-p12.2	phospholipase C beta 4	hsa00562(Inositol phosphate metabolism)//hsa01100(Metabolic pathways)//hsa04015(Rap1 signaling pathway)//hsa04020(Calcium signaling pathway)//hsa04022(cGMP-PKG signaling pathway)//hsa04062(Chemokine signaling pathway)//hsa04070(Phosphatidylinositol signaling system)//hsa04071(Sphingolipid signaling pathway)//hsa04072(Phospholipase D signaling pathway)//hsa04261(Adrenergic signaling in cardiomyocy…	GO:0035556(intracellular signal transduction)//GO:0007165(signal transduction)//GO:0006629(lipid metabolic process)//GO:0016042(lipid catabolic process)//GO:0007186(G protein-coupled receptor signaling pathway)//GO:0048015(phosphatidylinositol-mediated signaling)//GO:0043647(inositol phosphate metabolic process)//GO:0050804(modulation of chemical synaptic transmission)	GO:0005829(cytosol)//GO:0005634(nucleus)//GO:0005790(smooth endoplasmic reticulum)//GO:0014069(postsynaptic density)//GO:0030425(dendrite)//GO:0098688(parallel fiber to Purkinje cell synapse)//GO:0098794(postsynapse)//GO:0098978(glutamatergic synapse)	GO:0005509(calcium ion binding)//GO:0004435(phosphatidylinositol phospholipase C activity)//GO:0008081(phosphoric diester hydrolase activity)//GO:0016787(hydrolase activity)//GO:0005515(protein binding)//GO:0004629(phospholipase C activity)
ENSG00000101335	2.98032	1.57547	9.47003e-11	4.61623e-09	up	399	195	5.22736	3.66231	chr20	36541497	36551447	+	chr20:36541497-36551447	MYL9	protein_coding	10398	LC20|MLC-2C|MLC2|MRLC1|MYRL2	MIM:609905|HGNC:HGNC:15754|Ensembl:ENSG00000101335	20q11.23	myosin light chain 9	hsa04022(cGMP-PKG signaling pathway)//hsa04024(cAMP signaling pathway)//hsa04270(Vascular smooth muscle contraction)//hsa04360(Axon guidance)//hsa04510(Focal adhesion)//hsa04530(Tight junction)//hsa04670(Leukocyte transendothelial migration)//hsa04810(Regulation of actin cytoskeleton)//hsa04921(Oxytocin signaling pathway)//hsa05131(Shigellosis)//hsa05132(Salmonella infection)	GO:0070527(platelet aggregation)//GO:0045652(regulation of megakaryocyte differentiation)//GO:0006936(muscle contraction)//GO:0006937(regulation of muscle contraction)	GO:0016459(myosin complex)//GO:0005829(cytosol)//GO:0005859(muscle myosin complex)//GO:0001725(stress fiber)//GO:0016460(myosin II complex)//GO:0030018(Z disc)	GO:0005509(calcium ion binding)//GO:0046872(metal ion binding)//GO:0005515(protein binding)//GO:0008307(structural constituent of muscle)//GO:0032036(myosin heavy chain binding)
ENSG00000101417	2.00853	1.00614	4.55242e-05	0.000442524	up	273	198	4.68247	3.68408	chr20	33702758	33720319	-	chr20:33702758-33720319	PXMP4	protein_coding	11264	PMP24	MIM:616397|HGNC:HGNC:15920|Ensembl:ENSG00000101417	20q11.22	peroxisomal membrane protein 4	hsa04146(Peroxisome)	GO:0008150(biological_process)	GO:0016020(membrane)//GO:0016021(integral component of membrane)//GO:0005777(peroxisome)//GO:0005778(peroxisomal membrane)	GO:0005515(protein binding)
ENSG00000101425	12.3312	3.62424	7.71158e-09	2.31166e-07	up	35	4	1.77393	-1.31025	chr20	38304150	38337505	+	chr20:38304150-38337505	BPI	protein_coding	671	BPIFD1|rBPI	MIM:109195|HGNC:HGNC:1095|Ensembl:ENSG00000101425	20q11.23	bactericidal permeability increasing protein		GO:0006955(immune response)//GO:0050829(defense response to Gram-negative bacterium)//GO:0042742(defense response to bacterium)//GO:0032715(negative regulation of interleukin-6 production)//GO:0032717(negative regulation of interleukin-8 production)//GO:0045087(innate immune response)//GO:0043312(neutrophil degranulation)//GO:0032720(negative regulation of tumor necrosis factor production)//GO:00…	GO:0005615(extracellular space)//GO:0016020(membrane)//GO:0005576(extracellular region)//GO:0070062(extracellular exosome)//GO:0035580(specific granule lumen)//GO:0035578(azurophil granule lumen)//GO:0005737(cytoplasm)	GO:0008289(lipid binding)//GO:0001530(lipopolysaccharide binding)
ENSG00000101445	2.529	1.33856	3.2658e-09	1.06738e-07	up	703	405	6.04205	4.70807	chr20	38805697	38923024	+	chr20:38805697-38923024	PPP1R16B	protein_coding	26051	ANKRD4|TIMAP	MIM:613275|HGNC:HGNC:15850|Ensembl:ENSG00000101445	20q11.23	protein phosphatase 1 regulatory subunit 16B		GO:0043666(regulation of phosphoprotein phosphatase activity)//GO:0014066(regulation of phosphatidylinositol 3-kinase signaling)//GO:0035308(negative regulation of protein dephosphorylation)//GO:0001938(positive regulation of endothelial cell proliferation)//GO:0051489(regulation of filopodium assembly)//GO:0035307(positive regulation of protein dephosphorylation)//GO:0035304(regulation of protei…	GO:0005634(nucleus)//GO:0016607(nuclear speck)//GO:0016020(membrane)//GO:0005886(plasma membrane)//GO:0042995(cell projection)//GO:0048471(perinuclear region of cytoplasm)	GO:0019888(protein phosphatase regulator activity)//GO:0005515(protein binding)//GO:0008157(protein phosphatase 1 binding)//GO:0017020(myosin phosphatase regulator activity)
ENSG00000101605	8.55696	3.0971	9.19797e-08	1.98248e-06	up	36	6	1.81285	-0.911577	chr18	3066807	3219968	-	chr18:3066807-3219968	MYOM1	protein_coding	8736	SKELEMIN	MIM:603508|HGNC:HGNC:7613|Ensembl:ENSG00000101605	18p11.31	myomesin 1		GO:0010628(positive regulation of gene expression)//GO:0006936(muscle contraction)//GO:0002074(extraocular skeletal muscle development)//GO:0010737(protein kinase A signaling)//GO:0050714(positive regulation of protein secretion)	GO:0005737(cytoplasm)//GO:0032982(myosin filament)//GO:0031430(M band)//GO:0005863(striated muscle myosin thick filament)//GO:0030017(sarcomere)	GO:0005515(protein binding)//GO:0042803(protein homodimerization activity)//GO:0042802(identical protein binding)//GO:0051015(actin filament binding)//GO:0008307(structural constituent of muscle)//GO:0019900(kinase binding)
ENSG00000101670	2.743	1.45575	0.0246357	0.0836675	up	19	10	0.943718	-0.343168	chr18	49560699	49599185	+	chr18:49560699-49599185	LIPG	protein_coding	9388	EDL|EL|PRO719	MIM:603684|HGNC:HGNC:6623|Ensembl:ENSG00000101670	18q21.1	lipase G, endothelial type	hsa00561(Glycerolipid metabolism)//hsa01100(Metabolic pathways)//hsa04979(Cholesterol metabolism)	GO:0006629(lipid metabolic process)//GO:0042632(cholesterol homeostasis)//GO:0010983(positive regulation of high-density lipoprotein particle clearance)//GO:0016042(lipid catabolic process)//GO:0007584(response to nutrient)//GO:0008283(cell population proliferation)//GO:0050746(regulation of lipoprotein metabolic process)//GO:0034375(high-density lipoprotein particle remodeling)//GO:0043691(rever…	GO:0005576(extracellular region)//GO:0005615(extracellular space)//GO:0005794(Golgi apparatus)//GO:0009986(cell surface)//GO:0005769(early endosome)	GO:0004806(triglyceride lipase activity)//GO:0004465(lipoprotein lipase activity)//GO:0005515(protein binding)//GO:0052689(carboxylic ester hydrolase activity)//GO:0046872(metal ion binding)//GO:0016787(hydrolase activity)//GO:0004620(phospholipase activity)//GO:0008201(heparin binding)//GO:0008970(phospholipase A1 activity)//GO:0052739(phosphatidylserine 1-acylhydrolase activity)//GO:0052740(1-a…
ENSG00000101746	138.608	7.11486	5.32834e-05	0.000501243	up	14	0	0.541877	-2.77056	chr18	33851100	34224952	-	chr18:33851100-34224952	NOL4	protein_coding	8715	CT125|HRIHFB2255|NOLP	MIM:603577|HGNC:HGNC:7870|Ensembl:ENSG00000101746	18q12.1	nucleolar protein 4			GO:0005730(nucleolus)//GO:0005634(nucleus)	GO:0003723(RNA binding)//GO:0005515(protein binding)
ENSG00000101890	6.73386	2.75143	8.30547e-13	6.54491e-11	up	93	20	3.14472	0.516085	chrX	109372906	109482086	-	chrX:109372906-109482086	GUCY2F	protein_coding	2986	CYGF|GC-F|GUC2DL|GUC2F|RETGC-2|ROS-GC2	MIM:300041|HGNC:HGNC:4691|Ensembl:ENSG00000101890	Xq22.3-q23	guanylate cyclase 2F, retinal	hsa00230(Purine metabolism)//hsa01100(Metabolic pathways)//hsa04744(Phototransduction)	GO:0006468(protein phosphorylation)//GO:0035556(intracellular signal transduction)//GO:0009190(cyclic nucleotide biosynthetic process)//GO:0006182(cGMP biosynthetic process)//GO:0007601(visual perception)//GO:0050896(response to stimulus)//GO:0007165(signal transduction)//GO:0022400(regulation of rhodopsin mediated signaling pathway)//GO:0007168(receptor guanylyl cyclase signaling pathway)//GO:00…	GO:0016020(membrane)//GO:0016021(integral component of membrane)//GO:0042995(cell projection)//GO:0005886(plasma membrane)//GO:0005887(integral component of plasma membrane)//GO:0097381(photoreceptor disc membrane)//GO:0005640(nuclear outer membrane)//GO:0120200(rod photoreceptor outer segment)	GO:0005524(ATP binding)//GO:0004672(protein kinase activity)//GO:0004383(guanylate cyclase activity)//GO:0016849(phosphorus-oxygen lyase activity)//GO:0000166(nucleotide binding)//GO:0016829(lyase activity)//GO:0005525(GTP binding)//GO:0038023(signaling receptor activity)//GO:0001653(peptide receptor activity)//GO:0042802(identical protein binding)//GO:0044877(protein-containing complex binding)
ENSG00000101938	5.49585	2.45834	0.0246349	0.0836675	up	8	2	-0.160477	-1.86302	chrX	110673856	110795819	-	chrX:110673856-110795819	CHRDL1	protein_coding	91851	CHL|MGC1|MGCN|NRLN1|VOPT|dA141H5.1	MIM:300350|HGNC:HGNC:29861|Ensembl:ENSG00000101938	Xq23	chordin like 1		GO:0007275(multicellular organism development)//GO:0030154(cell differentiation)//GO:0007399(nervous system development)//GO:0001503(ossification)//GO:0044267(cellular protein metabolic process)//GO:0001654(eye development)//GO:0043687(post-translational protein modification)//GO:0030509(BMP signaling pathway)//GO:0030514(negative regulation of BMP signaling pathway)	GO:0005576(extracellular region)//GO:0005788(endoplasmic reticulum lumen)	GO:0005515(protein binding)
ENSG00000101958	2.65803	1.41036	0.00277966	0.0140441	up	33	18	1.69278	0.380416	chrX	14529298	14731812	+	chrX:14529298-14731812	GLRA2	protein_coding	2742	GLR	MIM:305990|HGNC:HGNC:4327|Ensembl:ENSG00000101958	Xp22.2	glycine receptor alpha 2	hsa04080(Neuroactive ligand-receptor interaction)	GO:0006811(ion transport)//GO:0006821(chloride transport)//GO:0034220(ion transmembrane transport)//GO:0007218(neuropeptide signaling pathway)//GO:0060079(excitatory postsynaptic potential)//GO:0060078(regulation of postsynaptic membrane potential)//GO:0071230(cellular response to amino acid stimulus)//GO:0007165(signal transduction)//GO:0007268(chemical synaptic transmission)//GO:0042391(regulat…	GO:0016021(integral component of membrane)//GO:0005887(integral component of plasma membrane)//GO:0045211(postsynaptic membrane)//GO:0016020(membrane)//GO:0005886(plasma membrane)//GO:0030054(cell junction)//GO:0042995(cell projection)//GO:0045202(synapse)//GO:0034707(chloride channel complex)//GO:0043005(neuron projection)//GO:0098690(glycinergic synapse)	GO:0005216(ion channel activity)//GO:0004888(transmembrane signaling receptor activity)//GO:0005230(extracellular ligand-gated ion channel activity)//GO:0016934(extracellularly glycine-gated chloride channel activity)//GO:0016594(glycine binding)//GO:0022824(transmitter-gated ion channel activity)//GO:0046872(metal ion binding)//GO:0005254(chloride channel activity)//GO:0030594(neurotransmitter r…
ENSG00000102007	2.06889	1.04886	3.93994e-05	0.000389057	up	223	157	4.39246	3.35363	chrX	49171898	49175235	+	chrX:49171898-49175235	PLP2	protein_coding	5355	A4|A4LSB	MIM:300112|HGNC:HGNC:9087|Ensembl:ENSG00000102007	Xp11.23	proteolipid protein 2		GO:0034220(ion transmembrane transport)//GO:0006935(chemotaxis)//GO:0019221(cytokine-mediated signaling pathway)//GO:0006811(ion transport)	GO:0016020(membrane)//GO:0016021(integral component of membrane)//GO:0005886(plasma membrane)//GO:0005783(endoplasmic reticulum)//GO:0005789(endoplasmic reticulum membrane)	GO:0005515(protein binding)//GO:0015075(ion transmembrane transporter activity)//GO:0019956(chemokine binding)
ENSG00000102038	69.8039	6.12524	0.00894141	0.0368468	up	7	0	-0.319755	-2.77056	chrX	129446501	129523500	-	chrX:129446501-129523500	SMARCA1	protein_coding	6594	ISWI|NURF140|SNF2L|SNF2L1|SNF2LB|SNF2LT|SWI|SWI2|hSNF2L	MIM:300012|HGNC:HGNC:11097|Ensembl:ENSG00000102038	Xq25-q26.1	SWI/SNF related, matrix associated, actin dependent regulator of chromatin, subfamily a, member 1		GO:0006338(chromatin remodeling)//GO:0043044(ATP-dependent chromatin remodeling)//GO:0006325(chromatin organization)//GO:0045944(positive regulation of transcription by RNA polymerase II)//GO:0000733(DNA strand renaturation)//GO:0045893(positive regulation of transcription, DNA-templated)//GO:0007420(brain development)//GO:0030182(neuron differentiation)//GO:2000177(regulation of neural precursor…	GO:0005634(nucleus)//GO:0016589(NURF complex)//GO:0043231(intracellular membrane-bounded organelle)//GO:0005654(nucleoplasm)//GO:0090537(CERF complex)//GO:0000785(chromatin)	GO:0003677(DNA binding)//GO:0005524(ATP binding)//GO:0016818(hydrolase activity, acting on acid anhydrides, in phosphorus-containing anhydrides)//GO:0003676(nucleic acid binding)//GO:0016887(ATPase activity)//GO:0031491(nucleosome binding)//GO:0000166(nucleotide binding)//GO:0016787(hydrolase activity)//GO:0005515(protein binding)//GO:0004386(helicase activity)//GO:0008134(transcription factor bi…
ENSG00000102119	168.095	7.39313	8.35118e-06	0.000102523	up	17	0	0.796127	-2.77056	chrX	154379273	154381574	+	chrX:154379273-154381574	EMD	protein_coding	2010	EDMD|LEMD5|STA	MIM:300384|HGNC:HGNC:3331|Ensembl:ENSG00000102119	Xq28	emerin	hsa05410(Hypertrophic cardiomyopathy)//hsa05412(Arrhythmogenic right ventricular cardiomyopathy)//hsa05414(Dilated cardiomyopathy)	GO:0090090(negative regulation of canonical Wnt signaling pathway)//GO:0048147(negative regulation of fibroblast proliferation)//GO:0006936(muscle contraction)//GO:0071763(nuclear membrane organization)//GO:0007517(muscle organ development)//GO:0071363(cellular response to growth factor stimulus)//GO:0060828(regulation of canonical Wnt signaling pathway)//GO:0007084(mitotic nuclear envelope reass…	GO:0005635(nuclear envelope)//GO:0016020(membrane)//GO:0016021(integral component of membrane)//GO:0005783(endoplasmic reticulum)//GO:0031965(nuclear membrane)//GO:0005634(nucleus)//GO:0005874(microtubule)//GO:0005637(nuclear inner membrane)//GO:0005640(nuclear outer membrane)//GO:0005819(spindle)//GO:0032541(cortical endoplasmic reticulum)//GO:0005737(cytoplasm)//GO:0005654(nucleoplasm)//GO:0031…	GO:0003779(actin binding)//GO:0005515(protein binding)//GO:0045296(cadherin binding)//GO:0048487(beta-tubulin binding)
ENSG00000102349	3.10307	1.6337	3.2228e-06	4.47132e-05	up	79	37	2.91358	1.33403	chrX	56232356	56291531	+	chrX:56232356-56291531	KLF8	protein_coding	11279	BKLF3|ZNF741	MIM:300286|HGNC:HGNC:6351|Ensembl:ENSG00000102349	Xp11.21	Kruppel like factor 8		GO:0006357(regulation of transcription by RNA polymerase II)//GO:0000122(negative regulation of transcription by RNA polymerase II)	GO:0005634(nucleus)//GO:0005654(nucleoplasm)//GO:0005829(cytosol)//GO:0016235(aggresome)//GO:0000785(chromatin)	GO:0046872(metal ion binding)//GO:0003677(DNA binding)//GO:0000981(DNA-binding transcription factor activity, RNA polymerase II-specific)//GO:0000978(RNA polymerase II cis-regulatory region sequence-specific DNA binding)//GO:0001227(DNA-binding transcription repressor activity, RNA polymerase II-specific)
ENSG00000102383	2.20005	1.13753	0.00173673	0.00957048	up	59	39	2.50192	1.40567	chrX	75368427	75523502	-	chrX:75368427-75523502	ZDHHC15	protein_coding	158866	DHHC15|MRX91	MIM:300576|HGNC:HGNC:20342|Ensembl:ENSG00000102383	Xq13.3	zinc finger DHHC-type palmitoyltransferase 15		GO:0018215(protein phosphopantetheinylation)//GO:0072657(protein localization to membrane)//GO:0006612(protein targeting to membrane)//GO:0016188(synaptic vesicle maturation)//GO:0061001(regulation of dendritic spine morphogenesis)//GO:0018230(peptidyl-L-cysteine S-palmitoylation)//GO:0018345(protein palmitoylation)//GO:1900006(positive regulation of dendrite development)//GO:0045184(establishmen…	GO:0016020(membrane)//GO:0016021(integral component of membrane)//GO:0005794(Golgi apparatus)//GO:0030054(cell junction)//GO:0000139(Golgi membrane)//GO:0045202(synapse)//GO:0014069(postsynaptic density)//GO:0005783(endoplasmic reticulum)//GO:0030173(integral component of Golgi membrane)//GO:0098794(postsynapse)	GO:0016409(palmitoyltransferase activity)//GO:0046872(metal ion binding)//GO:0016740(transferase activity)//GO:0008270(zinc ion binding)//GO:0016746(transferase activity, transferring acyl groups)//GO:0019706(protein-cysteine S-palmitoyltransferase activity)//GO:0005515(protein binding)
ENSG00000102385	2.13512	1.09432	0.00629561	0.0275314	up	47	32	2.18336	1.13762	chrX	101219769	101264502	+	chrX:101219769-101264502	DRP2	protein_coding	1821	DRP-2	MIM:300052|HGNC:HGNC:3032|Ensembl:ENSG00000102385	Xq22.1	dystrophin related protein 2		GO:0007417(central nervous system development)//GO:0099536(synaptic signaling)//GO:0050808(synapse organization)	GO:0016020(membrane)//GO:0005886(plasma membrane)//GO:0030054(cell junction)//GO:0042995(cell projection)//GO:0030425(dendrite)//GO:0045202(synapse)//GO:0043204(perikaryon)//GO:0014069(postsynaptic density)//GO:0098978(glutamatergic synapse)	GO:0008270(zinc ion binding)//GO:0005515(protein binding)//GO:0046872(metal ion binding)
ENSG00000102468	6.00783	2.58684	0.000910749	0.00557666	up	17	4	0.796127	-1.31025	chr13	46831546	46897076	-	chr13:46831546-46897076	HTR2A	protein_coding	3356	5-HT2A|HTR2	MIM:182135|HGNC:HGNC:5293|Ensembl:ENSG00000102468	13q14.2	5-hydroxytryptamine receptor 2A	hsa04020(Calcium signaling pathway)//hsa04080(Neuroactive ligand-receptor interaction)//hsa04540(Gap junction)//hsa04726(Serotonergic synapse)//hsa04750(Inflammatory mediator regulation of TRP channels)	GO:0007186(G protein-coupled receptor signaling pathway)//GO:0007165(signal transduction)//GO:0016032(viral process)//GO:0046718(viral entry into host cell)//GO:0007268(chemical synaptic transmission)//GO:0070374(positive regulation of ERK1 and ERK2 cascade)//GO:0014065(phosphatidylinositol 3-kinase signaling)//GO:0007200(phospholipase C-activating G protein-coupled receptor signaling pathway)//G…	GO:0016021(integral component of membrane)//GO:0005887(integral component of plasma membrane)//GO:0016020(membrane)//GO:0005886(plasma membrane)//GO:0005901(caveola)//GO:0031410(cytoplasmic vesicle)//GO:0030054(cell junction)//GO:0042995(cell projection)//GO:0030425(dendrite)//GO:0045202(synapse)//GO:0030424(axon)//GO:0098793(presynapse)//GO:0005737(cytoplasm)//GO:0005829(cytosol)//GO:0043025(neu…	GO:0004930(G protein-coupled receptor activity)//GO:0004993(G protein-coupled serotonin receptor activity)//GO:0005515(protein binding)//GO:0042802(identical protein binding)//GO:0030594(neurotransmitter receptor activity)//GO:0001618(virus receptor activity)//GO:0001587(Gq/11-coupled serotonin receptor activity)//GO:0001965(G-protein alpha-subunit binding)//GO:0044877(protein-containing complex …
ENSG00000102575	128.779	7.00875	9.96168e-05	0.000850197	up	13	0	0.446089	-2.77056	chr19	11574660	11579008	-	chr19:11574660-11579008	ACP5	protein_coding	54	HPAP|TRACP5a|TRACP5b|TRAP|TrATPase	MIM:171640|HGNC:HGNC:124|Ensembl:ENSG00000102575	19p13.2	acid phosphatase 5, tartrate resistant	hsa00740(Riboflavin metabolism)//hsa01100(Metabolic pathways)//hsa04142(Lysosome)//hsa04380(Osteoclast differentiation)//hsa05323(Rheumatoid arthritis)	GO:0001503(ossification)//GO:0045453(bone resorption)//GO:0006771(riboflavin metabolic process)	GO:0005764(lysosome)//GO:0005829(cytosol)//GO:0016021(integral component of membrane)	GO:0016787(hydrolase activity)//GO:0003993(acid phosphatase activity)//GO:0046872(metal ion binding)//GO:0008198(ferrous iron binding)//GO:0008199(ferric iron binding)
ENSG00000102755	6.59699	2.72181	8.51151e-11	4.21077e-09	up	73	16	2.80193	0.230651	chr13	28300346	28495145	-	chr13:28300346-28495145	FLT1	protein_coding	2321	FLT|FLT-1|VEGFR-1|VEGFR1	MIM:165070|HGNC:HGNC:3763|Ensembl:ENSG00000102755	13q12.3	fms related receptor tyrosine kinase 1	hsa04010(MAPK signaling pathway)//hsa04014(Ras signaling pathway)//hsa04015(Rap1 signaling pathway)//hsa04020(Calcium signaling pathway)//hsa04066(HIF-1 signaling pathway)//hsa04151(PI3K-Akt signaling pathway)//hsa04510(Focal adhesion)//hsa05202(Transcriptional misregulation in cancer)//hsa05323(Rheumatoid arthritis)	GO:0006468(protein phosphorylation)//GO:0007169(transmembrane receptor protein tyrosine kinase signaling pathway)//GO:0048010(vascular endothelial growth factor receptor signaling pathway)//GO:1905563(negative regulation of vascular endothelial cell proliferation)//GO:0045766(positive regulation of angiogenesis)//GO:0016310(phosphorylation)//GO:0018108(peptidyl-tyrosine phosphorylation)//GO:00072…	GO:0005887(integral component of plasma membrane)//GO:0005737(cytoplasm)//GO:0016020(membrane)//GO:0016021(integral component of membrane)//GO:0005886(plasma membrane)//GO:0005768(endosome)//GO:0005576(extracellular region)//GO:0005925(focal adhesion)//GO:0015629(actin cytoskeleton)//GO:0005615(extracellular space)//GO:0043235(receptor complex)	GO:0005524(ATP binding)//GO:0004672(protein kinase activity)//GO:0004714(transmembrane receptor protein tyrosine kinase activity)//GO:0004713(protein tyrosine kinase activity)//GO:0005021(vascular endothelial growth factor-activated receptor activity)//GO:0000166(nucleotide binding)//GO:0016301(kinase activity)//GO:0016740(transferase activity)//GO:0005515(protein binding)//GO:0019838(growth fact…
ENSG00000102760	3.10481	1.6345	2.19602e-05	0.000235008	up	62	29	2.57167	1.00551	chr13	41457550	41470871	+	chr13:41457550-41470871	RGCC	protein_coding	28984	C13orf15|RGC-32|RGC32|bA157L14.2	MIM:610077|HGNC:HGNC:20369|Ensembl:ENSG00000102760	13q14.11	regulator of cell cycle		GO:0051726(regulation of cell cycle)//GO:0010628(positive regulation of gene expression)//GO:0043537(negative regulation of blood vessel endothelial cell migration)//GO:2000353(positive regulation of endothelial cell apoptotic process)//GO:1900087(positive regulation of G1/S transition of mitotic cell cycle)//GO:0008285(negative regulation of cell population proliferation)//GO:0001937(negative re…	GO:0005737(cytoplasm)//GO:0005634(nucleus)//GO:0005654(nucleoplasm)//GO:0005730(nucleolus)//GO:0005856(cytoskeleton)//GO:0005815(microtubule organizing center)//GO:0005829(cytosol)//GO:0005813(centrosome)	GO:0019901(protein kinase binding)//GO:0005515(protein binding)//GO:0070412(R-SMAD binding)//GO:0030295(protein kinase activator activity)
ENSG00000103316	4.8175	2.26828	0.0433314	0.131053	up	7	2	-0.319755	-1.86302	chr16	21238874	21303083	-	chr16:21238874-21303083	CRYM	protein_coding	1428	DFNA40|THBP	MIM:123740|HGNC:HGNC:2418|Ensembl:ENSG00000103316	16p12.2	crystallin mu		GO:0055114(oxidation-reduction process)//GO:0007605(sensory perception of sound)//GO:0000122(negative regulation of transcription by RNA polymerase II)//GO:0006554(lysine catabolic process)//GO:0070327(thyroid hormone transport)//GO:0042403(thyroid hormone metabolic process)	GO:0005737(cytoplasm)//GO:0005829(cytosol)//GO:0070062(extracellular exosome)//GO:0005782(peroxisomal matrix)	GO:0047127(thiomorpholine-carboxylate dehydrogenase activity)//GO:0016491(oxidoreductase activity)//GO:0042803(protein homodimerization activity)//GO:0005515(protein binding)//GO:0003714(transcription corepressor activity)//GO:0042562(hormone binding)//GO:0050661(NADP binding)//GO:0070324(thyroid hormone binding)
ENSG00000103449	89.4622	6.48321	0.00242129	0.0125332	up	9	0	-0.0170497	-2.77056	chr16	51135975	51151367	-	chr16:51135975-51151367	SALL1	protein_coding	6299	HEL-S-89|HSAL1|Sal-1|TBS|ZNF794	MIM:602218|HGNC:HGNC:10524|Ensembl:ENSG00000103449	16q12.1	spalt like transcription factor 1		GO:0001822(kidney development)//GO:0030177(positive regulation of Wnt signaling pathway)//GO:0045893(positive regulation of transcription, DNA-templated)//GO:0006357(regulation of transcription by RNA polymerase II)//GO:0000122(negative regulation of transcription by RNA polymerase II)//GO:0045944(positive regulation of transcription by RNA polymerase II)//GO:0007507(heart development)//GO:004589…	GO:0005634(nucleus)//GO:0005737(cytoplasm)//GO:0005654(nucleoplasm)//GO:0000792(heterochromatin)//GO:0010369(chromocenter)	GO:0046872(metal ion binding)//GO:0003677(DNA binding)//GO:0005515(protein binding)//GO:0000981(DNA-binding transcription factor activity, RNA polymerase II-specific)//GO:0000978(RNA polymerase II cis-regulatory region sequence-specific DNA binding)//GO:0008013(beta-catenin binding)//GO:0001227(DNA-binding transcription repressor activity, RNA polymerase II-specific)
ENSG00000103522	2.10797	1.07585	2.12561e-05	0.000228331	up	233	161	4.45532	3.38941	chr16	27402174	27452042	+	chr16:27402174-27452042	IL21R	protein_coding	50615	CD360|IMD56|NILR	MIM:605383|HGNC:HGNC:6006|Ensembl:ENSG00000103522	16p12.1	interleukin 21 receptor	hsa04060(Cytokine-cytokine receptor interaction)//hsa04630(JAK-STAT signaling pathway)//hsa04659(Th17 cell differentiation)//hsa05321(Inflammatory bowel disease)	GO:0030101(natural killer cell activation)//GO:0038114(interleukin-21-mediated signaling pathway)	GO:0016020(membrane)//GO:0016021(integral component of membrane)//GO:0005886(plasma membrane)	GO:0005515(protein binding)//GO:0004896(cytokine receptor activity)//GO:0004888(transmembrane signaling receptor activity)//GO:0001532(interleukin-21 receptor activity)
ENSG00000103528	5.50347	2.46034	6.96931e-07	1.16959e-05	up	42	11	2.02662	-0.230255	chr16	19167971	19268332	+	chr16:19167971-19268332	SYT17	protein_coding	51760	Syt-17|sytXVII	HGNC:HGNC:24119|Ensembl:ENSG00000103528	16p12.3	synaptotagmin 17		GO:0006887(exocytosis)//GO:0030154(cell differentiation)//GO:0016192(vesicle-mediated transport)//GO:0014059(regulation of dopamine secretion)//GO:0017156(calcium-ion regulated exocytosis)//GO:0017158(regulation of calcium ion-dependent exocytosis)//GO:0071277(cellular response to calcium ion)//GO:1903861(positive regulation of dendrite extension)	GO:0016020(membrane)//GO:0005886(plasma membrane)//GO:0070382(exocytic vesicle)	GO:0005515(protein binding)//GO:0005509(calcium ion binding)//GO:0005544(calcium-dependent phospholipid binding)//GO:0019905(syntaxin binding)//GO:0000149(SNARE binding)//GO:0001786(phosphatidylserine binding)//GO:0030276(clathrin binding)
ENSG00000103569	2.17504	1.12104	0.0444493	0.133602	up	24	16	1.25767	0.230651	chr15	58138169	58185911	+	chr15:58138169-58185911	AQP9	protein_coding	366	AQP-9|HsT17287|SSC1|T17287	MIM:602914|HGNC:HGNC:643|Ensembl:ENSG00000103569	15q21.3	aquaporin 9	hsa04613(Neutrophil extracellular trap formation)//hsa04976(Bile secretion)	GO:0055085(transmembrane transport)//GO:0071320(cellular response to cAMP)//GO:0006833(water transport)//GO:0015793(glycerol transport)//GO:0006970(response to osmotic stress)//GO:0006863(purine nucleobase transport)//GO:0007588(excretion)//GO:0010033(response to organic substance)//GO:0015722(canalicular bile acid transport)//GO:0015791(polyol transport)//GO:0015837(amine transport)//GO:0015855(…	GO:0016020(membrane)//GO:0016021(integral component of membrane)//GO:0005886(plasma membrane)//GO:0043231(intracellular membrane-bounded organelle)//GO:0005887(integral component of plasma membrane)//GO:0016323(basolateral plasma membrane)	GO:0015267(channel activity)//GO:0005515(protein binding)//GO:0015204(urea transmembrane transporter activity)//GO:0015250(water channel activity)//GO:0015254(glycerol channel activity)//GO:0005275(amine transmembrane transporter activity)//GO:0005345(purine nucleobase transmembrane transporter activity)//GO:0005350(pyrimidine nucleobase transmembrane transporter activity)//GO:0005372(water trans…
ENSG00000103647	2.4376	1.28546	0.00130803	0.00754796	up	52	31	2.32473	1.09492	chr15	68578993	68727806	+	chr15:68578993-68727806	CORO2B	protein_coding	10391	CLIPINC	MIM:605002|HGNC:HGNC:2256|Ensembl:ENSG00000103647	15q23	coronin 2B		GO:0030036(actin cytoskeleton organization)//GO:0032956(regulation of actin cytoskeleton organization)//GO:0003093(regulation of glomerular filtration)//GO:0010812(negative regulation of cell-substrate adhesion)//GO:0048041(focal adhesion assembly)//GO:0051497(negative regulation of stress fiber assembly)//GO:0080135(regulation of cellular response to stress)//GO:1904950(negative regulation of es…	GO:0016020(membrane)//GO:0005737(cytoplasm)//GO:0005856(cytoskeleton)//GO:0015629(actin cytoskeleton)//GO:0005925(focal adhesion)	GO:0005515(protein binding)//GO:0051015(actin filament binding)//GO:0003779(actin binding)//GO:0017166(vinculin binding)//GO:1990147(talin binding)
ENSG00000103942	2.59662	1.37664	5.9756e-08	1.36155e-06	up	271	152	4.67193	3.30762	chr15	82836946	82986153	-	chr15:82836946-82986153	HOMER2	protein_coding	9455	ACPD|CPD|DFNA68|HOMER-2|VESL-2	MIM:604799|HGNC:HGNC:17513|Ensembl:ENSG00000103942	15q25.2	homer scaffold protein 2	hsa04068(FoxO signaling pathway)//hsa04724(Glutamatergic synapse)	GO:0007605(sensory perception of sound)//GO:0007216(G protein-coupled glutamate receptor signaling pathway)//GO:2001256(regulation of store-operated calcium entry)//GO:0032703(negative regulation of interleukin-2 production)//GO:0070885(negative regulation of calcineurin-NFAT signaling cascade)//GO:0008277(regulation of G protein-coupled receptor signaling pathway)//GO:0035584(calcium-mediated si…	GO:0005737(cytoplasm)//GO:0016020(membrane)//GO:0005829(cytosol)//GO:0005886(plasma membrane)//GO:0030054(cell junction)//GO:0042995(cell projection)//GO:0045202(synapse)//GO:0014069(postsynaptic density)//GO:0032420(stereocilium)//GO:0032426(stereocilium tip)//GO:0030425(dendrite)//GO:0043229(intracellular organelle)//GO:0043025(neuronal cell body)//GO:0045177(apical part of cell)//GO:0098978(gl…	GO:0005515(protein binding)//GO:0035256(G protein-coupled glutamate receptor binding)//GO:0003779(actin binding)//GO:0019904(protein domain specific binding)//GO:0030160(synaptic receptor adaptor activity)//GO:0035254(glutamate receptor binding)//GO:0042802(identical protein binding)//GO:0044877(protein-containing complex binding)
ENSG00000104047	2.06265	1.0445	1.85771e-06	2.75779e-05	up	964	681	6.49669	5.45452	chr15	49621037	49656232	+	chr15:49621037-49656232	DTWD1	protein_coding	56986	MDS009	HGNC:HGNC:30926|Ensembl:ENSG00000104047	15q21.2	DTW domain containing 1		GO:0008033(tRNA processing)//GO:0006400(tRNA modification)	GO:0005634(nucleus)	GO:0016740(transferase activity)//GO:0016432(tRNA-uridine aminocarboxypropyltransferase activity)
ENSG00000104055	2.24414	1.16616	1.23076e-05	0.000143077	up	188	122	4.14802	2.99567	chr15	43232590	43266928	-	chr15:43232590-43266928	TGM5	protein_coding	9333	PSS2|TGASE5|TGASEX|TGM6|TGMX|TGX	MIM:603805|HGNC:HGNC:11781|Ensembl:ENSG00000104055	15q15.2	transglutaminase 5		GO:0018149(peptide cross-linking)//GO:0018215(protein phosphopantetheinylation)//GO:0006464(cellular protein modification process)//GO:0008544(epidermis development)//GO:0070268(cornification)	GO:0005737(cytoplasm)//GO:0005886(plasma membrane)	GO:0003810(protein-glutamine gamma-glutamyltransferase activity)//GO:0046872(metal ion binding)//GO:0016740(transferase activity)//GO:0016746(transferase activity, transferring acyl groups)//GO:0005515(protein binding)
ENSG00000104067	325.361	8.3459	2.45934e-10	1.09691e-08	up	33	0	1.69278	-2.77056	chr15	29699367	29968915	-	chr15:29699367-29968915	TJP1	protein_coding	7082	ZO-1	MIM:601009|HGNC:HGNC:11827|Ensembl:ENSG00000104067	15q13.1	tight junction protein 1	hsa04520(Adherens junction)//hsa04530(Tight junction)//hsa04540(Gap junction)//hsa05110(Vibrio cholerae infection)//hsa05120(Epithelial cell signaling in Helicobacter pylori infection)//hsa05130(Pathogenic Escherichia coli infection)	GO:0043066(negative regulation of apoptotic process)//GO:0051497(negative regulation of stress fiber assembly)//GO:0030335(positive regulation of cell migration)//GO:0098609(cell-cell adhesion)//GO:0008284(positive regulation of cell population proliferation)//GO:0035633(maintenance of blood-brain barrier)//GO:2000810(regulation of bicellular tight junction assembly)//GO:0035329(hippo signaling)/…	GO:0005923(bicellular tight junction)//GO:0005886(plasma membrane)//GO:0005737(cytoplasm)//GO:0016020(membrane)//GO:0005829(cytosol)//GO:0030054(cell junction)//GO:0042995(cell projection)//GO:0005921(gap junction)//GO:0002102(podosome)//GO:0070160(tight junction)//GO:0032991(protein-containing complex)//GO:0016323(basolateral plasma membrane)//GO:0005912(adherens junction)//GO:0043296(apical jun…	GO:0005515(protein binding)//GO:0005516(calmodulin binding)//GO:0045296(cadherin binding)//GO:0050839(cell adhesion molecule binding)//GO:0008022(protein C-terminus binding)
ENSG00000104081	2.4611	1.29931	3.32354e-08	8.30343e-07	up	446	264	5.38742	4.095	chr15	40087890	40108892	-	chr15:40087890-40108892	BMF	protein_coding	90427	-	MIM:606266|HGNC:HGNC:24132|Ensembl:ENSG00000104081	15q15.1	Bcl2 modifying factor	hsa05206(MicroRNAs in cancer)	GO:0006915(apoptotic process)//GO:0043065(positive regulation of apoptotic process)//GO:0010507(negative regulation of autophagy)//GO:0031334(positive regulation of protein-containing complex assembly)//GO:0090200(positive regulation of release of cytochrome c from mitochondria)//GO:0001844(protein insertion into mitochondrial membrane involved in apoptotic signaling pathway)//GO:2001244(positive…	GO:0016459(myosin complex)//GO:0005886(plasma membrane)//GO:0005829(cytosol)//GO:0005741(mitochondrial outer membrane)//GO:0001669(acrosomal vesicle)	GO:0005515(protein binding)
ENSG00000104154	12.4413	3.63707	2.74897e-15	3.34184e-13	up	78	9	2.89556	-0.465675	chr15	45479606	45522755	-	chr15:45479606-45522755	SLC30A4	protein_coding	7782	ZNT4|znT-4	MIM:602095|HGNC:HGNC:11015|Ensembl:ENSG00000104154	15q21.1|15q21.1	solute carrier family 30 member 4		GO:0055085(transmembrane transport)//GO:0006812(cation transport)//GO:0006811(ion transport)//GO:0006829(zinc ion transport)//GO:0071577(zinc ion transmembrane transport)//GO:0061088(regulation of sequestering of zinc ion)//GO:0009636(response to toxic substance)//GO:0010043(response to zinc ion)//GO:0055069(zinc ion homeostasis)	GO:0016021(integral component of membrane)//GO:0005737(cytoplasm)//GO:0016020(membrane)//GO:0005768(endosome)//GO:0005765(lysosomal membrane)//GO:0010008(endosome membrane)//GO:0005764(lysosome)//GO:0031902(late endosome membrane)//GO:0005886(plasma membrane)//GO:0005770(late endosome)	GO:0008324(cation transmembrane transporter activity)//GO:0005515(protein binding)//GO:0005385(zinc ion transmembrane transporter activity)
ENSG00000104177	2.30783	1.20653	4.06743e-08	9.81747e-07	up	1001	632	6.55094	5.34716	chr15	48134632	48178353	-	chr15:48134632-48178353	MYEF2	protein_coding	50804	HsT18564|MEF-2|MST156|MSTP156|myEF-2	HGNC:HGNC:17940|Ensembl:ENSG00000104177	15q21.1	myelin expression factor 2		GO:0006357(regulation of transcription by RNA polymerase II)//GO:0030182(neuron differentiation)//GO:0014902(myotube differentiation)//GO:2000815(regulation of mRNA stability involved in response to oxidative stress)	GO:0005634(nucleus)//GO:0005737(cytoplasm)//GO:1990904(ribonucleoprotein complex)//GO:0071014(post-mRNA release spliceosomal complex)	GO:0003697(single-stranded DNA binding)//GO:0003676(nucleic acid binding)//GO:0000981(DNA-binding transcription factor activity, RNA polymerase II-specific)//GO:0003723(RNA binding)//GO:0003677(DNA binding)//GO:0003729(mRNA binding)
ENSG00000104267	3.38471	1.75903	8.28881e-17	1.38869e-14	up	13346	5746	10.2857	8.52709	chr8	85463968	85481493	+	chr8:85463968-85481493	CA2	protein_coding	760	CA-II|CAC|CAII|Car2|HEL-76|HEL-S-282	MIM:611492|HGNC:HGNC:1373|Ensembl:ENSG00000104267	8q21.2	carbonic anhydrase 2	hsa00910(Nitrogen metabolism)//hsa01100(Metabolic pathways)//hsa04964(Proximal tubule bicarbonate reclamation)//hsa04966(Collecting duct acid secretion)//hsa04971(Gastric acid secretion)//hsa04972(Pancreatic secretion)//hsa04976(Bile secretion)	GO:0006730(one-carbon metabolic process)//GO:0015701(bicarbonate transport)//GO:0038166(angiotensin-activated signaling pathway)//GO:0001822(kidney development)//GO:0009268(response to pH)//GO:0010033(response to organic substance)//GO:0010043(response to zinc ion)//GO:0015670(carbon dioxide transport)//GO:0032849(positive regulation of cellular pH reduction)//GO:0042475(odontogenesis of dentin-c…	GO:0005737(cytoplasm)//GO:0016020(membrane)//GO:0005886(plasma membrane)//GO:0005829(cytosol)//GO:0070062(extracellular exosome)//GO:0045177(apical part of cell)//GO:0005615(extracellular space)//GO:0005902(microvillus)//GO:0016323(basolateral plasma membrane)//GO:0030424(axon)	GO:0008270(zinc ion binding)//GO:0004089(carbonate dehydratase activity)//GO:0046872(metal ion binding)//GO:0016829(lyase activity)//GO:0005515(protein binding)//GO:0016836(hydro-lyase activity)//GO:0004064(arylesterase activity)
ENSG00000104327	4.22918	2.08038	1.43573e-09	5.19495e-08	up	99	34	3.23347	1.21942	chr8	90058608	90095475	-	chr8:90058608-90095475	CALB1	protein_coding	793	CALB|D-28K	MIM:114050|HGNC:HGNC:1434|Ensembl:ENSG00000104327	8q21.3	calbindin 1	hsa04961(Endocrine and other factor-regulated calcium reabsorption)	GO:0055074(calcium ion homeostasis)//GO:0044267(cellular protein metabolic process)//GO:0007616(long-term memory)//GO:0007614(short-term memory)//GO:0051480(regulation of cytosolic calcium ion concentration)//GO:0099509(regulation of presynaptic cytosolic calcium ion concentration)//GO:1900271(regulation of long-term synaptic potentiation)//GO:0007611(learning or memory)//GO:0007626(locomotory be…	GO:0005634(nucleus)//GO:0030425(dendrite)//GO:0030424(axon)//GO:0005829(cytosol)//GO:0043005(neuron projection)//GO:0045202(synapse)//GO:0070062(extracellular exosome)//GO:0043195(terminal bouton)//GO:0043025(neuronal cell body)//GO:0043197(dendritic spine)//GO:0005737(cytoplasm)//GO:0032420(stereocilium)//GO:0032437(cuticular plate)//GO:0044297(cell body)//GO:0044305(calyx of Held)//GO:0098686(h…	GO:0005509(calcium ion binding)//GO:0046872(metal ion binding)//GO:0008270(zinc ion binding)//GO:0005515(protein binding)//GO:0005499(vitamin D binding)//GO:0099534(calcium ion binding involved in regulation of presynaptic cytosolic calcium ion concentration)//GO:0099567(calcium ion binding involved in regulation of postsynaptic cytosolic calcium ion concentration)
ENSG00000104413	4.17273	2.06099	3.69141e-06	5.03046e-05	up	49	17	2.24158	0.307476	chr8	94641074	94707466	+	chr8:94641074-94707466	ESRP1	protein_coding	54845	DFNB109|RBM35A|RMB35A	MIM:612959|HGNC:HGNC:25966|Ensembl:ENSG00000104413	8q22.1	epithelial splicing regulatory protein 1		GO:0006397(mRNA processing)//GO:0008380(RNA splicing)//GO:0043484(regulation of RNA splicing)//GO:0008543(fibroblast growth factor receptor signaling pathway)//GO:0042669(regulation of inner ear auditory receptor cell fate specification)	GO:0005634(nucleus)//GO:0005654(nucleoplasm)//GO:0016604(nuclear body)//GO:1990904(ribonucleoprotein complex)	GO:0003676(nucleic acid binding)//GO:0003723(RNA binding)//GO:0005515(protein binding)//GO:0003729(mRNA binding)
ENSG00000104415	15.6712	3.97004	1.5797e-06	2.38471e-05	up	23	2	1.20011	-1.86302	chr8	133191039	133231690	+	chr8:133191039-133231690	CCN4	protein_coding	8840	WISP1|WISP1-OT1|WISP1-UT1|WISP1c|WISP1i|WISP1tc	MIM:603398|HGNC:HGNC:12769|Ensembl:ENSG00000104415	8q24.22	cellular communication network factor 4	hsa04310(Wnt signaling pathway)	GO:0007165(signal transduction)//GO:0007155(cell adhesion)//GO:0016055(Wnt signaling pathway)//GO:0050729(positive regulation of inflammatory response)//GO:0007267(cell-cell signaling)//GO:0060548(negative regulation of cell death)//GO:0048661(positive regulation of smooth muscle cell proliferation)//GO:0001649(osteoblast differentiation)//GO:0001817(regulation of cytokine production)//GO:0014911…	GO:0005576(extracellular region)//GO:0005829(cytosol)//GO:0005615(extracellular space)//GO:0031012(extracellular matrix)//GO:0005737(cytoplasm)	GO:0005515(protein binding)//GO:0005520(insulin-like growth factor binding)//GO:0005178(integrin binding)//GO:0008201(heparin binding)
ENSG00000104419	12.0495	3.5909	1.18409e-52	5.90182e-49	up	3416	413	8.32021	4.73613	chr8	133237175	133302022	-	chr8:133237175-133302022	NDRG1	protein_coding	10397	CAP43|CMT4D|DRG-1|DRG1|GC4|HMSNL|NDR1|NMSL|PROXY1|RIT42|RTP|TARG1|TDD5	MIM:605262|HGNC:HGNC:7679|Ensembl:ENSG00000104419	8q24.22	N-myc downstream regulated 1		GO:0042127(regulation of cell population proliferation)//GO:0032287(peripheral nervous system myelin maintenance)//GO:0045576(mast cell activation)//GO:0007165(signal transduction)//GO:0042981(regulation of apoptotic process)//GO:0030330(DNA damage response, signal transduction by p53 class mediator)//GO:0071456(cellular response to hypoxia)//GO:0010038(response to metal ion)//GO:0008285(negative…	GO:0005634(nucleus)//GO:0005737(cytoplasm)//GO:0016020(membrane)//GO:0005829(cytosol)//GO:0005886(plasma membrane)//GO:0005856(cytoskeleton)//GO:0005912(adherens junction)//GO:0015630(microtubule cytoskeleton)//GO:0005874(microtubule)//GO:0048471(perinuclear region of cytoplasm)//GO:0055038(recycling endosome membrane)//GO:0005815(microtubule organizing center)//GO:0005813(centrosome)//GO:0070062…	GO:0005515(protein binding)//GO:0008017(microtubule binding)//GO:0045296(cadherin binding)//GO:0031267(small GTPase binding)//GO:0043015(gamma-tubulin binding)
ENSG00000104435	521.944	9.02775	1.69034e-15	2.13293e-13	up	53	0	2.35142	-2.77056	chr8	79611117	79666158	+	chr8:79611117-79666158	STMN2	protein_coding	11075	SCG10|SCGN10	MIM:600621|HGNC:HGNC:10577|Ensembl:ENSG00000104435	8q21.13	stathmin 2		GO:0031110(regulation of microtubule polymerization or depolymerization)//GO:0031117(positive regulation of microtubule depolymerization)//GO:0007019(microtubule depolymerization)//GO:0031175(neuron projection development)//GO:0010976(positive regulation of neuron projection development)//GO:0010977(negative regulation of neuron projection development)//GO:0007026(negative regulation of microtubu…	GO:0005737(cytoplasm)//GO:0016020(membrane)//GO:0005794(Golgi apparatus)//GO:0005768(endosome)//GO:0042995(cell projection)//GO:0043005(neuron projection)//GO:0048471(perinuclear region of cytoplasm)//GO:0030424(axon)//GO:0030027(lamellipodium)//GO:0030426(growth cone)//GO:0043025(neuronal cell body)//GO:0031982(vesicle)	GO:0005515(protein binding)//GO:0048306(calcium-dependent protein binding)//GO:0015631(tubulin binding)
ENSG00000104728	2.23899	1.16285	0.00749061	0.0318626	up	37	24	1.85075	0.754266	chr8	1823926	1958641	+	chr8:1823926-1958641	ARHGEF10	protein_coding	9639	GEF10|SNCV	MIM:608136|HGNC:HGNC:14103|Ensembl:ENSG00000104728	8p23.3	Rho guanine nucleotide exchange factor 10		GO:0035023(regulation of Rho protein signal transduction)//GO:0022011(myelination in peripheral nervous system)//GO:0090307(mitotic spindle assembly)//GO:0030036(actin cytoskeleton organization)//GO:0090630(activation of GTPase activity)//GO:0051496(positive regulation of stress fiber assembly)//GO:0051298(centrosome duplication)//GO:0050790(regulation of catalytic activity)	GO:0005829(cytosol)//GO:0005813(centrosome)	GO:0005515(protein binding)//GO:0005085(guanyl-nucleotide exchange factor activity)//GO:0005089(Rho guanyl-nucleotide exchange factor activity)//GO:0019894(kinesin binding)
ENSG00000104765	3.56358	1.83333	1.47729e-16	2.35621e-14	up	1377	563	7.01041	5.18101	chr8	26383054	26505636	+	chr8:26383054-26505636	BNIP3L	protein_coding	665	BNIP3a|NIX	MIM:605368|HGNC:HGNC:1085|Ensembl:ENSG00000104765	8p21.2	BCL2 interacting protein 3 like	hsa04137(Mitophagy - animal)	GO:0043065(positive regulation of apoptotic process)//GO:0043066(negative regulation of apoptotic process)//GO:0006915(apoptotic process)//GO:0016032(viral process)//GO:0051607(defense response to virus)//GO:0042981(regulation of apoptotic process)//GO:0071456(cellular response to hypoxia)//GO:0010917(negative regulation of mitochondrial membrane potential)//GO:0016239(positive regulation of macr…	GO:0016021(integral component of membrane)//GO:0005740(mitochondrial envelope)//GO:0005634(nucleus)//GO:0016607(nuclear speck)//GO:0016020(membrane)//GO:0005783(endoplasmic reticulum)//GO:0005739(mitochondrion)//GO:0005741(mitochondrial outer membrane)//GO:0005635(nuclear envelope)//GO:0031224(intrinsic component of membrane)//GO:0005829(cytosol)	GO:0042803(protein homodimerization activity)//GO:0005515(protein binding)//GO:0042802(identical protein binding)//GO:0005521(lamin binding)
ENSG00000104804	19.1659	4.26047	2.86152e-05	0.000294224	up	15	1	0.631698	-2.24658	chr19	48880967	48898744	-	chr19:48880967-48898744	TULP2	protein_coding	7288	CT65|TUBL2	MIM:602309|HGNC:HGNC:12424|Ensembl:ENSG00000104804	19q13.33	TUB like protein 2		GO:0007601(visual perception)//GO:0061512(protein localization to cilium)	GO:0005737(cytoplasm)//GO:0005576(extracellular region)//GO:0005929(cilium)	GO:0044877(protein-containing complex binding)
ENSG00000104881	2.70436	1.43529	0.000945626	0.00576701	up	41	22	1.99312	0.640085	chr19	45379638	45406349	-	chr19:45379638-45406349	PPP1R13L	protein_coding	10848	IASPP|NKIP1|RAI|RAI4	MIM:607463|HGNC:HGNC:18838|Ensembl:ENSG00000104881	19q13.32	protein phosphatase 1 regulatory subunit 13 like		GO:0006351(transcription, DNA-templated)//GO:0006915(apoptotic process)//GO:0000122(negative regulation of transcription by RNA polymerase II)//GO:0003215(cardiac right ventricle morphogenesis)//GO:0003229(ventricular cardiac muscle tissue development)//GO:0009791(post-embryonic development)//GO:0031076(embryonic camera-type eye development)//GO:0035264(multicellular organism growth)//GO:0042633(…	GO:0005634(nucleus)//GO:0005737(cytoplasm)//GO:0005829(cytosol)//GO:0045171(intercellular bridge)//GO:0030054(cell junction)//GO:0005654(nucleoplasm)	GO:0005515(protein binding)//GO:0008134(transcription factor binding)//GO:0042802(identical protein binding)//GO:0045296(cadherin binding)//GO:0003714(transcription corepressor activity)
ENSG00000104888	11.6192	3.53844	2.1476e-06	3.1398e-05	up	25	3	1.31302	-1.56032	chr19	49429401	49442360	-	chr19:49429401-49442360	SLC17A7	protein_coding	57030	BNPI|VGLUT1	MIM:605208|HGNC:HGNC:16704|Ensembl:ENSG00000104888	19q13.33	solute carrier family 17 member 7	hsa04721(Synaptic vesicle cycle)//hsa04723(Retrograde endocannabinoid signaling)//hsa04724(Glutamatergic synapse)//hsa05033(Nicotine addiction)	GO:0055085(transmembrane transport)//GO:0006811(ion transport)//GO:0006814(sodium ion transport)//GO:0035725(sodium ion transmembrane transport)//GO:1902476(chloride transmembrane transport)//GO:0006836(neurotransmitter transport)//GO:0014047(glutamate secretion)//GO:0015813(L-glutamate transmembrane transport)//GO:0006820(anion transport)//GO:0035249(synaptic transmission, glutamatergic)//GO:005…	GO:0016020(membrane)//GO:0016021(integral component of membrane)//GO:0031410(cytoplasmic vesicle)//GO:0030054(cell junction)//GO:0045202(synapse)//GO:0043005(neuron projection)//GO:0098794(postsynapse)//GO:0030672(synaptic vesicle membrane)//GO:0005886(plasma membrane)//GO:0030285(integral component of synaptic vesicle membrane)//GO:0060203(clathrin-sculpted glutamate transport vesicle membrane)/…	GO:0022857(transmembrane transporter activity)//GO:0015293(symporter activity)//GO:0005436(sodium:phosphate symporter activity)//GO:0005313(L-glutamate transmembrane transporter activity)//GO:0005326(neurotransmitter transmembrane transporter activity)//GO:0005315(inorganic phosphate transmembrane transporter activity)//GO:0015319(sodium:inorganic phosphate symporter activity)
ENSG00000104894	2.04115	1.02938	1.58007e-06	2.38471e-05	up	1482	1058	7.11631	6.08841	chr19	49335171	49343335	+	chr19:49335171-49343335	CD37	protein_coding	951	GP52-40|TSPAN26	MIM:151523|HGNC:HGNC:1666|Ensembl:ENSG00000104894	19q13.33	CD37 molecule	hsa04640(Hematopoietic cell lineage)		GO:0016020(membrane)//GO:0016021(integral component of membrane)//GO:0005887(integral component of plasma membrane)//GO:0070062(extracellular exosome)//GO:0001772(immunological synapse)	GO:0005515(protein binding)
ENSG00000104901	2.77124	1.47053	0.00778622	0.0328537	up	23	12	1.20011	-0.125541	chr19	49361783	49375116	+	chr19:49361783-49375116	DKKL1	protein_coding	27120	CT34|SGY|SGY-1|SGY1	MIM:605418|HGNC:HGNC:16528|Ensembl:ENSG00000104901	19q13.33	dickkopf like acrosomal protein 1		GO:0007341(penetration of zona pellucida)//GO:0043065(positive regulation of apoptotic process)//GO:0045600(positive regulation of fat cell differentiation)//GO:2000225(negative regulation of testosterone biosynthetic process)//GO:0090090(negative regulation of canonical Wnt signaling pathway)//GO:2000272(negative regulation of signaling receptor activity)//GO:0009653(anatomical structure morphog…	GO:0005576(extracellular region)//GO:0031410(cytoplasmic vesicle)//GO:0001669(acrosomal vesicle)//GO:0005615(extracellular space)	GO:0039706(co-receptor binding)//GO:0048019(receptor antagonist activity)
ENSG00000104921	8.89287	3.15265	3.13506e-25	1.60266e-22	up	251	41	4.56198	1.47393	chr19	7688758	7702146	-	chr19:7688758-7702146	FCER2	protein_coding	2208	BLAST-2|CD23|CD23A|CLEC4J|FCE2|IGEBF	MIM:151445|HGNC:HGNC:3612|Ensembl:ENSG00000104921	19p13.2	Fc fragment of IgE receptor II	hsa04640(Hematopoietic cell lineage)//hsa05169(Epstein-Barr virus infection)	GO:0051770(positive regulation of nitric-oxide synthase biosynthetic process)//GO:0019221(cytokine-mediated signaling pathway)//GO:0051000(positive regulation of nitric-oxide synthase activity)//GO:0007219(Notch signaling pathway)//GO:0051712(positive regulation of killing of cells of other organism)//GO:0002925(positive regulation of humoral immune response mediated by circulating immunoglobulin)	GO:0016020(membrane)//GO:0016021(integral component of membrane)//GO:0005886(plasma membrane)//GO:0005576(extracellular region)//GO:0070062(extracellular exosome)//GO:0005887(integral component of plasma membrane)//GO:0009897(external side of plasma membrane)	GO:0030246(carbohydrate binding)//GO:0046872(metal ion binding)//GO:0005515(protein binding)//GO:0019863(IgE binding)//GO:0005178(integrin binding)
ENSG00000104953	5.68567	2.50733	8.3061e-09	2.46794e-07	up	59	15	2.50192	0.149505	chr19	2977538	2995179	+	chr19:2977538-2995179	TLE6	protein_coding	79816	GRG6|PREMBL	MIM:612399|HGNC:HGNC:30788|Ensembl:ENSG00000104953	19p13.3	TLE family member 6, subcortical maternal complex member	hsa04310(Wnt signaling pathway)//hsa04330(Notch signaling pathway)	GO:0006355(regulation of transcription, DNA-templated)//GO:0000122(negative regulation of transcription by RNA polymerase II)//GO:0090090(negative regulation of canonical Wnt signaling pathway)//GO:0007015(actin filament organization)//GO:0051293(establishment of spindle localization)//GO:0051302(regulation of cell division)//GO:0040019(positive regulation of embryonic development)//GO:0051646(mi…	GO:0005634(nucleus)//GO:0005737(cytoplasm)//GO:0005938(cell cortex)//GO:0005667(transcription regulator complex)//GO:0032991(protein-containing complex)	GO:0005515(protein binding)//GO:0003714(transcription corepressor activity)//GO:0070491(repressing transcription factor binding)
ENSG00000104967	109.12	6.76978	0.000352487	0.00248323	up	11	0	0.233025	-2.77056	chr19	45933734	45974044	-	chr19:45933734-45974044	NOVA2	protein_coding	4858	ANOVA|NEDASB|NOVA-2|NOVA3	MIM:601991|HGNC:HGNC:7887|Ensembl:ENSG00000104967	19q13.32	NOVA alternative splicing regulator 2		GO:0000398(mRNA splicing, via spliceosome)//GO:0010468(regulation of gene expression)//GO:0000381(regulation of alternative mRNA splicing, via spliceosome)//GO:0120163(negative regulation of cold-induced thermogenesis)//GO:0051252(regulation of RNA metabolic process)	GO:0005634(nucleus)//GO:0005737(cytoplasm)	GO:0003723(RNA binding)//GO:0003676(nucleic acid binding)//GO:0003729(mRNA binding)
ENSG00000105136	3.15193	1.65624	5.14299e-11	2.68418e-09	up	316	146	4.89238	3.25039	chr19	57487711	57496098	+	chr19:57487711-57496098	ZNF419	protein_coding	79744	ZAPHIR|ZNF419A	MIM:617410|HGNC:HGNC:20648|Ensembl:ENSG00000105136	19q13.43	zinc finger protein 419	hsa05168(Herpes simplex virus 1 infection)	GO:0006355(regulation of transcription, DNA-templated)//GO:0006357(regulation of transcription by RNA polymerase II)	GO:0005634(nucleus)	GO:0003676(nucleic acid binding)//GO:0046872(metal ion binding)//GO:0003677(DNA binding)//GO:0005515(protein binding)//GO:0000981(DNA-binding transcription factor activity, RNA polymerase II-specific)//GO:0000978(RNA polymerase II cis-regulatory region sequence-specific DNA binding)
ENSG00000105223	2.06541	1.04643	1.58567e-06	2.38953e-05	up	1056	745	6.62799	5.58369	chr19	40348456	40380439	+	chr19:40348456-40380439	PLD3	protein_coding	23646	AD19|HU-K4|HUK4|SCA46	MIM:615698|HGNC:HGNC:17158|Ensembl:ENSG00000105223	19q13.2	phospholipase D family member 3	hsa00564(Glycerophospholipid metabolism)//hsa00565(Ether lipid metabolism)//hsa01100(Metabolic pathways)	GO:0006259(DNA metabolic process)//GO:0090305(nucleic acid phosphodiester bond hydrolysis)//GO:0002376(immune system process)//GO:0006954(inflammatory response)//GO:1900015(regulation of cytokine production involved in inflammatory response)//GO:0014902(myotube differentiation)//GO:0016042(lipid catabolic process)	GO:0016020(membrane)//GO:0016021(integral component of membrane)//GO:0005783(endoplasmic reticulum)//GO:0005789(endoplasmic reticulum membrane)//GO:0005794(Golgi apparatus)//GO:0005768(endosome)//GO:0000139(Golgi membrane)//GO:0010008(endosome membrane)//GO:0005764(lysosome)//GO:0031902(late endosome membrane)//GO:0031901(early endosome membrane)//GO:0043202(lysosomal lumen)//GO:0070062(extracell…	GO:0003824(catalytic activity)//GO:0016787(hydrolase activity)//GO:0004518(nuclease activity)//GO:0005515(protein binding)//GO:0004527(exonuclease activity)//GO:0004630(phospholipase D activity)//GO:0045145(single-stranded DNA 5'-3' exodeoxyribonuclease activity)
ENSG00000105289	2.06774	1.04805	0.0165779	0.0609578	up	37	26	1.85075	0.860069	chr19	3708362	3750813	+	chr19:3708362-3750813	TJP3	protein_coding	27134	ZO-3|ZO3	MIM:612689|HGNC:HGNC:11829|Ensembl:ENSG00000105289	19p13.3	tight junction protein 3	hsa04530(Tight junction)	GO:0098609(cell-cell adhesion)//GO:0035633(maintenance of blood-brain barrier)//GO:0045216(cell-cell junction organization)//GO:0090557(establishment of endothelial intestinal barrier)//GO:0150105(protein localization to cell-cell junction)//GO:1905605(positive regulation of blood-brain barrier permeability)	GO:0005923(bicellular tight junction)//GO:0005634(nucleus)//GO:0016020(membrane)//GO:0005654(nucleoplasm)//GO:0005886(plasma membrane)//GO:0030054(cell junction)//GO:0005911(cell-cell junction)	GO:0005515(protein binding)//GO:0050839(cell adhesion molecule binding)
ENSG00000105376	2.49695	1.32017	0.0425388	0.129718	up	19	11	0.943718	-0.230255	chr19	10289952	10296778	+	chr19:10289952-10296778	ICAM5	protein_coding	7087	TLCN|TLN	MIM:601852|HGNC:HGNC:5348|Ensembl:ENSG00000105376	19p13.2	intercellular adhesion molecule 5		GO:0098609(cell-cell adhesion)//GO:0007155(cell adhesion)//GO:0050776(regulation of immune response)//GO:0030198(extracellular matrix organization)//GO:0006909(phagocytosis)	GO:0016020(membrane)//GO:0016021(integral component of membrane)//GO:0005886(plasma membrane)//GO:0005887(integral component of plasma membrane)	GO:0005515(protein binding)//GO:0005178(integrin binding)
ENSG00000105388	99.2913	6.6336	0.00126829	0.00735485	up	10	0	0.1134	-2.77056	chr19	41708585	41730433	+	chr19:41708585-41730433	CEACAM5	protein_coding	1048	CD66e|CEA	MIM:114890|HGNC:HGNC:1817|Ensembl:ENSG00000105388	19q13.2	CEA cell adhesion molecule 5		GO:0043066(negative regulation of apoptotic process)//GO:0006915(apoptotic process)//GO:0007155(cell adhesion)//GO:0050900(leukocyte migration)//GO:0034109(homotypic cell-cell adhesion)//GO:0007156(homophilic cell adhesion via plasma membrane adhesion molecules)//GO:0007157(heterophilic cell-cell adhesion via plasma membrane cell adhesion molecules)//GO:2000811(negative regulation of anoikis)//GO…	GO:0016020(membrane)//GO:0005886(plasma membrane)//GO:0016324(apical plasma membrane)//GO:0009986(cell surface)//GO:0016323(basolateral plasma membrane)//GO:0031225(anchored component of membrane)//GO:0005576(extracellular region)//GO:0005887(integral component of plasma membrane)//GO:0070062(extracellular exosome)//GO:0071575(integral component of external side of plasma membrane)	GO:0042803(protein homodimerization activity)//GO:0005515(protein binding)//GO:0042802(identical protein binding)//GO:0034235(GPI anchor binding)
ENSG00000105419	5.97312	2.57849	0.000421961	0.00289225	up	21	5	1.0776	-1.09718	chr19	47403124	47419527	-	chr19:47403124-47419527	MEIS3	protein_coding	56917	MRG2	HGNC:HGNC:29537|Ensembl:ENSG00000105419	19q13.32	Meis homeobox 3		GO:0006355(regulation of transcription, DNA-templated)//GO:0006357(regulation of transcription by RNA polymerase II)//GO:0045944(positive regulation of transcription by RNA polymerase II)//GO:0009887(animal organ morphogenesis)//GO:0009880(embryonic pattern specification)//GO:0001654(eye development)//GO:0007420(brain development)//GO:0008284(positive regulation of cell population proliferation)/…	GO:0005634(nucleus)//GO:0000785(chromatin)	GO:0003677(DNA binding)//GO:0005515(protein binding)//GO:0000981(DNA-binding transcription factor activity, RNA polymerase II-specific)//GO:0000978(RNA polymerase II cis-regulatory region sequence-specific DNA binding)//GO:1990837(sequence-specific double-stranded DNA binding)//GO:0001228(DNA-binding transcription activator activity, RNA polymerase II-specific)//GO:0043565(sequence-specific DNA b…
ENSG00000105492	3.83733	1.9401	1.67371e-15	2.1254e-13	up	469	178	5.45972	3.5323	chr19	51517819	51531856	-	chr19:51517819-51531856	SIGLEC6	protein_coding	946	CD327|CD33L|CD33L1|CD33L2|CDW327|OBBP1	MIM:604405|HGNC:HGNC:10875|Ensembl:ENSG00000105492	19q13.41	sialic acid binding Ig like lectin 6		GO:0007155(cell adhesion)//GO:0007267(cell-cell signaling)	GO:0016020(membrane)//GO:0016021(integral component of membrane)//GO:0005829(cytosol)//GO:0005886(plasma membrane)//GO:0005576(extracellular region)//GO:0005887(integral component of plasma membrane)	GO:0030246(carbohydrate binding)//GO:0005515(protein binding)//GO:0033691(sialic acid binding)
ENSG00000105499	2.14342	1.09992	4.327e-06	5.76268e-05	up	359	244	5.07558	3.98236	chr19	48047843	48110817	-	chr19:48047843-48110817	PLA2G4C	protein_coding	8605	CPLA2-gamma	MIM:603602|HGNC:HGNC:9037|Ensembl:ENSG00000105499	19q13.33	phospholipase A2 group IVC	hsa00564(Glycerophospholipid metabolism)//hsa00565(Ether lipid metabolism)//hsa00590(Arachidonic acid metabolism)//hsa00591(Linoleic acid metabolism)//hsa00592(alpha-Linolenic acid metabolism)//hsa01100(Metabolic pathways)//hsa04010(MAPK signaling pathway)//hsa04014(Ras signaling pathway)//hsa04072(Phospholipase D signaling pathway)//hsa04217(Necroptosis)//hsa04270(Vascular smooth muscle contract…	GO:0009395(phospholipid catabolic process)//GO:0006629(lipid metabolic process)//GO:0006644(phospholipid metabolic process)//GO:0016032(viral process)//GO:0006954(inflammatory response)//GO:0140042(lipid droplet formation)//GO:0035556(intracellular signal transduction)//GO:0019369(arachidonic acid metabolic process)//GO:0036149(phosphatidylinositol acyl-chain remodeling)//GO:0036151(phosphatidylc…	GO:0016020(membrane)//GO:0005783(endoplasmic reticulum)//GO:0005789(endoplasmic reticulum membrane)//GO:0005886(plasma membrane)//GO:0005739(mitochondrion)//GO:0005829(cytosol)//GO:0031966(mitochondrial membrane)//GO:0005811(lipid droplet)//GO:0005654(nucleoplasm)//GO:0005635(nuclear envelope)	GO:0004620(phospholipase activity)//GO:0016740(transferase activity)//GO:0016787(hydrolase activity)//GO:0005515(protein binding)//GO:0004623(phospholipase A2 activity)//GO:0102567(phospholipase A2 activity (consuming 1,2-dipalmitoylphosphatidylcholine))//GO:0102568(phospholipase A2 activity consuming 1,2-dioleoylphosphatidylethanolamine))//GO:0005509(calcium ion binding)//GO:0004622(lysophosphol…
ENSG00000105509	8.88762	3.1518	0.000794618	0.0049563	up	13	2	0.446089	-1.86302	chr19	51713112	51723991	-	chr19:51713112-51723991	HAS1	protein_coding	3036	HAS	MIM:601463|HGNC:HGNC:4818|Ensembl:ENSG00000105509	19q13.41	hyaluronan synthase 1		GO:0030213(hyaluronan biosynthetic process)//GO:0044849(estrous cycle)//GO:0007155(cell adhesion)//GO:0045226(extracellular polysaccharide biosynthetic process)//GO:0085029(extracellular matrix assembly)//GO:0010764(negative regulation of fibroblast migration)//GO:0036120(cellular response to platelet-derived growth factor stimulus)//GO:0006024(glycosaminoglycan biosynthetic process)	GO:0016020(membrane)//GO:0016021(integral component of membrane)//GO:0005886(plasma membrane)//GO:0005887(integral component of plasma membrane)	GO:0050501(hyaluronan synthase activity)//GO:0016740(transferase activity)//GO:0016757(transferase activity, transferring glycosyl groups)//GO:0005515(protein binding)//GO:0042802(identical protein binding)
ENSG00000105516	2.26309	1.17829	3.83268e-05	0.000379405	up	143	92	3.75705	2.59711	chr19	48630030	48637379	-	chr19:48630030-48637379	DBP	protein_coding	1628	DABP|taxREB302	MIM:124097|HGNC:HGNC:2697|Ensembl:ENSG00000105516	19q13.33	D-box binding PAR bZIP transcription factor		GO:0006355(regulation of transcription, DNA-templated)//GO:0006357(regulation of transcription by RNA polymerase II)//GO:0007623(circadian rhythm)//GO:0045944(positive regulation of transcription by RNA polymerase II)//GO:0048511(rhythmic process)//GO:0001889(liver development)	GO:0005634(nucleus)//GO:0000785(chromatin)	GO:0003700(DNA-binding transcription factor activity)//GO:0000977(RNA polymerase II transcription regulatory region sequence-specific DNA binding)//GO:0003677(DNA binding)//GO:0000981(DNA-binding transcription factor activity, RNA polymerase II-specific)//GO:0000978(RNA polymerase II cis-regulatory region sequence-specific DNA binding)//GO:1990837(sequence-specific double-stranded DNA binding)//G…
ENSG00000105538	2.11219	1.07874	0.0233933	0.0805514	up	32	22	1.65043	0.640085	chr19	48720585	48740610	-	chr19:48720585-48740610	RASIP1	protein_coding	54922	RAIN	MIM:609623|HGNC:HGNC:24716|Ensembl:ENSG00000105538	19q13.33	Ras interacting protein 1		GO:0007165(signal transduction)//GO:0010507(negative regulation of autophagy)//GO:0001525(angiogenesis)//GO:0043087(regulation of GTPase activity)//GO:0048754(branching morphogenesis of an epithelial tube)//GO:0001570(vasculogenesis)//GO:0035024(negative regulation of Rho protein signal transduction)//GO:0033625(positive regulation of integrin activation)//GO:1905709(negative regulation of membra…	GO:0005737(cytoplasm)//GO:0005794(Golgi apparatus)//GO:0048471(perinuclear region of cytoplasm)//GO:0005795(Golgi stack)//GO:0032991(protein-containing complex)//GO:0005911(cell-cell junction)	GO:0005515(protein binding)//GO:0042803(protein homodimerization activity)//GO:0051020(GTPase binding)
ENSG00000105559	2.83224	1.50194	0.000543102	0.0035937	up	41	21	1.99312	0.579417	chr19	48837097	48868617	-	chr19:48837097-48868617	PLEKHA4	protein_coding	57664	PEPP1	MIM:607769|HGNC:HGNC:14339|Ensembl:ENSG00000105559	19q13.33	pleckstrin homology domain containing A4		GO:0006661(phosphatidylinositol biosynthetic process)//GO:0090263(positive regulation of canonical Wnt signaling pathway)//GO:2000096(positive regulation of Wnt signaling pathway, planar cell polarity pathway)	GO:0005737(cytoplasm)//GO:0016020(membrane)//GO:0005886(plasma membrane)//GO:0031234(extrinsic component of cytoplasmic side of plasma membrane)	GO:0005515(protein binding)//GO:0008289(lipid binding)//GO:0042802(identical protein binding)//GO:0005546(phosphatidylinositol-4,5-bisphosphate binding)//GO:0032266(phosphatidylinositol-3-phosphate binding)//GO:0080025(phosphatidylinositol-3,5-bisphosphate binding)//GO:0043325(phosphatidylinositol-3,4-bisphosphate binding)
ENSG00000105767	2.07071	1.05013	0.00895696	0.0368956	up	47	33	2.18336	1.1791	chr19	43622368	43639850	-	chr19:43622368-43639850	CADM4	protein_coding	199731	IGSF4C|NECL4|Necl-4|TSLL2|synCAM4	MIM:609744|HGNC:HGNC:30825|Ensembl:ENSG00000105767	19q13.31	cell adhesion molecule 4		GO:0007155(cell adhesion)//GO:0042127(regulation of cell population proliferation)//GO:0001933(negative regulation of protein phosphorylation)//GO:0001932(regulation of protein phosphorylation)//GO:0035020(regulation of Rac protein signal transduction)//GO:2000145(regulation of cell motility)//GO:0030948(negative regulation of vascular endothelial growth factor receptor signaling pathway)//GO:190…	GO:0016020(membrane)//GO:0016021(integral component of membrane)//GO:0031252(cell leading edge)//GO:0044291(cell-cell contact zone)	GO:0043184(vascular endothelial growth factor receptor 2 binding)//GO:0019903(protein phosphatase binding)//GO:0030971(receptor tyrosine kinase binding)//GO:0043183(vascular endothelial growth factor receptor 1 binding)
ENSG00000105894	305.703	8.25599	7.42892e-10	2.84281e-08	up	31	0	1.6068	-2.77056	chr7	137227341	137343774	-	chr7:137227341-137343774	PTN	protein_coding	5764	HARP|HB-GAM|HBBM|HBGF-8|HBGF8|HBNF|HBNF-1|NEGF1|OSF-1	MIM:162095|HGNC:HGNC:9630|Ensembl:ENSG00000105894	7q33	pleiotrophin		GO:0007165(signal transduction)//GO:0032515(negative regulation of phosphoprotein phosphatase activity)//GO:0001503(ossification)//GO:0001889(liver development)//GO:0002232(leukocyte chemotaxis involved in inflammatory response)//GO:0002690(positive regulation of leukocyte chemotaxis)//GO:0007406(negative regulation of neuroblast proliferation)//GO:0007420(brain development)//GO:0007507(heart dev…	GO:0005576(extracellular region)//GO:0005615(extracellular space)//GO:0005604(basement membrane)//GO:0005737(cytoplasm)//GO:0009986(cell surface)//GO:0016020(membrane)//GO:0031594(neuromuscular junction)//GO:0048471(perinuclear region of cytoplasm)//GO:0098793(presynapse)//GO:0098794(postsynapse)//GO:0005886(plasma membrane)//GO:0005783(endoplasmic reticulum)//GO:0032991(protein-containing comple…	GO:0008083(growth factor activity)//GO:0005515(protein binding)//GO:0008201(heparin binding)//GO:0004864(protein phosphatase inhibitor activity)//GO:0005539(glycosaminoglycan binding)//GO:0035373(chondroitin sulfate proteoglycan binding)//GO:0038085(vascular endothelial growth factor binding)//GO:0043394(proteoglycan binding)//GO:0045545(syndecan binding)//GO:1904399(heparan sulfate binding)//GO:…
ENSG00000105976	5.33357	2.4151	2.27908e-08	5.89338e-07	up	59	16	2.50192	0.230651	chr7	116672196	116798377	+	chr7:116672196-116798377	MET	protein_coding	4233	AUTS9|DFNB97|HGFR|RCCP2|c-Met	MIM:164860|HGNC:HGNC:7029|Ensembl:ENSG00000105976	7q31.2	MET proto-oncogene, receptor tyrosine kinase	hsa01521(EGFR tyrosine kinase inhibitor resistance)//hsa04010(MAPK signaling pathway)//hsa04014(Ras signaling pathway)//hsa04015(Rap1 signaling pathway)//hsa04020(Calcium signaling pathway)//hsa04151(PI3K-Akt signaling pathway)//hsa04360(Axon guidance)//hsa04510(Focal adhesion)//hsa04520(Adherens junction)//hsa05100(Bacterial invasion of epithelial cells)//hsa05120(Epithelial cell signaling in He…	GO:0006468(protein phosphorylation)//GO:0007169(transmembrane receptor protein tyrosine kinase signaling pathway)//GO:0071526(semaphorin-plexin signaling pathway)//GO:0045944(positive regulation of transcription by RNA polymerase II)//GO:1901299(negative regulation of hydrogen peroxide-mediated programmed cell death)//GO:0016310(phosphorylation)//GO:0018108(peptidyl-tyrosine phosphorylation)//GO:…	GO:0016021(integral component of membrane)//GO:0016020(membrane)//GO:0005576(extracellular region)//GO:0009986(cell surface)//GO:0005886(plasma membrane)//GO:0005887(integral component of plasma membrane)//GO:0043235(receptor complex)//GO:0009925(basal plasma membrane)	GO:0005524(ATP binding)//GO:0005515(protein binding)//GO:0004672(protein kinase activity)//GO:0004714(transmembrane receptor protein tyrosine kinase activity)//GO:0004713(protein tyrosine kinase activity)//GO:0017154(semaphorin receptor activity)//GO:0000166(nucleotide binding)//GO:0016301(kinase activity)//GO:0016740(transferase activity)//GO:0042802(identical protein binding)//GO:0019903(protei…
ENSG00000105991	2.21369	1.14645	0.000957442	0.005825	up	70	46	2.74268	1.63164	chr7	27092993	27096000	-	chr7:27092993-27096000	HOXA1	protein_coding	3198	BSAS|HOX1|HOX1F	MIM:142955|HGNC:HGNC:5099|Ensembl:ENSG00000105991	7p15.2	homeobox A1	hsa04550(Signaling pathways regulating pluripotency of stem cells)	GO:0006355(regulation of transcription, DNA-templated)//GO:0006357(regulation of transcription by RNA polymerase II)	GO:0005634(nucleus)	GO:0003677(DNA binding)//GO:0000981(DNA-binding transcription factor activity, RNA polymerase II-specific)
ENSG00000105997	3.01982	1.59446	0.00778622	0.0328537	up	23	11	1.20011	-0.230255	chr7	27106184	27152583	-	chr7:27106184-27152583	HOXA3	protein_coding	3200	HOX1|HOX1E	MIM:142954|HGNC:HGNC:5104|Ensembl:ENSG00000105997	7p15.2	homeobox A3		GO:0006355(regulation of transcription, DNA-templated)//GO:0007275(multicellular organism development)//GO:0006357(regulation of transcription by RNA polymerase II)//GO:0001525(angiogenesis)//GO:0009952(anterior/posterior pattern specification)//GO:0048704(embryonic skeletal system morphogenesis)//GO:0001974(blood vessel remodeling)//GO:0008284(positive regulation of cell population proliferation…	GO:0005634(nucleus)//GO:0005654(nucleoplasm)//GO:0000785(chromatin)	GO:0003677(DNA binding)//GO:0003700(DNA-binding transcription factor activity)//GO:0000981(DNA-binding transcription factor activity, RNA polymerase II-specific)//GO:0005515(protein binding)//GO:0000978(RNA polymerase II cis-regulatory region sequence-specific DNA binding)//GO:0071837(HMG box domain binding)
ENSG00000106013	6.00783	2.58684	0.000910749	0.00557666	up	17	4	0.796127	-1.31025	chr7	118214669	118496171	+	chr7:118214669-118496171	ANKRD7	protein_coding	56311	TSA806	MIM:610731|HGNC:HGNC:18588|Ensembl:ENSG00000106013	7q31.31	ankyrin repeat domain 7			GO:0005654(nucleoplasm)//GO:0005813(centrosome)	GO:0005515(protein binding)
ENSG00000106018	2.22797	1.15573	0.0370978	0.116219	up	20	13	1.01221	-0.0279156	chr7	159028175	159144867	-	chr7:159028175-159144867	VIPR2	protein_coding	7434	C16DUPq36.3|DUP7q36.3|PACAP-R-3|PACAP-R3|VIP-R-2|VPAC2|VPAC2R|VPCAP2R	MIM:601970|HGNC:HGNC:12695|Ensembl:ENSG00000106018	7q36.3	vasoactive intestinal peptide receptor 2	hsa04024(cAMP signaling pathway)//hsa04080(Neuroactive ligand-receptor interaction)	GO:0007186(G protein-coupled receptor signaling pathway)//GO:0007166(cell surface receptor signaling pathway)//GO:0007165(signal transduction)//GO:0007188(adenylate cyclase-modulating G protein-coupled receptor signaling pathway)//GO:0007267(cell-cell signaling)//GO:0007190(activation of adenylate cyclase activity)//GO:0048662(negative regulation of smooth muscle cell proliferation)	GO:0016021(integral component of membrane)//GO:0016020(membrane)//GO:0005886(plasma membrane)//GO:0005887(integral component of plasma membrane)	GO:0004930(G protein-coupled receptor activity)//GO:0004999(vasoactive intestinal polypeptide receptor activity)//GO:0004888(transmembrane signaling receptor activity)//GO:0008528(G protein-coupled peptide receptor activity)//GO:0017046(peptide hormone binding)
ENSG00000106034	5.56242	2.47571	1.76491e-05	0.000195592	up	31	8	1.6068	-0.599558	chr7	120988697	121297442	+	chr7:120988697-121297442	CPED1	protein_coding	79974	C7orf58	HGNC:HGNC:26159|Ensembl:ENSG00000106034	7q31.31	cadherin like and PC-esterase domain containing 1			GO:0005783(endoplasmic reticulum)
ENSG00000106086	2.71488	1.44089	8.57318e-10	3.24333e-08	up	492	264	5.52856	4.095	chr7	30027404	30130483	+	chr7:30027404-30130483	PLEKHA8	protein_coding	84725	FAPP2	MIM:608639|HGNC:HGNC:30037|Ensembl:ENSG00000106086	7p14.3	pleckstrin homology domain containing A8		GO:0120009(intermembrane lipid transfer)//GO:0015031(protein transport)//GO:0006869(lipid transport)//GO:0035627(ceramide transport)//GO:1902389(ceramide 1-phosphate transport)//GO:0006661(phosphatidylinositol biosynthetic process)//GO:0035621(ER to Golgi ceramide transport)//GO:0046836(glycolipid transport)	GO:0005737(cytoplasm)//GO:0016020(membrane)//GO:0005794(Golgi apparatus)//GO:0005654(nucleoplasm)//GO:0005802(trans-Golgi network)//GO:0005829(cytosol)//GO:0000139(Golgi membrane)	GO:0120013(lipid transfer activity)//GO:0008289(lipid binding)//GO:1902387(ceramide 1-phosphate binding)//GO:1902388(ceramide 1-phosphate transfer activity)//GO:0070273(phosphatidylinositol-4-phosphate binding)//GO:0097001(ceramide binding)//GO:0051861(glycolipid binding)//GO:0017089(glycolipid transfer activity)
ENSG00000106089	2.50486	1.32473	0.000896798	0.00550985	up	50	29	2.26984	1.00551	chr7	73699206	73719672	-	chr7:73699206-73719672	STX1A	protein_coding	6804	HPC-1|P35-1|STX1|SYN1A	MIM:186590|HGNC:HGNC:11433|Ensembl:ENSG00000106089	7q11.23	syntaxin 1A	hsa04130(SNARE interactions in vesicular transport)//hsa04721(Synaptic vesicle cycle)//hsa04911(Insulin secretion)//hsa05016(Huntington disease)//hsa05022(Pathways of neurodegeneration - multiple diseases)//hsa05031(Amphetamine addiction)	GO:0016192(vesicle-mediated transport)//GO:0017157(regulation of exocytosis)//GO:0006886(intracellular protein transport)//GO:0006887(exocytosis)//GO:0016925(protein sumoylation)//GO:0006836(neurotransmitter transport)//GO:0006906(vesicle fusion)//GO:0031629(synaptic vesicle fusion to presynaptic active zone membrane)//GO:0050796(regulation of insulin secretion)//GO:0019221(cytokine-mediated sign…	GO:0016021(integral component of membrane)//GO:0016020(membrane)//GO:0005886(plasma membrane)//GO:0005576(extracellular region)//GO:0031410(cytoplasmic vesicle)//GO:0030054(cell junction)//GO:0045202(synapse)//GO:0043005(neuron projection)//GO:0030672(synaptic vesicle membrane)//GO:0005829(cytosol)//GO:0012505(endomembrane system)//GO:0031201(SNARE complex)//GO:0008021(synaptic vesicle)//GO:00080…	GO:0000149(SNARE binding)//GO:0005515(protein binding)//GO:0042802(identical protein binding)//GO:0005484(SNAP receptor activity)//GO:0019869(chloride channel inhibitor activity)//GO:0019900(kinase binding)//GO:0017022(myosin binding)//GO:0019855(calcium channel inhibitor activity)//GO:0019904(protein domain specific binding)//GO:0030674(protein-macromolecule adaptor activity)//GO:0032028(myosin …
[truncated: 1,931 more rows]

## Sheet: dn.H-1_vs_NC-1
down H-1 vs NC-1 Fold change cutoff: 2.0 Pvalue cutoff: 0.05 Column A: gene_id, the Ensembl gene identifier. Column B-F: Statistics results by edgeR between two samples, including Fold change, log2(Fold change), pvalue, padj and regulation. Column G-H: raw count of each sample. Column I-J: logCPM of each sample. Column K-Z: annotation informations, including gene name, chromosome location, Entrez…
[truncated: 797 more rows]
